1

2

3 Capsid lattice destabilization leads to premature loss of the viral genome and integrase  
4 enzyme during HIV-1 infection

5

6 Shot title: The HIV-1 capsid lattice protects the vRNPs from degradation in target cells

7

8

9

10 Jenna E. Eschbach<sup>1,\*</sup>, Jennifer L. Elliott<sup>1</sup>, Wen Li<sup>2,3</sup>, Kaneil K. Zadrozny<sup>4</sup>, Keanu Davis<sup>1</sup>,  
11 Shawn Mohammed<sup>1</sup>, Dana Q. Lawson<sup>1</sup>, Owen Pornillos<sup>4</sup>, Alan N. Engelman<sup>2,3</sup>, Sebla B.  
12 Kutluay<sup>1</sup>

13

14

15 <sup>1</sup> Department of Molecular Microbiology, Washington University School of Medicine,  
16 Saint Louis, MO 63110, USA

17 <sup>2</sup> Department of Cancer Immunology and Virology, Dana-Farber Cancer Institute,  
18 Boston, MA 02215, USA

19 <sup>3</sup> Department of Medicine, Harvard Medical School, Boston, MA 02115, USA

20 <sup>4</sup> Department of Molecular Physiology and Biological Physics, University of Virginia,  
21 Charlottesville, Virginia 22908, USA

22

23

24 Correspondence: [Kutluay@wustl.edu](mailto:Kutluay@wustl.edu)

25

26

27           **ABSTRACT**

28           The human immunodeficiency virus type 1 (HIV-1) capsid (CA) protein forms a  
29 conical lattice around the viral ribonucleoprotein complex (vRNP) consisting of a dimeric  
30 viral genome and associated proteins, together constituting the viral core. Upon entry  
31 into target cells, the viral core undergoes a process termed uncoating, during which CA  
32 molecules are shed from the lattice. Although the timing and degree of uncoating are  
33 important for reverse transcription and integration, the molecular basis of this  
34 phenomenon remains unclear. Using complementary approaches, we assessed the  
35 impact of core destabilization on the intrinsic stability of the CA lattice in vitro and fates  
36 of viral core components in infected cells. We found that substitutions in CA can impact  
37 the intrinsic stability of the CA lattice in vitro in the absence of vRNPs, which mirrored  
38 findings from assessment of CA stability in virions. Altering CA stability tended to  
39 increase the propensity to form morphologically aberrant particles, in which the vRNPs  
40 were mislocalized between the CA lattice and the viral lipid envelope. Importantly,  
41 destabilization of the CA lattice led to premature dissociation of CA from vRNPs in target  
42 cells, which was accompanied by proteasomal-independent losses of the viral genome  
43 and integrase enzyme. Overall, our studies show that the CA lattice protects the vRNP  
44 from untimely degradation in target cells and provide the mechanistic basis of how CA  
45 stability influences reverse transcription.

46

47           **AUTHOR SUMMARY**

48           The human immunodeficiency virus type 1 (HIV-1) capsid (CA) protein forms a  
49 conical lattice around the viral RNA genome and the associated viral enzymes and  
50 proteins, together constituting the viral core. Upon infection of a new cell, viral cores are  
51 released into the cytoplasm where they undergo a process termed “uncoating”, i.e.  
52 shedding of CA molecules from the conical lattice. Although proper and timely uncoating

53 has been shown to be important for reverse transcription, the molecular mechanisms  
54 that link these two events remain poorly understood. In this study, we show that  
55 destabilization of the CA lattice leads to premature dissociation of CA from viral cores,  
56 which exposes the viral genome and the integrase enzyme for degradation in target  
57 cells. Thus, our studies demonstrate that the CA lattice protects the viral  
58 ribonucleoprotein complexes from untimely degradation in target cells and provide the  
59 first causal link between how CA stability affects reverse transcription.

60

## 61 **INTRODUCTION**

62 Formation of infectious HIV-1 virions is coordinated by the major structural  
63 polyproteins Gag and Gag-Pol. Gag selectively packages a dimeric viral genome,  
64 targets particle assembly to the plasma membrane, and oligomerizes with other Gag and  
65 Gag-Pol polyproteins at the plasma membrane primarily through interactions between  
66 the capsid (CA) domains of neighboring Gag molecules [1, 2]. Following the budding of  
67 immature virions, the virally encoded protease enzyme cleaves Gag and Gag-Pol  
68 polyproteins into their constituent domains triggering virion maturation [1, 2]. Virions  
69 undergo a major structural rearrangement, such that the cleaved CA monomers form a  
70 conical lattice in which the viral genome condenses with both the cleaved nucleocapsid  
71 (NC) domain of Gag and the Pol-encoded viral enzymes, reverse transcriptase (RT) and  
72 integrase (IN), to form the viral core [3].

73 The mature HIV-1 core contains ~250 hexameric and 12 pentameric rings of CA  
74 that are stabilized through an extensive network of intra- and inter-subunit interactions  
75 between CA molecules [4-9]. Within pentamers and hexamers, the N-terminal domain  
76 (NTD) of one CA molecule interacts with a groove in the C-terminal domain (CTD) of the  
77 neighboring CA molecule. The first three helices of the NTD interact to form an 18-helix  
78 bundle (or 15-helix bundle for pentamers) at the center of the hexamer. Inter-hexamer

79 connections forming the hexagonal lattice are mediated through CTD-CTD interactions.  
80 In addition, recent studies revealed that a small molecule, inositol hexakisphosphate  
81 (IP<sub>6</sub>), can facilitate the assembly of the CA lattice [10] and regulate its stability [11].  
82 Mutations or compounds that target the critical interactions between individual CA  
83 subunits disrupt processes ranging from particle assembly, virion morphogenesis,  
84 reverse transcription, and nuclear entry in target cells, underscoring a wide range of  
85 functional requirements for the CA protein and/or capsid lattice in multiple steps of the  
86 viral life cycle [12-17].

87       Following their release into the cytoplasm of target cells, HIV-1 cores undergo a  
88 poorly understood process termed uncoating, i.e. shedding of CA subunits from the core.  
89 The current consensus in the field is that viral cores undergo various levels or stages of  
90 uncoating [18-20]. First, a large amount of virion-associated CA appears to be lost soon  
91 after entry [21-25]. This is likely due to a combination of uncoating as a result of the  
92 metastable structure of the CA lattice and dispersal of CA molecules that are  
93 incorporated into virions but are not part of the CA lattice [26-29]. A second phase of  
94 uncoating takes place during or as a result of reverse transcription [21, 23, 25, 30-32].  
95 Additionally, a number of cellular proteins that bind CA have been proposed to regulate  
96 core stability and uncoating [33]. Although the majority of virion-associated CA is lost  
97 during uncoating, both biochemical and genetic evidence supports the notion that some  
98 CA remains associated with the reverse transcription complex (RTC) and pre-integration  
99 complex (PIC) that respectively mediate reverse transcription and integration during  
100 virus infection: CA is the major determinant for HIV-1 nuclear entry [34-41], a fraction of  
101 CA remains physically associated with the PIC [42-47], CA contributes to viral DNA  
102 (vDNA) integration into actively transcribed genes [39, 48-51], and CA may influence  
103 innate host responses by shielding the reverse transcription products from cGAS-  
104 STING-mediated sensing [52-56].

105 Proper uncoating of the HIV-1 core and reverse transcription appear to be  
106 interconnected processes. Mutations in CA that destabilize the core in vitro block  
107 reverse transcription in target cells [13, 57-59]. Additionally, reverse transcription can  
108 accelerate or, if inhibited, delay the uncoating of the CA lattice [30, 31, 60-62]. Exactly  
109 how altering the stability of the CA lattice causes defects in reverse transcription is  
110 unclear; however, the underlying mechanism may be similar to that which leads to the  
111 reverse transcription defects observed upon inhibition of HIV-1 integrase (IN)-RNA  
112 interactions.

113 The HIV-1 IN enzyme has recently been shown to carry out a non-catalytic role in  
114 particle maturation through its binding to the viral RNA (vRNA) genome [63]. Inhibition of  
115 IN-RNA interactions yields morphologically aberrant particles in which the vRNPs  
116 composed of the vRNA and associated enzymes are mislocalized outside the CA lattice  
117 [63-65]. Much like viruses with altered core stability, these viruses are blocked at an  
118 early reverse transcription stage in target cells [63-89], which can be explained partly by  
119 the premature degradation of the unprotected vRNA [90]. Curiously, viruses generated in  
120 the presence of a CA-targeting compound, C1, also yield morphologically aberrant  
121 particles that are blocked at reverse transcription [91]. Whether CA destabilization  
122 affects IN-RNA interactions and whether degradation of the unprotected vRNPs  
123 underlies the reverse transcription defect upon CA destabilization remains unexplored.

124 HIV-1 uncoating has been a difficult process to study due to the metastable  
125 nature of the CA lattice and relatively high particle-to-infectivity ratio of HIV-1  
126 preparations that indicate that the vast majority of virus particles are non-infectious [19].  
127 Biochemical and microscopy-based approaches are the current standard and have been  
128 widely utilized in the field. Recently, a reporter assay system exploiting the cytoplasmic  
129 exposure of a virion-associated mRNA was reported [92]. Previous work that identified  
130 key mutations in CA important for core stability [13, 16, 93] depended solely on an in

131 vitro core disassembly assay [13, 93]. While the increased rate of core disassembly in  
132 this system correlated with reverse transcription defects in cells, it is untested whether  
133 core disassembly also occurs in the context of cell infection. Microscopy-based  
134 experiments partially fill this gap and can provide single-cell level information about the  
135 kinetics of the early stages of virus replication [21, 22, 24, 25]. Such approaches are  
136 generally limited by the difficulty in distinguishing infectious from non-infectious virus  
137 particles, albeit more elaborate live-cell imaging approaches have recently been  
138 developed to address this shortcoming [22, 25]. Another limitation of microscopy-based  
139 approaches is their dependence on indirect labeling of core components. Biochemical  
140 separation of post-nuclear supernatants from infected cells, referred to as fate of  
141 capsid/core assay, addresses some of these shortcomings and provides an easily  
142 accessible alternative [90, 94, 95]. The main advantage of this approach is the ability to  
143 trace virtually every component of the HIV-1 core [90, 95], and bypass potential artifacts  
144 due to indirect labeling of CA or use of fusion proteins. However, as this approach is  
145 laborious and has inherent limitations due to the analysis of bulk cell lysates, it has not  
146 been widely adopted to study the effects of CA stability on core components in infected  
147 cells. Given the discrepancies between microscopy-based and biochemical approaches  
148 [21, 23, 30], and the pros and cons of each approach, it is advantageous to utilize  
149 complementary assays to study early post-entry events in the HIV-1 life cycle.

150 Here, we took an in depth approach to examine the effects of widely utilized CA  
151 stabilizing/destabilizing mutations and a CA targeting compound, C1 [91, 96, 97], on the  
152 physical properties of the CA lattice, virion architecture, and fates of core components in  
153 target cells. We found that CA destabilizing substitutions (P38A, K203A, Q219A)  
154 significantly decreased and a CA stabilizing E45A substitution increased the intrinsic  
155 stability of the CA lattice. Unstable CA mutants tended to increase the propensity to form  
156 eccentric particles with vRNPs mislocalized between the empty CA lattice and the lipid

157 envelope without impacting IN-RNA interactions. Most notably, we found that CA  
158 destabilizing mutations and C1 led to dissociation of CA from vRNPs in target cells,  
159 which was accompanied by the premature loss of the vRNA and the IN enzyme. Overall,  
160 our studies show that the CA lattice protects the viral core components from untimely  
161 degradation in target cells and provide the long sought causal link between core stability  
162 and reverse transcription.

163

## 164 **RESULTS**

### 165 **Effects of CA stability on general properties of HIV-1 virions**

166 We first assessed the effects of CA substitutions that were previously reported to  
167 decrease (i.e. P38A, Q63A/Q67A, K203A, Q219A) or increase (i.e. E45A) the stability of  
168 the CA lattice [13, 16] on HIV-1 replication. The locations of the targeted amino acid  
169 residues are dispersed throughout the hexameric CA structure, positioned at the NTD-  
170 NTD interface (Pro38 and Glu45) or NTD-CTD interface (Gln63A and Gln67) within the  
171 hexamer [4], or at the 3-fold CTD-CTD interhexameric interface (Lys203A and Gln219)  
172 [12] (Fig. 1A). Missense mutations were introduced into the replication-competent pNL4-  
173 3 molecular clone or NL4-3-derived Gag-Pol expression plasmid for use in subsequent  
174 assays described below. With the exception of the Q63A/Q67A substitutions, which  
175 substantially impaired particle release, none of the other changes measurably affected  
176 Gag expression, processing, or particle release (Fig. 1B, D). All substitutions decreased  
177 virus titers circa 10- to >100-fold (Fig. 1C, E), as expected from previous observations  
178 [13, 16]. In parallel, we assessed the effects of Compound 1 (C1) [91] on HIV-1  
179 replication. Addition of C1 to virus-producing cells decreased virus titers 10-20 fold (Fig.  
180 1F) without impacting Gag expression, processing (Fig. 1G, H), or particle release (Fig.  
181 1H). As previously noted [91], we observed a dose responsive decrease in the levels of

182 unprocessed Gag in virions, without any corresponding change in processed CA levels  
183 in virions (Fig. 1H).

184

### 185 **Effects of CA mutations on virion morphology and IN-RNA interactions**

186 Qualitative assessment of CA destabilizing substitutions on virion morphology  
187 has previously revealed the presence of mature particles with fully formed CA cones [13,  
188 16]. In contrast, CA destabilization by C1 increased the occurrence of eccentric particles  
189 in which vRNPs were mislocalized outside of the CA lattice [91]. Given these seemingly  
190 opposite effects, we wanted to reassess quantitatively the impact of CA destabilizing  
191 substitutions on virion morphology. As expected, thin-section electron microscopic  
192 (TEM) analysis of cell-free wild-type (WT) HIV-1 particles revealed that ~85% of the  
193 virions contained conical cores with centrally-located electron dense vRNPs (Fig. 2A, B).  
194 The remaining virions were classified as having either an immature or eccentric  
195 morphology with vRNPs localized between the viral membrane and an electron-lucent  
196 core (Fig. 2A, B). Most of the CA substitutions including P38A, E45A, Q63A/Q67A, and  
197 K203A significantly increased the occurrence of eccentric particles (Fig. 2A, B). The  
198 Q219A substitution also marginally enhanced the occurrence of the eccentric particle  
199 morphology (Fig. 2A, B).

200 Because loss of IN binding to the viral genome significantly extenuates eccentric  
201 particle morphology [63-65], we next investigated the extent of IN-RNA interactions  
202 within the different CA mutant viruses. IN-RNA complexes were immunoprecipitated  
203 from UV-crosslinked virions and the amount of vRNA bound by IN was assessed by end-  
204 labeling followed by separation of protein-RNA complexes by gel electrophoresis [63, 98,  
205 99]. Equivalent levels of IN-RNA complexes were isolated from WT virions and viruses  
206 bearing CA substitutions (Fig. 2C) or WT virus generated in the presence of C1 (Fig.



207 2D). Likewise, CA substitutions and C1 treatment did not seem to impact NC-RNA  
208 interactions in virions (Fig. 2C, D).

209

### 210 **Effects of CA substitutions on the intrinsic stability of the CA lattice**

211 The traditional approach to assess CA stability is based on isolation of cores  
212 from envelope-stripped virions followed by equilibrium density sedimentation on linear  
213 sucrose gradients, during which the cores migrate to denser fractions [13]. The fraction  
214 of CA in the dense fractions is assumed to directly correlate with the extent of uncoating,  
215 but the assay does not distinguish between contributions to overall core yield that arise  
216 from the intrinsic stability of the capsid lattice versus modulatory effects of other factors.  
217 To assess the impact of CA mutations on the intrinsic stability of the mature CA lattice,  
218 WT CA and CA proteins bearing the aforementioned substitutions were assembled into  
219 capsid-like tubes in vitro in the absence of any other viral or cellular factors, diluted, and  
220 analyzed by nano-differential scanning fluorimetry (nano-DSF) during thermal  
221 denaturation (Fig. 3A). Dilution of assembled tubes in this assay results in their partial  
222 disassembly, and we reasoned that the degree of disassembly would reflect the intrinsic  
223 stability of the CA structures. Given the low yield of particles obtained with CA mutant  
224 Q63A/Q67A (Fig 1B, D & Fig. 2C), this mutant was excluded from the remainder of the  
225 studies described below.

226 Comparison of unassembled WT CA (Fig. 3B) and assembled CA tubes (Fig. 3C,  
227 D) revealed the presence of the T3 species with greater thermal stability than initial T1  
228 and T2 populations following assembly (Fig. 3C, D). The P38A (Fig. 3E), K203A (Fig.  
229 3H), and Q219A (Fig. 3I) substitutions each decreased the levels of the stable T3  
230 species as evident by the skewing of the nano-DSF curves towards the left, consistent  
231 with a destabilizing effect on the capsid lattice. The opposite was true for the E45A  
232 substitution, which showed an increased proportion of the more stable species (Fig. 3G);

233 this result is indicative of lattice stabilization and is in line with previous observations  
234 [100]. Adding the T216I substitution (see Fig. 1 for Thr216 location) to P38A, which  
235 partially restored the P38A infectivity defect [101], similarly increased CA tube stability  
236 (Fig. 3F). Together, these results provide direct evidence that CA mutations can impact  
237 the intrinsic stability of the assembled CA lattice in the absence of other virion and core  
238 components.

239

#### 240 **Effects of CA mutations on core stability in vitro**

241 We next validated how modulation of CA alters core stability in virions by utilizing  
242 a biochemical assay in which the viral lipid envelope is stripped off by brief detergent  
243 treatment and core components are separated by equilibrium density sedimentation on  
244 linear sucrose cushions [90, 102]. Note that while similar approaches have been  
245 previously employed to study the stability of isolated CA mutants [13, 91, 103, 104], a  
246 side-by-side comparison of the effects of multiple CA substitutions on the behavior of  
247 different core components was lacking.

248 Following centrifugation of envelope-stripped virions, fractions collected from the  
249 top of the gradients were analyzed for the presence of CA, IN, MA, and RT activity. For  
250 WT viruses, a large fraction of CA migrated in top fractions representing soluble CA that  
251 has dissociated from the CA lattice during the assay and/or CA that was incorporated  
252 into virions but was not part of the CA lattice [26-28] (Fig. 4A, B). A second population of  
253 CA was present in dense fractions 7-10, representing CA that is in complex with dense  
254 vRNPs. The P38A, K203A, and Q219A substitutions as well as treatment with C1 each  
255 led to a substantial decrease in the levels of CA in dense fractions, whereas the E45A  
256 substitution tended to yield modestly higher levels of CA compared to WT viruses (Fig.  
257 4A, B, S1A). As anticipated, MA remained primarily in soluble fractions confirming the  
258 efficient removal of the viral lipid envelope (Fig. 4C). RT activity traces mirrored those of

259 CA protein, with 10-50-fold less RT activity in dense fractions upon destabilization of the  
260 CA lattice (Fig. 4D, S1B). IN (Fig. 4E, F) and vRNA (not shown) remained in dense  
261 fractions for all viruses, suggesting that CA mutations and C1 did not alter vRNP  
262 condensation, consistent the IN-RNA and NC-RNA binding profiles (Fig. 2C, D).

263 In contrast with its stabilizing effect on CA tubes (Fig. 3F), the T216I substitution  
264 that partially compensated the P38A infectivity defect did not counteract the loss of CA  
265 (Fig. 5A, B, S2A) or RT (Fig. 5C, S2B) in dense fractions, consistent with a previous  
266 study [103]. In contrast, the R132T substitution that conferred resistance to C1  
267 significantly increased the amount of CA (Fig. 5D, E, S2C) and RT (Fig. 5F, S2D) in  
268 dense fractions. As above, IN remained in dense fractions under all conditions (Fig. 5A,  
269 5D). Overall, these results indicate that decreasing the stability of the CA lattice can lead  
270 to dissociation of CA and RT from vRNPs, likely without impacting condensation of  
271 vRNPs by NC and IN.

272

### 273 **Destabilization of the CA lattice leads to loss of vRNPs in target cells**

274 The impact of CA destabilization on the fates of viral cores in infected cells is  
275 poorly studied. Of note, HIV-1 cores can be stabilized by cytosolic extracts in vitro [105],  
276 suggesting that core stability in cells may be different from what is predicted from in vitro  
277 assays. While elaborate and powerful microscopy-based approaches have recently been  
278 employed to fill this gap [21, 22, 24, 25], an important drawback of these approaches is  
279 their dependence on indirect labeling of core components and fusion proteins that may  
280 impact functionality. In addition, image-based studies have not assessed the impact of  
281 CA destabilization on vRNA and IN, which exist at comparatively lower copy numbers in  
282 virions. To fill this knowledge gap, we tracked the fates of individual core components in  
283 target cells by utilizing our previously developed biochemical assay [95]. In brief, CHO-  
284 derived pgsA-745 cells, which lack surface glycosaminoglycans and as a result can be

285 very efficiently infected by VSV-G-pseudotyped viruses, were synchronously infected  
286 with WT or CA mutant viruses. Two hours post-infection (hpi), post-nuclear lysates were  
287 separated on linear sucrose gradients and collected fractions were analyzed for viral  
288 proteins (i.e. CA, IN, RT) and viral genomic RNA or reverse transcription products by  
289 immunoblotting or Q-PCR-based assays, respectively.

290 In cells infected with WT viruses, CA migrated as two populations (Fig. 6A). The  
291 first population was present in the top two fractions corresponding to soluble CA proteins  
292 that have uncoated from the core or CA that was packaged into virions but was not part  
293 of the capsid lattice [26, 106]. A second population of CA was present in fractions 6-8,  
294 representing CA that is in complex with vRNPs and RTCs as evident by its co-migration  
295 with IN (Fig. 6B), vRNA (Fig. 6C), vDNA (Fig. 6D), and RT (Fig. S3). Notably, in line with  
296 the in vitro experiments, CA-destabilizing P38A, K203A, and Q219A substitutions led to  
297 loss of CA, whereas the CA-stabilizing E45A substitution yielded similar levels of CA  
298 compared to the WT in dense fractions (Fig. 6A). Notably, IN (Fig. 6B) and vRNA (Fig.  
299 6C, S4A) were lost from dense fractions without corresponding increases in soluble  
300 fractions upon CA destabilization. These changes expectedly led to substantially lower  
301 levels of reverse transcription products accumulating in cells (Fig. 6D, S4B). In line with  
302 results of Figures 5A-C, the P38A/T216I substitution did not appreciably restore the  
303 amount of CA in dense fractions (Fig. 6A), but did modestly increase the amount of IN  
304 (Fig. 6B), vRNA (Fig. 6C, S4A), and vDNA (Fig. 6D, S4B). Core destabilization by C1  
305 similarly reduced the amount of CA in dense fractions (Fig. 6E), which was accompanied  
306 by the loss of IN (Fig. 6F) and vRNA (Fig. 6G, S4C). Importantly, the R132T substitution,  
307 which confers resistance to C1, largely restored CA, IN, RNA, as well as reverse  
308 transcription products in dense fractions for viruses generated in the presence of C1  
309 (Fig. 6E-H, S4C, S4D).

310 To test whether accelerated loss of vRNA upon core destabilization holds true in  
311 a cell type relevant to HIV-1 infection, MT-4 T-cells were synchronously infected with  
312 VSV-G pseudotyped full-length viruses in the presence of the RT inhibitor nevirapine  
313 and levels of cell-associated vRNA assessed by Q-RT-PCR. In line with the above  
314 findings, premature loss of the genomic vRNA upon CA destabilization was apparent as  
315 early as 2 hpi (Fig. 7A). The viral genomic RNA continued to be lost at a faster rate for  
316 CA destabilizing mutations and C1 as compared to WT and E45A virus at later times in  
317 infection (Fig. 7A). Importantly, equivalent levels of vRNA were recovered from cells  
318 when virus entry was blocked through NH<sub>4</sub>Cl treatment (Fig. 7B). These results, together  
319 with a previous study that found no difference in the efficiency of VSV-G-mediated viral  
320 entry for WT and CA P38A, E45A, and K203A mutant viruses [107], suggest that the  
321 observed decrease in vRNA levels is dependent on viral entry. Taken together, these  
322 results support our findings from the fate of core assays (Fig. 6) and strongly argue for  
323 the role of the CA lattice in protecting vRNPs from degradation in target cells.

324

### 325 **Loss of vRNPs in target cells upon core destabilization is independent of** 326 **proteasomes**

327 We next tested whether the observed loss of vRNPs is mediated by  
328 proteasomes. Of note, it has been previously shown that IN is inherently unstable due to  
329 the presence of an N-terminal phenylalanine residue that leads to its proteasomal  
330 degradation when expressed alone in cells [108-112]. In agreement with data presented  
331 in Fig. 6, CA (Fig. 8A), IN (Fig. 8B), and vRNA (Fig. 8C, S5) were lost from dense  
332 fractions for the P38A destabilizing mutant and to a lesser extent for the P38A/T216I  
333 mutant virus. Although proteasome inhibition by MG132 treatment during infection  
334 modestly increased the levels of these components in mid-gradient fractions (Fig. 8A-C,  
335 S5), it had no impact on virus titers (Fig. 8D). Similar results were obtained with K203A

336 and Q219A substitutions whereby CA (Fig. S6A), IN (Fig. S6B), and vRNA (Fig. S6C)  
337 levels in mid fractions increased modestly upon proteasome inhibition, yet without  
338 detectable changes in virus titers (Fig. S6D).

339

## 340 **DISCUSSION**

341 In this study, we utilized complementary approaches to study the impact of CA  
342 destabilization on the physical properties of the CA lattice in vitro and in virions, and on  
343 the subsequent steps of virus replication in target cells. Our in depth study is the first to  
344 causally link how destabilization of the HIV-1 CA lattice leads to reverse transcription  
345 defects in target cells. In brief, we found that CA destabilization through multiple  
346 mutations and a small molecule compound (C1) all led to faster disassembly of the CA  
347 lattice and premature loss, possibly due to degradation, of the vRNA genome and IN in  
348 target cells (Fig. 9). Thus, we conclude that protection of vRNPs inside the CA lattice is  
349 crucial for reverse transcription as well as subsequent steps in HIV-1 replication.

350 In terms of the behavior of CA, our findings from fate of core assays are in  
351 perfect alignment with previous studies that utilized live cell microscopy approaches [21,  
352 24, 25]. For example, we found that as early as 2 hpi, the majority of virion-associated  
353 CA dissociates from the vRNPs of WT viruses. Expectedly, microscopy-based assays  
354 that rely on indirect labeling of CA have generally seen a quick loss of CA signal  
355 immediately after entry [21, 23-25]. We believe this loss is in part due to uncoating and  
356 in part due to the fact that only approximately one-third to one-half of CA monomers in  
357 virions form the CA lattice [26, 106], while the remainder diffuses in the cellular milieu  
358 upon entry. A third possibility is that CA dissociates from the core during our lysis and  
359 fractionation processes. Of note, inclusion of 10  $\mu$ M IP<sub>6</sub>, which impacts capsid assembly  
360 and stability in vitro [10, 11], throughout the fractionation process had no observable  
361 impact on the migration behavior of CA and other core components in sucrose gradients

362 (compare Fig. S7 and Fig. 4). Notwithstanding, a small fraction of CA remained  
363 associated with vRNPs and the RTC, which was responsive to and was lost upon  
364 destabilization of the CA lattice.

365 Our findings suggest that the main impact of CA destabilizing mutations is on the  
366 intrinsic stability of the CA lattice, which is largely in agreement with the core stability  
367 assessments in virions and in target cells. One exception was the P38A/T216I double  
368 mutant, which we found to be more intrinsically stable than WT in vitro, but was largely  
369 unstable in virion- and cell-based stability assays, in agreement with previous findings  
370 [101]. Notably, we consistently found higher levels of vRNA, IN, and RT products in  
371 dense fractions upon infection of target cells with the P38A/T216I mutant compared to  
372 the CA destabilizing P38A mutant, which is consistent with partial rescue of P38A  
373 infectivity. Our results suggest that the P38A/T216I substitution may slow down the rate  
374 or degree of core disassembly, allowing for intermediate levels of reverse transcription  
375 and infection.

376 Most notably, our study provides the first direct evidence that exposed vRNA and  
377 IN are both lost in target cells without the protection of the CA lattice. This is in contrast  
378 to a previous study that utilized an IN-superfolder GFP (IN-sfGFP) fusion protein to track  
379 RTCs in target cells [113], in which case IN levels did not seem to be affected upon core  
380 destabilization [21]. Possible explanations for this discrepancy include the effect of  
381 sfGFP fusion on IN function and stability, as well as the artificial introduction of the IN-  
382 sfGFP protein into virions through its fusion to Vpr. A separate study observed that the  
383 viral genomic RNA labeled with 5-ethynyl uridine was lost quicker from cells upon CA  
384 destabilization by the K203A mutant, and curiously, upon CA stabilization by the E45A  
385 change [23]. As this study assessed the stability of vRNA in the absence of RT  
386 inhibitors, it is possible that the faster loss of vRNAs with the E45A mutant is due to  
387 quicker rates of reverse transcription, and hence RNaseH-dependent degradation. Note

388 that we assessed the fates of vRNAs in the presence of RT inhibitor nevirapine to  
389 precisely address this problem and circumvent RNaseH-dependent degradation of the  
390 vRNA genome during reverse transcription. In addition, we believe that the direct  
391 assessment of the behavior of the vRNA genome is another technical strength of our  
392 study.

393 The study of retroviral infection is inherently complicated by the fact that a large  
394 fraction of physical particles that enter cells are non-infectious. As a result, it is often  
395 assumed that the majority of the infection events studied in biochemical experiments,  
396 which depend on the analysis of bulk infected cells, are largely composed of non-  
397 infectious viruses [19]. However, we believe that using pgsA-745 cells, which can be  
398 very efficiently infected with VSV-G pseudotyped particles (as also observed by others  
399 [25]), together with synchronizing the infections, largely mitigates this problem. In fact,  
400 while we cannot exclude the possibility that the dense CA containing vRNP complexes  
401 that we detect in fate of core assays (Fig, 6, 8) are blocked at downstream events  
402 following reverse transcription, they appear to be capable of at least completing reverse  
403 transcription. This is based on two observations. First, levels of vRNA detected  
404 throughout the gradient decreased substantially if RT inhibitors were omitted during  
405 infection, suggesting their efficient reverse transcription (data not shown). This also  
406 indicates that the amount of viruses trapped in endosomes, which would appear in  
407 middle membrane-containing fractions of the gradients, or viruses being degraded,  
408 which would appear in top fractions containing soluble proteins and RNA molecules, is  
409 relatively low under these conditions. Second, assuming that the intermediate  
410 processing steps work at similar efficiency, the copy numbers of vRNA and vDNA were  
411 similar, again suggesting the efficient conversion of vRNA to vDNA by RT.

412 We have previously shown that HIV-1 IN exhibits a key, non-catalytic role in  
413 particle maturation that involves its binding to the vRNA genome [63]. Inhibition of IN-



414 RNA interactions leads to mislocalization of vRNPs outside of the CA lattice [63], and  
415 subsequent loss of both the vRNA genome and IN in target cells [90]. Similar loss of the  
416 vRNA and IN upon destabilization of the CA lattice, without any apparent effect on IN-  
417 RNA and NC-RNA interactions, strongly suggests that it is protection by the CA lattice  
418 that matters for the stability of vRNPs as opposed to IN-RNA interaction *per se*.

419 It remains unknown why the unprotected vRNA and IN are prematurely lost in  
420 target cells. One possible hypothesis is that HIV-1 RNAs are inherently unstable due to  
421 their AU-rich nucleotide content [114-116], similar to certain cellular mRNAs encoding for  
422 cytokines and growth factors [117]. Another is that virion-associated enzymes nick and  
423 deadenylate vRNAs in virions [118-120], predisposing them to degradation upon  
424 entering target cells. While IN undergoes proteasomal degradation when ectopically  
425 expressed alone in cells [108-112], we have found that proteasome inhibition does not  
426 rescue the loss of vRNA or IN during infection (Fig. 8 & [90]). Whether the premature  
427 loss of unprotected vRNA and IN from infected cells is due to another cellular  
428 mechanism or inherent instability of vRNPs remains to be determined.

429 Our findings may have implications for how HIV-1 nucleic acids are recognized in  
430 infected cells by host innate sensors. Shielding of the vRNPs and the resulting reverse  
431 transcription products by CA has been proposed to prevent their recognition by cytosolic  
432 nucleic acid sensors in immune cells subsets such as dendritic cells and macrophages  
433 [53, 56]. For example, perturbation of CA interactions with host cell factors cyclophilin A  
434 (CypA) and cleavage and polyadenylation specificity factor subunit 6 (CPSF6) can  
435 trigger innate immune responses and interferon (IFN) production in macrophages [55]  
436 and monocyte-derived dendritic cells [54]. However the extent of type-I IFN production  
437 upon sensing has been variable and dependent on cell-type and culture conditions [121].  
438 For instance, the lack of a robust type I IFN response upon HIV-1 infection of  
439 macrophages can be explained by degradation of excess reverse transcription products

440 by the cytosolic exonuclease TREX1 [122], as well as negative regulation of host factors  
441 by viral accessory proteins [123]. In other settings, cyclic guanosine monophosphate–  
442 adenosine monophosphate synthase (cGAS) and the adaptor protein stimulator of  
443 interferon genes (STING), as well as other regulators and downstream effectors, have  
444 been proposed to be involved in recognition of HIV-1 DNA [52, 124, 125]. It will be  
445 important in the future to determine whether the time window between the exposure of  
446 vRNPs and their degradation is sufficiently long to allow innate immune recognition to  
447 occur.

448 Overall, our findings highlight a critical role for the CA lattice in protecting vRNPs  
449 from premature degradation in target cells and causally link how CA stability may impact  
450 reverse transcription. Given the broad network of essential interactions between CA  
451 molecules within the lattice and cellular factors in target cells, HIV-1 CA is emerging as a  
452 viable new target for anti-retroviral therapy [17]. Compounds that target CA can disrupt  
453 the assembly of the CA lattice and particle morphogenesis [91, 126-129], alter the  
454 stability of the CA lattice and/or uncoating [91, 130-132], and inhibit reverse transcription  
455 [91, 126, 129, 130, 132, 133] and nuclear entry [134-136] in target cells. Expectedly, CA  
456 is highly sensitive to mutations [137], making it an exceptionally viable drug target as  
457 resistance mutations would likely come at a high fitness cost to the virus.

458

## 459 **MATERIALS AND METHODS**

### 460 **Chemicals and reagents**

461 Standard laboratory chemicals were obtained from reputable suppliers such as Sigma-  
462 Aldrich. The RT inhibitor nevirapine was obtained from the NIH AIDS Repository, while  
463 compound C1 was synthesized as described previously [90].

### 464 **Plasmids**

465 The pNLGP plasmid consisting of the HIV-1<sub>NL4-3</sub>-derived Gag-Pol sequence inserted into  
466 the pCR/V1 plasmid backbone [138] and the CCGW vector genome plasmid carrying a  
467 GFP reporter under the control of the CMV promoter [139, 140] were previously  
468 described. Mutations in the CA coding sequence were introduced into both the pNLGP  
469 plasmid and pNL4-3 by overlap extension PCR. Briefly, forward and reverse primers  
470 containing CA mutations were used in PCR reactions with antisense and sense outer  
471 primers containing unique restriction endonuclease sites (EcoRI-sense, NotI-antisense  
472 for NLGP and BssHII-sense-SphI-antisense or SphI-sense-AgeI-antisense for pNL4-3),  
473 respectively. The resulting fragments containing CA mutations were mixed at 1:1 ratio  
474 and overlapped subsequently using the outer sense and antisense primer pairs. PCR  
475 products were digested with the corresponding restriction endonucleases and ligated  
476 with appropriately digested pNLGP or pNL4-3 plasmid vector fragments. Presence of  
477 engineered mutations and lack of unwanted extraneous mutations were verified by  
478 Sanger sequencing.

479

#### 480 **Cells and viruses**

481 HEK293T cells (ATCC CRL-11268) and HeLa-derived TZM-bl cells (NIH AIDS Reagent  
482 Program) were maintained in Dulbecco's modified Eagle's medium supplemented with  
483 10% fetal bovine serum. CHO K1-derived pgsA-745 cells (CRL-2242, ATCC) were  
484 maintained in Dulbecco's modified Eagle's / F12 (1:1) media supplemented with 10%  
485 fetal bovine serum and 1 mM L-glutamine. MT-4 T cells (NIH AIDS Reagents) were  
486 grown in RPMI media supplemented with 10% fetal bovine serum. Vesicular stomatitis  
487 virus G protein (VSV-G)-pseudotyped virus-like particles (VLPs) were produced by  
488 transfection of HEK293T cells with pNLGP-derived plasmids, the CCGW vector genome  
489 carrying GFP, and VSV-G expression plasmid at a ratio of 5:5:1, respectively, using  
490 polyethyleneimine (PolySciences, Warrington, PA). VSV-G-pseudotyped viruses were

491 produced by transfecting HEK293T cells with the pNL4-3-derived plasmids and VSV-G  
492 plasmid at a ratio of 4:1 (pNL4-3:VSV-G).

493

#### 494 **Immunoblotting**

495 Viral and cell lysates were resuspended in SDS sample buffer and separated by  
496 electrophoresis on Bolt 4-12% Bis-Tris Plus gels (Life Technologies), blotted onto  
497 nitrocellulose membranes, and probed with the following antibodies: mouse monoclonal  
498 anti-HIV p24 antibody (183-H12-5C, NIH AIDS reagents), mouse monoclonal anti-HIV IN  
499 antibody [141], rabbit polyclonal anti-HIV IN antibody raised in-house against the Q44-  
500 LKGEAMHGQVD-C56 peptide. Blots were then probed with fluorophore-conjugated  
501 secondary antibodies (LI-COR) and scanned using a LI-COR Odyssey system. IN and  
502 CA levels in virions were quantified using the Image Studio software.

503

#### 504 **Equilibrium density sedimentation of virion core components *in vitro***

505 Equilibrium density sedimentation of virion core components was performed as  
506 previously described [90]. Briefly, HEK293T cells grown on 10-cm dishes were  
507 transfected with NLGP or derivative plasmids. Two days post-transfection, cell-free  
508 virions collected from cell culture supernatants were pelleted through a 20% sucrose  
509 cushion. Pelleted VLPs were resuspended in 1x PBS and treated with 0.5% Triton X-100  
510 for 2 min at room temperature. Immediately after, samples were layered on top of 30-  
511 70% linear sucrose gradients in 1X STE buffer (100 mM NaCl, 10 mM Tris-Cl (pH 8.0), 1  
512 mM EDTA) and centrifuged for 16 h at 4°C and 28500 rpm, respectively, using an  
513 SW55Ti rotor. Fractions (500 µL) collected from the top were analyzed for IN by  
514 immunoblotting using a mouse monoclonal anti-IN antibody [141], anti-HIV p24 antibody  
515 (183-H12-5C, NIH AIDS reagents), rabbit polyclonal anti-MA antibody (4811, NIH AIDS  
516 reagents), and Q-PCR-based assays for RT activity [142] and vRNA.

517 **Analysis of virion core components in infected cells**

518 Biochemical analysis of retroviral cores in infected cells was performed as  
519 described previously [95]. Briefly, pgsA-745 cells were mixed with VSV-G pseudotyped  
520 single cycle GFP-reporter viruses or its derivatives at 4°C. Following the removal of virus  
521 inoculum and extensive washes with 1X PBS, cells were incubated at 37°C for 2 h. For  
522 analysis of vRNA, 25 µM nevirapine was included throughout the infections to prevent its  
523 degradation during reverse transcription due to RNase H activity. Post-nuclear  
524 supernatants were separated by ultracentrifugation on 10-50% linear sucrose gradients  
525 using a SW50.1 rotor at 30,000 rpm for 1 h. Ten 500 µl fractions from the top of the  
526 gradient were collected, and CA, IN, RT activity, vRNA and vDNA in each fraction were  
527 analyzed by either immunoblotting or Q-PCR as above and detailed in [95].

528 **Virus production and transmission electron microscopy**

529 Cell-free HIV-1 virions were isolated from transfected HEK293T cells. Briefly, cells grown  
530 in two 15-cm dishes ( $10^7$  cells per dish) were transfected with 30 µg full-length proviral  
531 plasmid DNA containing the WT sequence or indicated CA mutations using PolyJet DNA  
532 transfection reagent as recommended by the manufacturer (SignaGen Laboratories).  
533 Two days after transfection, cell supernatants were filtered through 0.22 µm filters and  
534 pelleted by ultracentrifugation using a Beckman SW32-Ti rotor at 26,000 rpm for 2 h at 4  
535 °C. Fixative (2.5% glutaraldehyde, 1.25% paraformaldehyde, 0.03% picric acid, 0.1 M  
536 sodium cacodylate, pH 7.4) was gently added to resulting pellets, and samples were  
537 incubated overnight at 4 °C. The following steps were conducted at the Harvard Medical  
538 School Electron Microscopy core facility. Samples were washed with 0.1 M sodium  
539 cacodylate, pH 7.4 and postfixed with 1% osmium tetroxide /1.5% potassium  
540 ferrocyanide for 1 h, washed twice with water, once with maleate buffer (MB), and  
541 incubated in 1% uranyl acetate in MB for 1 h. Samples washed twice with water were

542 dehydrated in ethanol by subsequent 10 min incubations with 50%, 70%, 90%, and then  
543 twice with 100%. The samples were then placed in propyleneoxide for 1 h and infiltrated  
544 overnight in a 1:1 mixture of propyleneoxide and TAAB Epon (Marivac Canada Inc.). The  
545 following day the samples were embedded in TAAB Epon and polymerized at 60 °C for  
546 48 h. Ultrathin sections (about 60 nm) were cut on a Reichert Ultracut-S microtome,  
547 transferred to copper grids stained with lead citrate, and examined in a JEOL 1200EX  
548 transmission electron microscope with images recorded on an AMT 2k CCD camera.  
549 Images were captured at 30,000 x magnification, and over 100 viral particles per sample  
550 were counted by visual inspection.

#### 551 **Nano differential scanning fluorimetry (NanoDSF) analysis of CA assemblies**

552 Purified HIV-1 CA proteins (WT, P38A, P38A/T216I, E45A, K203A, and Q219A) were  
553 obtained using published protocols [143]. CA tubes were assembled by incubating  
554 protein (~10 mg/mL) in 50 mM Tris, pH 8.0, 1 M NaCl, 20 mM β-mercaptoethanol for 2 h  
555 at 37 °C. Unassembled protein were removed by centrifugation, and samples were then  
556 diluted 10-fold into the same buffer and incubated for 10 min at room temperature prior  
557 to loading onto nano-capillaries. NanoDSF profiles were measured with a Tycho system  
558 (Nanotemper). The first derivative profiles were then fit as a sum of Gaussian curves in  
559 Excel (Microsoft).

560

#### 561 **Analysis of vRNA in synchronously infected MT4 cells**

562 MT4 cells ( $3-6 \times 10^6$ ) were cooled to 4°C and infected with HIV-1<sub>NL4-3</sub>/VSV-G in the  
563 presence of 5 μM polybrene and 25 μM nevirapine. Equivalent number of particles for  
564 CA mutant viruses (as normalized by RT activity) was used to infect cells in parallel.  
565 Cells were incubated with viruses at 4°C for 30 min to allow binding, followed by three  
566 washes with ice-cold 1xPBS to remove unbound virus. Cells were then shifted to 37°C in  
567 the presence of 25 μM nevirapine to allow virus entry. In some experiments 50 mM

568 ammonium chloride was included at this stage to prevent endosome acidification, and  
569 hence viral entry. Infected cells were collected at 0, 2, 4, 6 and 24 hpi and RNA was  
570 extracted by Trizol. Resulting RNA was reverse transcribed and subjected to Q-PCR  
571 analysis for viral genomic RNA.

## 572 **FIGURE LEGENDS**

573 **Figure 1. CA stability mutants and compound 1 (C1)-treated viruses. (A)** Location of  
574 CA mutations depicted on the top view of the CA hexamer crystal structure (PDB 4XFX  
575 [144]). Close-up of two adjacent CA subunits, colored in gray and yellow with substituted  
576 residues shown as colored spheres, is depicted on the right. **(B, C)** HEK293T cells were  
577 transfected with pNL4-3 bearing the indicated CA mutations. Cell lysates and purified  
578 virions were harvested two days post transfection and analyzed by immunoblotting for  
579 CA, NC, IN and RT (B). Virus titers were determined on TZM-bl cells (C). **(D, E)**  
580 HEK293T cells were transfected with NLGP-expression plasmid bearing the indicated  
581 CA mutations alongside a packagable vRNA (V1B) and VSV-G expression plasmid. Cell  
582 lysates and purified virions were harvested two days post transfection and analyzed by  
583 immunoblotting for CA, NC and IN (D), and virus titers were determined on TZM-bl cells  
584 (E). **(F-H)** HEK293T cells transfected with pNL4-3 were treated with indicated  
585 concentrations of C1. Resulting virus titers were determined using TZM-bl cells (F). Cell  
586 lysates (G) and purified virions (H) were harvested two days post transfection and  
587 analyzed by immunoblotting for CA, NC and IN. Data in A-H is representative of 2-4  
588 independent experiments.

589 **Figure 2. CA stability mutants alter particle morphology but not IN-RNA and NC-**  
590 **RNA complex formation. (A)** Representative TEM images of WT and CA mutant HIV-  
591 1<sub>NL4-3</sub> virions. Magnification is 30,000x (scale bar, 100 nm). Black arrows indicate mature  
592 particles containing conical or round cores with associated electron density; triangles  
593 indicate eccentric particles with electron dense material situated between translucent

594 cores and the viral membrane; diamonds indicate immature particles. **(B)** Quantification  
595 of virion morphologies from two independent experiments (average  $\pm$  SD; more than 100  
596 particles counted per experiment). Significance of differences versus matched WT  
597 morphology was assessed by t-test.  $p < 0.05$  (\*),  $p < 0.01$  (\*\*),  $p < 0.001$  (\*\*\*),  
598  $p < 0.0001$  (\*\*\*\*). **(C, D)** Representative autoradiograms of IN-RNA and NC-RNA adducts  
599 immunoprecipitated from WT or CA mutant HIV-1<sub>NL4-3</sub> virions (C) or HIV-1<sub>NL4-3</sub> virions  
600 generated from cells treated with 100  $\mu$ M C1 (D). The amount of immunoprecipitated  
601 material was normalized such that equivalent levels of WT and mutant IN proteins were  
602 loaded on the gel, as also evident in the immunoblots shown below. Levels of IN, NC  
603 and CA in input virion lysates is shown in the lower immunoblots. Data are  
604 representative of three independent replicates.

605 **Figure 3. Estimation of relative intrinsic CA tube stability.** (A) Schematic of the  
606 nanoDSF assay. Assembled tubes were diluted 10-fold into assembly buffer and the  
607 thermal melting profile of the sample was measured. (B) The first derivative profile (black  
608 circles) of unassembled WT protein control can be deconvoluted into two component  
609 peaks of distinct melting points, indicated by T1 and T2. The components, which we  
610 assign to the NTD (T2) and CTD (T1), are modeled as Gaussian curves (gray). The sum  
611 of the Gaussian components is shown by the red curve. (C) The profile of assembled  
612 WT CA tubes contains an additional, third component with a higher melting point (T3),  
613 which arises from the fraction of protein that remained assembled after dilution. The  
614 height of the T3 Gaussian component compared to T2 and T1 indicates the relative  
615 proportion of intact tubes that remained after dilution, and is therefore a direct readout of  
616 intrinsic CA lattice stability. (D-I) Profiles of the indicated mutants. Data is representative  
617 of two independent biological replicates.

618 **Figure 4. Effects of CA mutations and C1 on the stability of HIV-1 cores in vitro.**  
619 HIV-1<sub>NL4-3</sub>-derived virions bearing the indicated CA mutations or grown in the presence of



620 100  $\mu$ M C1 were subjected to equilibrium density sedimentation following treatment with  
621 0.5% Triton as detailed in Materials & Methods. Ten fractions collected from the top of  
622 the sucrose gradients were analyzed for CA (A, B), MA (C), RT (D), and IN (E, F) by  
623 immunoblotting or a Q-PCR-based RT activity assay. Results in B & D (mean values  $\pm$   
624 SEM) quantify CA content and RT activity from three independent biological replicate  
625 experiments; panel F quantifies the results of one of three representative IN  
626 immunoblots.

627 **Figure 5. Analyses of compensatory CA mutant viruses. (A-C)** HIV-1<sub>NL4-3</sub>-derived  
628 virions bearing P38A or P38A/T216A substitutions were subjected to equilibrium density  
629 sedimentation as in Fig. 4. Ten fractions collected from the top of the sucrose gradients  
630 were analyzed for CA (A, B), IN (A) and RT (C) by immunoblotting or a Q-PCR-based  
631 RT activity assay. **(D-F)** WT and HIV-1<sub>NL4-3</sub>-derived virions bearing the CA R132T  
632 substitution that confers resistance to C1 were generated in the presence of 100  $\mu$ M C1  
633 and subjected to equilibrium density sedimentation as in Fig. 4. CA (D, E), IN (D) and RT  
634 (F) in collected fractions were detected by immunoblotting or a Q-PCR-based RT activity  
635 assay. Data in A and D are representative of four independent experiments. Data in B,  
636 C, E, F (mean values  $\pm$  SEM) show the quantitation of CA immunoblots and RT activity  
637 over four independent experiments.

638 **Figure 6. Fates of viral cores with altered stabilities in infected cells.** PgsA-745  
639 cells were synchronously infected with VSV-G pseudotyped GFP reporter HIV-1 bearing  
640 the indicated CA substitutions (A-D) or generated in the presence of 100  $\mu$ M C1 (E-H).  
641 Cells were processed at 2 hpi as explained in Materials and Methods. Proteins in  
642 fractions were analyzed by western blotting using antibodies against CA-p24 (A, E) and  
643 IN (B, F). Nucleic acids detected by PCR are shown in panels C and G (vRNA) and D  
644 and H (vDNA). Immunoblots in A, B, E, F are representative of three independent

645 experiments. Data in C, D, G, H show mean values from three independent experiments,  
646 with error bars representing the SEM.

647 **Figure 7. Destabilization of the CA lattice leads to the loss of vRNAs in target**  
648 **cells. (A,B)** MT4 cells were synchronously infected with HIV-1<sub>NL4-3</sub>/VSV-G at the MOI of  
649 1 i.u./cell for WT (equivalent particle numbers as normalized by RT activity was used for  
650 the mutants). Following synchronization, cells were shifted to 37 °C in the presence of  
651 25 µM nevirapine (A) or 25 µM nevirapine and 50 mM ammonium chloride (B). Cell-  
652 associated vRNA at indicated time-points was analyzed by Q-RT-PCR. Data in A and B  
653 are normalized relative to the amount of RNA detected at T=0 and T=2 hpi, respectively,  
654 for each virus. Data are from six independent experiments. Wilcoxon matched-pairs  
655 signed rank test was performed to assign significance (\*, p<0.05).

656  
657 **Figure 8. Inhibition of proteasomes does not rescue the degradation of viral cores**  
658 **with decreased stability.** PgsA-745 cells were synchronously infected with the  
659 indicated WT or CA mutant virus in the absence or presence (- or +) of 2 µM MG132,  
660 and infected cells were processed at 2 hpi. Proteins in fractions were analyzed by  
661 western blotting using antibodies against CA (A) and IN (B); vRNA was analyzed by Q-  
662 RT-PCR (C). Viral titers from a representative experiment are shown in (D). Data are  
663 derived from three independent experiments with error bars representing the SEM.

664 **Figure 9. Model of how CA stability affects downstream events in HIV-1**  
665 **replication.**

666 **Figure S1-Supplementary to Figure 4: Statistical analysis of the data presented in**  
667 **Figure 4.** Ratio paired one-tailed t-test was performed to determine statistically  
668 significant decreases (black asterisks) compared to WT/mock sample in CA (A) and RT  
669 (B) levels in fractions 7-10. p<0.05 (\*), p<0.01 (\*\*), p<0.001 (\*\*\*).

670 **Figure S2-Supplementary to Figure 5: Statistical analysis of the data presented in**  
671 **Figure 5.** Ordinary one-way ANOVA analysis was performed to determine statistically  
672 significant changes in CA (A, C) and RT (B, D) levels in fractions 7-10. Significant  
673 differences compared to the WT sample are denoted in black asterisks. Differences  
674 between P38A vs. P38A/T216I mutants (A, B), and WT/C1 vs. R132T/C1 (C, D)  
675 samples, were assessed by unpaired two-tailed t-test. These significance levels are  
676 indicated in red asterisks. ns, not significant ( $p>0.05$ );  $p<0.05$  (\*),  $p<0.01$  (\*\*),  $p<0.001$   
677 (\*\*\*),  $p<0.0001$ (\*\*\*\*).

678 **Figure S3-Supplementary to Figure 6: Fates of viral RT with altered stabilities in**  
679 **infected cells.** PgsA-745 cells were synchronously infected with VSV-G pseudotyped  
680 GFP reporter HIV-1, bearing the indicated CA substitutions. RT activity in fractions were  
681 analyzed by a Q-PCR-based assay. Data is from three independent experiments.

682 **Figure S4-Supplementary to Figure 6: Statistical analysis of the data presented in**  
683 **Figure 6.** Ordinary one-way ANOVA analysis was performed to determine statistically  
684 significant changes in RNA (A, C) and DNA levels (B, D) in fractions 6-8. Significant  
685 differences compared to the WT sample are denoted in black asterisks. Differences  
686 between P38A vs. P38A/T216I mutants (A, B) and WT/C1 and R132T/C1 (C, D)  
687 samples were assessed by unpaired two-tailed t-test, with these significance levels  
688 indicated in red.  $p<0.05$  (\*),  $p<0.01$  (\*\*),  $p<0.001$  (\*\*).

689 **Figure S5-Supplementary to Figure 8: Statistical analysis of the data presented in**  
690 **Figure 8.** Ordinary one-way ANOVA analysis was performed to determine statistically  
691 significant changes in RNA levels in fractions 4-9. Differences relative to the WT (+)  
692 sample are denoted in black asterisks, and differences resulting from MG132 treatment  
693 are indicated in red. ns, not significant ( $p>0.05$ );  $p<0.05$  (\*),  $p<0.01$  (\*\*),  $p<0.001$  (\*\*\*),  
694  $p<0.0001$ (\*\*\*\*).

695 **Figure S6-Supplementary to Figure 8. Inhibition of proteasomes does not rescue**  
696 **the degradation of viral cores with decreased stability.** PgsA-745 cells were  
697 synchronously infected with VSV-G pseudotyped GFP reporter HIV-1 bearing the  
698 indicated CA substitutions in the absence or presence of 2  $\mu$ M MG132, and infected  
699 cells were processed at 2 hpi. Proteins in fractions were analyzed by western blotting  
700 using antibodies against CA (A) and IN (B). Viral RNA in collected fractions was  
701 analyzed by Q-RT-PCR (C). Viral titers from a representative experiments are shown in  
702 (D). Data are derived from three independent experiments with error bars representing  
703 the SEM.

704 **Figure S7- Effects of CA mutations and C1 on the stability of HIV-1 cores in vitro**  
705 **and the impact of IP<sub>6</sub>.** Indicated CA mutant viruses or WT grown in the presence of 100  
706  $\mu$ M C1 were subjected to equilibrium density sedimentation following treatment with  
707 0.5% Triton. Both the lysis buffer and gradients were supplemented with 10 mM IP<sub>6</sub>. Ten  
708 fractions collected from the top of the sucrose gradients were analyzed for CA (A, B),  
709 MA (C), RT (D), and IN (E, F) by immunoblotting or a Q-PCR-based RT activity assay.  
710 Data are representative of two independent experiments.

711 **ACKNOWLEDGEMENTS:** We thank Dr. Michael Malim for providing the anti-IN  
712 monoclonal antibody. This study was supported by NIH grants U54AI150470 (the Center  
713 for HIV RNA Studies) and AI150497 to SBK, F31AI143389 fellowship to JLE, AI129678  
714 and AI150479 to OP, and P50AI150481 (Pittsburgh Center for HIV Protein Interactions)  
715 and AI070042 to ANE.

716  
717 **REFERENCES**  
718

- 719 1. Freed, E.O., *HIV-1 assembly, release and maturation*. Nat Rev Microbiol, 2015.  
720 13(8): p. 484-96.
- 721 2. Sundquist, W.I. and H.G. Krausslich, *HIV-1 assembly, budding, and maturation*.  
722 Cold Spring Harb Perspect Med, 2012. 2(7): p. a006924.

- 723 3. Mattei, S., F.K. Schur, and J.A. Briggs, *Retrovirus maturation-an extraordinary*  
724 *structural transformation*. *Curr Opin Virol*, 2016. **18**: p. 27-35.
- 725 4. Pornillos, O., et al., *X-ray structures of the hexameric building block of the HIV*  
726 *capsid*. *Cell*, 2009. **137**(7): p. 1282-92.
- 727 5. Pornillos, O., B.K. Ganser-Pornillos, and M. Yeager, *Atomic-level modelling of*  
728 *the HIV capsid*. *Nature*, 2011. **469**(7330): p. 424-7.
- 729 6. Briggs, J.A. and H.G. Krausslich, *The molecular architecture of HIV*. *J Mol Biol*,  
730 2011. **410**(4): p. 491-500.
- 731 7. Ganser-Pornillos, B.K., M. Yeager, and O. Pornillos, *Assembly and architecture*  
732 *of HIV*. *Adv Exp Med Biol*, 2012. **726**: p. 441-65.
- 733 8. Perilla, J.R. and A.M. Gronenborn, *Molecular Architecture of the Retroviral*  
734 *Capsid*. *Trends Biochem Sci*, 2016. **41**(5): p. 410-420.
- 735 9. Mattei, S., et al., *The structure and flexibility of conical HIV-1 capsids*  
736 *determined within intact virions*. *Science*, 2016. **354**(6318): p. 1434-1437.
- 737 10. Dick, R.A., et al., *Inositol phosphates are assembly co-factors for HIV-1*. *Nature*,  
738 2018. **560**(7719): p. 509-512.
- 739 11. Mallery, D.L., et al., *IP6 is an HIV pocket factor that prevents capsid collapse*  
740 *and promotes DNA synthesis*. *Elife*, 2018. **7**.
- 741 12. Byeon, I.J., et al., *Structural convergence between Cryo-EM and NMR reveals*  
742 *intersubunit interactions critical for HIV-1 capsid function*. *Cell*, 2009. **139**(4):  
743 p. 780-90.
- 744 13. Forshey, B.M., et al., *Formation of a human immunodeficiency virus type 1 core*  
745 *of optimal stability is crucial for viral replication*. *J Virol*, 2002. **76**(11): p.  
746 5667-77.
- 747 14. Yufenyuy, E.L. and C. Aiken, *The NTD-CTD intersubunit interface plays a*  
748 *critical role in assembly and stabilization of the HIV-1 capsid*. *Retrovirology*,  
749 2013. **10**: p. 29.
- 750 15. Zhao, G., et al., *Mature HIV-1 capsid structure by cryo-electron microscopy and*  
751 *all-atom molecular dynamics*. *Nature*, 2013. **497**(7451): p. 643-6.
- 752 16. von Schwedler, U.K., et al., *Functional surfaces of the human immunodeficiency*  
753 *virus type 1 capsid protein*. *J Virol*, 2003. **77**(9): p. 5439-50.
- 754 17. Carnes, S.K., J.H. Sheehan, and C. Aiken, *Inhibitors of the HIV-1 capsid, a target*  
755 *of opportunity*. *Curr Opin HIV AIDS*, 2018. **13**(4): p. 359-365.
- 756 18. Arhel, N., *Revisiting HIV-1 uncoating*. *Retrovirology*, 2010. **7**: p. 96.
- 757 19. Campbell, E.M. and T.J. Hope, *HIV-1 capsid: the multifaceted key player in HIV-*  
758 *1 infection*. *Nat Rev Microbiol*, 2015. **13**(8): p. 471-83.
- 759 20. Ambrose, Z. and C. Aiken, *HIV-1 uncoating: connection to nuclear entry and*  
760 *regulation by host proteins*. *Virology*, 2014. **454-455**: p. 371-9.
- 761 21. Francis, A.C., et al., *Time-Resolved Imaging of Single HIV-1 Uncoating In Vitro*  
762 *and in Living Cells*. *PLoS Pathog*, 2016. **12**(6): p. e1005709.
- 763 22. Mamede, J.I. and T.J. Hope, *Detection and Tracking of Dual-Labeled HIV*  
764 *Particles Using Wide-Field Live Cell Imaging to Follow Viral Core Integrity*.  
765 *Methods Mol Biol*, 2016. **1354**: p. 49-59.
- 766 23. Xu, H., et al., *Evidence for biphasic uncoating during HIV-1 infection from a*  
767 *novel imaging assay*. *Retrovirology*, 2013. **10**: p. 70.

- 768 24. Francis, A.C. and G.B. Melikyan, *Single HIV-1 Imaging Reveals Progression of*  
769 *Infection through CA-Dependent Steps of Docking at the Nuclear Pore,*  
770 *Uncoating, and Nuclear Transport.* Cell Host Microbe, 2018. **23**(4): p. 536-548  
771 e6.
- 772 25. Mamede, J.I., et al., *Early cytoplasmic uncoating is associated with infectivity of*  
773 *HIV-1.* Proc Natl Acad Sci U S A, 2017. **114**(34): p. E7169-E7178.
- 774 26. Briggs, J.A., et al., *The stoichiometry of Gag protein in HIV-1.* Nat Struct Mol  
775 Biol, 2004. **11**(7): p. 672-5.
- 776 27. Briggs, J.A., et al., *Structural organization of authentic, mature HIV-1 virions*  
777 *and cores.* EMBO J, 2003. **22**(7): p. 1707-15.
- 778 28. Lanman, J., et al., *Key interactions in HIV-1 maturation identified by hydrogen-*  
779 *deuterium exchange.* Nat Struct Mol Biol, 2004. **11**(7): p. 676-7.
- 780 29. Marquez, C.L., et al., *Kinetics of HIV-1 capsid uncoating revealed by single-*  
781 *molecule analysis.* Elife, 2018. **7**.
- 782 30. Hulme, A.E. and T.J. Hope, *The cyclosporin A washout assay to detect HIV-1*  
783 *uncoating in infected cells.* Methods Mol Biol, 2014. **1087**: p. 37-46.
- 784 31. Hulme, A.E., O. Perez, and T.J. Hope, *Complementary assays reveal a*  
785 *relationship between HIV-1 uncoating and reverse transcription.* Proc Natl  
786 Acad Sci U S A, 2011. **108**(24): p. 9975-80.
- 787 32. Arfi, V., et al., *Characterization of the behavior of functional viral genomes*  
788 *during the early steps of human immunodeficiency virus type 1 infection.* J  
789 Virol, 2009. **83**(15): p. 7524-35.
- 790 33. Yamashita, M. and A.N. Engelman, *Capsid-Dependent Host Factors in HIV-1*  
791 *Infection.* Trends Microbiol, 2017. **25**(9): p. 741-755.
- 792 34. Hilditch, L. and G.J. Towers, *A model for cofactor use during HIV-1 reverse*  
793 *transcription and nuclear entry.* Curr Opin Virol, 2014. **4**: p. 32-6.
- 794 35. Lee, K., et al., *Flexible use of nuclear import pathways by HIV-1.* Cell Host  
795 Microbe, 2010. **7**(3): p. 221-33.
- 796 36. Matreyek, K.A. and A. Engelman, *The requirement for nucleoporin NUP153*  
797 *during human immunodeficiency virus type 1 infection is determined by the*  
798 *viral capsid.* J Virol, 2011. **85**(15): p. 7818-27.
- 799 37. Matreyek, K.A. and A. Engelman, *Viral and cellular requirements for the*  
800 *nuclear entry of retroviral preintegration nucleoprotein complexes.* Viruses,  
801 2013. **5**(10): p. 2483-511.
- 802 38. Matreyek, K.A., et al., *Nucleoporin NUP153 phenylalanine-glycine motifs*  
803 *engage a common binding pocket within the HIV-1 capsid protein to mediate*  
804 *lentiviral infectivity.* PLoS Pathog, 2013. **9**(10): p. e1003693.
- 805 39. Schaller, T., et al., *HIV-1 capsid-cyclophilin interactions determine nuclear*  
806 *import pathway, integration targeting and replication efficiency.* PLoS Pathog,  
807 2011. **7**(12): p. e1002439.
- 808 40. Stultz, R.D., J.J. Cenker, and D. McDonald, *Imaging HIV-1 Genomic DNA from*  
809 *Entry through Productive Infection.* J Virol, 2017. **91**(9).
- 810 41. Yamashita, M. and M. Emerman, *Capsid is a dominant determinant of*  
811 *retrovirus infectivity in nondividing cells.* J Virol, 2004. **78**(11): p. 5670-8.
- 812 42. Burdick, R.C., et al., *Dynamics and regulation of nuclear import and nuclear*  
813 *movements of HIV-1 complexes.* PLoS Pathog, 2017. **13**(8): p. e1006570.

- 814 43. Chen, N.Y., et al., *HIV-1 capsid is involved in post-nuclear entry steps*.  
815 *Retrovirology*, 2016. **13**: p. 28.
- 816 44. Chin, C.R., et al., *Direct Visualization of HIV-1 Replication Intermediates Shows*  
817 *that Capsid and CPSF6 Modulate HIV-1 Intra-nuclear Invasion and Integration*.  
818 *Cell Rep*, 2015. **13**(8): p. 1717-31.
- 819 45. Hulme, A.E., et al., *Complementary Assays Reveal a Low Level of CA Associated*  
820 *with Viral Complexes in the Nuclei of HIV-1-Infected Cells*. *J Virol*, 2015.  
821 **89**(10): p. 5350-61.
- 822 46. Peng, K., et al., *Quantitative microscopy of functional HIV post-entry complexes*  
823 *reveals association of replication with the viral capsid*. *Elife*, 2014. **3**: p.  
824 e04114.
- 825 47. Burdick, R.C., et al., *HIV-1 uncoats in the nucleus near sites of integration*. *Proc*  
826 *Natl Acad Sci U S A*, 2020. **117**(10): p. 5486-5493.
- 827 48. Koh, Y., et al., *Differential effects of human immunodeficiency virus type 1*  
828 *capsid and cellular factors nucleoporin 153 and LEDGF/p75 on the efficiency*  
829 *and specificity of viral DNA integration*. *J Virol*, 2013. **87**(1): p. 648-58.
- 830 49. Ocwieja, K.E., et al., *HIV integration targeting: a pathway involving*  
831 *Transportin-3 and the nuclear pore protein RanBP2*. *PLoS Pathog*, 2011. **7**(3):  
832 p. e1001313.
- 833 50. Serrao, E. and A.N. Engelman, *Sites of retroviral DNA integration: From basic*  
834 *research to clinical applications*. *Crit Rev Biochem Mol Biol*, 2016. **51**(1): p.  
835 26-42.
- 836 51. Sowd, G.A., et al., *A critical role for alternative polyadenylation factor CPSF6 in*  
837 *targeting HIV-1 integration to transcriptionally active chromatin*. *Proc Natl*  
838 *Acad Sci U S A*, 2016. **113**(8): p. E1054-63.
- 839 52. Gao, D., et al., *Cyclic GMP-AMP synthase is an innate immune sensor of HIV and*  
840 *other retroviruses*. *Science*, 2013. **341**(6148): p. 903-6.
- 841 53. Lahaye, X. and N. Manel, *Viral and cellular mechanisms of the innate immune*  
842 *sensing of HIV*. *Curr Opin Virol*, 2015. **11**: p. 55-62.
- 843 54. Lahaye, X., et al., *The capsids of HIV-1 and HIV-2 determine immune detection*  
844 *of the viral cDNA by the innate sensor cGAS in dendritic cells*. *Immunity*, 2013.  
845 **39**(6): p. 1132-42.
- 846 55. Rasaiyaah, J., et al., *HIV-1 evades innate immune recognition through specific*  
847 *cofactor recruitment*. *Nature*, 2013. **503**(7476): p. 402-405.
- 848 56. Towers, G.J. and M. Noursadeghi, *Interactions between HIV-1 and the cell-*  
849 *autonomous innate immune system*. *Cell Host Microbe*, 2014. **16**(1): p. 10-8.
- 850 57. Fitzon, T., et al., *Proline residues in the HIV-1 NH2-terminal capsid domain:*  
851 *structure determinants for proper core assembly and subsequent steps of early*  
852 *replication*. *Virology*, 2000. **268**(2): p. 294-307.
- 853 58. Reicin, A.S., et al., *The role of Gag in human immunodeficiency virus type 1*  
854 *virion morphogenesis and early steps of the viral life cycle*. *J Virol*, 1996.  
855 **70**(12): p. 8645-52.
- 856 59. Tang, S., et al., *Human immunodeficiency virus type 1 N-terminal capsid*  
857 *mutants that exhibit aberrant core morphology and are blocked in initiation of*  
858 *reverse transcription in infected cells*. *J Virol*, 2001. **75**(19): p. 9357-66.

- 859 60. Cosnefroy, O., P.J. Murray, and K.N. Bishop, *HIV-1 capsid uncoating initiates*  
860 *after the first strand transfer of reverse transcription*. *Retrovirology*, 2016.  
861 **13**(1): p. 58.
- 862 61. Rankovic, S., et al., *Reverse Transcription Mechanically Initiates HIV-1 Capsid*  
863 *Disassembly*. *J Virol*, 2017. **91**(12).
- 864 62. Yang, Y., T. Fricke, and F. Diaz-Griffero, *Inhibition of reverse transcriptase*  
865 *activity increases stability of the HIV-1 core*. *J Virol*, 2013. **87**(1): p. 683-7.
- 866 63. Kessel, J.J., et al., *HIV-1 Integrase Binds the Viral RNA Genome and Is Essential*  
867 *during Virion Morphogenesis*. *Cell*, 2016. **166**(5): p. 1257-1268 e12.
- 868 64. Fontana, J., et al., *Distribution and Redistribution of HIV-1 Nucleocapsid*  
869 *Protein in Immature, Mature, and Integrase-Inhibited Virions: a Role for*  
870 *Integrase in Maturation*. *J Virol*, 2015. **89**(19): p. 9765-80.
- 871 65. Jurado, K.A., et al., *Allosteric integrase inhibitor potency is determined through*  
872 *the inhibition of HIV-1 particle maturation*. *Proc Natl Acad Sci U S A*, 2013.  
873 **110**(21): p. 8690-5.
- 874 66. Engelman, A., *In vivo analysis of retroviral integrase structure and function*.  
875 *Adv Virus Res*, 1999. **52**: p. 411-26.
- 876 67. Leavitt, A.D., et al., *Human immunodeficiency virus type 1 integrase mutants*  
877 *retain in vitro integrase activity yet fail to integrate viral DNA efficiently*  
878 *during infection*. *J Virol*, 1996. **70**(2): p. 721-8.
- 879 68. Lu, R., H.Z. Ghory, and A. Engelman, *Genetic analyses of conserved residues in*  
880 *the carboxyl-terminal domain of human immunodeficiency virus type 1*  
881 *integrase*. *J Virol*, 2005. **79**(16): p. 10356-68.
- 882 69. Lu, R., et al., *Class II integrase mutants with changes in putative nuclear*  
883 *localization signals are primarily blocked at a postnuclear entry step of human*  
884 *immunodeficiency virus type 1 replication*. *J Virol*, 2004. **78**(23): p. 12735-46.
- 885 70. Nakamura, T., et al., *Lack of infectivity of HIV-1 integrase zinc finger-like*  
886 *domain mutant with morphologically normal maturation*. *Biochem Biophys*  
887 *Res Commun*, 1997. **239**(3): p. 715-22.
- 888 71. Shin, C.G., et al., *Genetic analysis of the human immunodeficiency virus type 1*  
889 *integrase protein*. *J Virol*, 1994. **68**(3): p. 1633-42.
- 890 72. Wu, X., et al., *Human immunodeficiency virus type 1 integrase protein promotes*  
891 *reverse transcription through specific interactions with the nucleoprotein*  
892 *reverse transcription complex*. *J Virol*, 1999. **73**(3): p. 2126-35.
- 893 73. Ao, Z., et al., *Contribution of the C-terminal tri-lysine regions of human*  
894 *immunodeficiency virus type 1 integrase for efficient reverse transcription and*  
895 *viral DNA nuclear import*. *Retrovirology*, 2005. **2**: p. 62.
- 896 74. Busschots, K., et al., *Identification of the LEDGF/p75 binding site in HIV-1*  
897 *integrase*. *J Mol Biol*, 2007. **365**(5): p. 1480-92.
- 898 75. Engelman, A., et al., *Structure-based mutagenesis of the catalytic domain of*  
899 *human immunodeficiency virus type 1 integrase*. *J Virol*, 1997. **71**(5): p. 3507-  
900 14.
- 901 76. Limon, A., et al., *Nuclear localization of human immunodeficiency virus type 1*  
902 *preintegration complexes (PICs): V165A and R166A are pleiotropic integrase*  
903 *mutants primarily defective for integration, not PIC nuclear import*. *J Virol*,  
904 2002. **76**(21): p. 10598-607.



- 905 77. Lloyd, A.G., et al., *Characterization of HIV-1 integrase N-terminal mutant*  
906 *viruses*. *Virology*, 2007. **360**(1): p. 129-35.
- 907 78. Lu, R., et al., *Lys-34, dispensable for integrase catalysis, is required for*  
908 *preintegration complex function and human immunodeficiency virus type 1*  
909 *replication*. *J Virol*, 2005. **79**(19): p. 12584-91.
- 910 79. Masuda, T., et al., *Genetic analysis of human immunodeficiency virus type 1*  
911 *integrase and the U3 att site: unusual phenotype of mutants in the zinc finger-*  
912 *like domain*. *J Virol*, 1995. **69**(11): p. 6687-96.
- 913 80. Rahman, S., et al., *Structure-based mutagenesis of the integrase-LEDGF/p75*  
914 *interface uncouples a strict correlation between in vitro protein binding and*  
915 *HIV-1 fitness*. *Virology*, 2007. **357**(1): p. 79-90.
- 916 81. Riviere, L., J.L. Darlix, and A. Cimarelli, *Analysis of the viral elements required*  
917 *in the nuclear import of HIV-1 DNA*. *J Virol*, 2010. **84**(2): p. 729-39.
- 918 82. Tsurutani, N., et al., *Identification of critical amino acid residues in human*  
919 *immunodeficiency virus type 1 IN required for efficient proviral DNA formation*  
920 *at steps prior to integration in dividing and nondividing cells*. *J Virol*, 2000.  
921 **74**(10): p. 4795-806.
- 922 83. Wiskerchen, M. and M.A. Muesing, *Human immunodeficiency virus type 1*  
923 *integrase: effects of mutations on viral ability to integrate, direct viral gene*  
924 *expression from unintegrated viral DNA templates, and sustain viral*  
925 *propagation in primary cells*. *J Virol*, 1995. **69**(1): p. 376-86.
- 926 84. Zhu, K., C. Dobard, and S.A. Chow, *Requirement for integrase during reverse*  
927 *transcription of human immunodeficiency virus type 1 and the effect of cysteine*  
928 *mutations of integrase on its interactions with reverse transcriptase*. *J Virol*,  
929 2004. **78**(10): p. 5045-55.
- 930 85. De Houwer, S., et al., *The HIV-1 integrase mutant R263A/K264A is 2-fold*  
931 *defective for TRN-SR2 binding and viral nuclear import*. *J Biol Chem*, 2014.  
932 **289**(36): p. 25351-61.
- 933 86. Johnson, B.C., et al., *A homology model of HIV-1 integrase and analysis of*  
934 *mutations designed to test the model*. *J Mol Biol*, 2013. **425**(12): p. 2133-46.
- 935 87. Mohammed, K.D., M.B. Topper, and M.A. Muesing, *Sequential deletion of the*  
936 *integrase (Gag-Pol) carboxyl terminus reveals distinct phenotypic classes of*  
937 *defective HIV-1*. *J Virol*, 2011. **85**(10): p. 4654-66.
- 938 88. Shehu-Xhilaga, M., et al., *The conformation of the mature dimeric human*  
939 *immunodeficiency virus type 1 RNA genome requires packaging of pol protein*. *J*  
940 *Virol*, 2002. **76**(9): p. 4331-40.
- 941 89. Engelman, A., et al., *Multiple effects of mutations in human immunodeficiency*  
942 *virus type 1 integrase on viral replication*. *J Virol*, 1995. **69**(5): p. 2729-36.
- 943 90. Madison, M.K., et al., *Allosteric HIV-1 Integrase Inhibitors Lead to Premature*  
944 *Degradation of the Viral RNA Genome and Integrase in Target Cells*. *J Virol*,  
945 2017. **91**(17).
- 946 91. Wang, W., et al., *Inhibition of HIV-1 Maturation via Small-Molecule Targeting*  
947 *of the Amino-Terminal Domain in the Viral Capsid Protein*. *J Virol*, 2017. **91**(9).
- 948 92. Da Silva Santos, C., K. Tartour, and A. Cimarelli, *A Novel Entry/Uncoating*  
949 *Assay Reveals the Presence of at Least Two Species of Viral Capsids During*  
950 *Synchronized HIV-1 Infection*. *PLoS Pathog*, 2016. **12**(9): p. e1005897.

- 951 93. Aiken, C., *Cell-free assays for HIV-1 uncoating*. Methods Mol Biol, 2009. **485**: p.  
952 41-53.
- 953 94. Yang, Y., J. Luban, and F. Diaz-Griffero, *The fate of HIV-1 capsid: a biochemical*  
954 *assay for HIV-1 uncoating*. Methods Mol Biol, 2014. **1087**: p. 29-36.
- 955 95. Kutluay, S.B., D. Perez-Caballero, and P.D. Bieniasz, *Fates of retroviral core*  
956 *components during unrestricted and TRIM5-restricted infection*. PLoS Pathog,  
957 2013. **9**(3): p. e1003214.
- 958 96. Goudreau, N., et al., *Novel inhibitor binding site discovery on HIV-1 capsid N-*  
959 *terminal domain by NMR and X-ray crystallography*. ACS Chem Biol, 2013.  
960 **8**(5): p. 1074-82.
- 961 97. Lemke, C.T., et al., *A novel inhibitor-binding site on the HIV-1 capsid N-terminal*  
962 *domain leads to improved crystallization via compound-mediated*  
963 *dimerization*. Acta Crystallogr D Biol Crystallogr, 2013. **69**(Pt 6): p. 1115-23.
- 964 98. Kutluay, S.B. and P.D. Bieniasz, *Analysis of HIV-1 Gag-RNA Interactions in Cells*  
965 *and Virions by CLIP-seq*. Methods Mol Biol, 2016. **1354**: p. 119-31.
- 966 99. Kutluay, S.B., et al., *Global changes in the RNA binding specificity of HIV-1 gag*  
967 *regulate virion genesis*. Cell, 2014. **159**(5): p. 1096-109.
- 968 100. Douglas, C.C., et al., *Investigation of N-terminal domain charged residues on*  
969 *the assembly and stability of HIV-1 CA*. Biochemistry, 2004. **43**(32): p. 10435-  
970 41.
- 971 101. Yang, R., et al., *Second-site suppressors of HIV-1 capsid mutations: restoration*  
972 *of intracellular activities without correction of intrinsic capsid stability defects*.  
973 Retrovirology, 2012. **9**: p. 30.
- 974 102. Welker, R., et al., *Biochemical and structural analysis of isolated mature cores*  
975 *of human immunodeficiency virus type 1*. J Virol, 2000. **74**(3): p. 1168-77.
- 976 103. Shi, J., et al., *Compensatory substitutions in the HIV-1 capsid reduce the fitness*  
977 *cost associated with resistance to a capsid-targeting small-molecule inhibitor*. J  
978 Virol, 2015. **89**(1): p. 208-19.
- 979 104. Siddiqui, M.A., et al., *A Novel Phenotype Links HIV-1 Capsid Stability to cGAS-*  
980 *Mediated DNA Sensing*. J Virol, 2019. **93**(16).
- 981 105. Fricke, T., et al., *Human cytosolic extracts stabilize the HIV-1 core*. J Virol,  
982 2013. **87**(19): p. 10587-97.
- 983 106. Ganser-Pornillos, B.K., A. Cheng, and M. Yeager, *Structure of full-length HIV-1*  
984 *CA: a model for the mature capsid lattice*. Cell, 2007. **131**(1): p. 70-9.
- 985 107. Shi, J. and C. Aiken, *Saturation of TRIM5 alpha-mediated restriction of HIV-1*  
986 *infection depends on the stability of the incoming viral capsid*. Virology, 2006.  
987 **350**(2): p. 493-500.
- 988 108. Mulder, L.C. and M.A. Muesing, *Degradation of HIV-1 integrase by the N-end*  
989 *rule pathway*. J Biol Chem, 2000. **275**(38): p. 29749-53.
- 990 109. Ali, H., et al., *Cellular TRIM33 restrains HIV-1 infection by targeting viral*  
991 *integrase for proteasomal degradation*. Nat Commun, 2019. **10**(1): p. 926.
- 992 110. Llano, M., et al., *Lens epithelium-derived growth factor/p75 prevents*  
993 *proteasomal degradation of HIV-1 integrase*. J Biol Chem, 2004. **279**(53): p.  
994 55570-7.

- 995 111. Zheng, Y., et al., *Host protein Ku70 binds and protects HIV-1 integrase from*  
996 *proteasomal degradation and is required for HIV replication.* J Biol Chem,  
997 2011. **286**(20): p. 17722-35.
- 998 112. Devroe, E., A. Engelman, and P.A. Silver, *Intracellular transport of human*  
999 *immunodeficiency virus type 1 integrase.* J Cell Sci, 2003. **116**(Pt 21): p. 4401-  
1000 8.
- 1001 113. Francis, A.C., et al., *Second generation imaging of nuclear/cytoplasmic HIV-1*  
1002 *complexes.* AIDS Res Hum Retroviruses, 2014. **30**(7): p. 717-26.
- 1003 114. Maldarelli, F., M.A. Martin, and K. Strebel, *Identification of*  
1004 *posttranscriptionally active inhibitory sequences in human immunodeficiency*  
1005 *virus type 1 RNA: novel level of gene regulation.* J Virol, 1991. **65**(11): p. 5732-  
1006 43.
- 1007 115. Schwartz, S., et al., *Mutational inactivation of an inhibitory sequence in human*  
1008 *immunodeficiency virus type 1 results in Rev-independent gag expression.* J  
1009 Virol, 1992. **66**(12): p. 7176-82.
- 1010 116. Schwartz, S., B.K. Felber, and G.N. Pavlakis, *Distinct RNA sequences in the gag*  
1011 *region of human immunodeficiency virus type 1 decrease RNA stability and*  
1012 *inhibit expression in the absence of Rev protein.* J Virol, 1992. **66**(1): p. 150-9.
- 1013 117. Wu, X. and G. Brewer, *The regulation of mRNA stability in mammalian cells:*  
1014 *2.0.* Gene, 2012. **500**(1): p. 10-21.
- 1015 118. Gorelick, R.J., et al., *Characterization of the block in replication of nucleocapsid*  
1016 *protein zinc finger mutants from moloney murine leukemia virus.* J Virol, 1999.  
1017 **73**(10): p. 8185-95.
- 1018 119. Miyazaki, Y., et al., *An RNA structural switch regulates diploid genome*  
1019 *packaging by Moloney murine leukemia virus.* J Mol Biol, 2010. **396**(1): p. 141-  
1020 52.
- 1021 120. Sakuragi, J., T. Shioda, and A.T. Panganiban, *Duplication of the primary*  
1022 *encapsidation and dimer linkage region of human immunodeficiency virus type*  
1023 *1 RNA results in the appearance of monomeric RNA in virions.* J Virol, 2001.  
1024 **75**(6): p. 2557-65.
- 1025 121. Tsang, J., et al., *HIV-1 infection of macrophages is dependent on evasion of*  
1026 *innate immune cellular activation.* AIDS, 2009. **23**(17): p. 2255-63.
- 1027 122. Yan, N., et al., *The cytosolic exonuclease TREX1 inhibits the innate immune*  
1028 *response to human immunodeficiency virus type 1.* Nat Immunol, 2010.  
1029 **11**(11): p. 1005-13.
- 1030 123. Altfeld, M. and M. Gale, Jr., *Innate immunity against HIV-1 infection.* Nat  
1031 Immunol, 2015. **16**(6): p. 554-62.
- 1032 124. Jonsson, K.L., et al., *IFI16 is required for DNA sensing in human macrophages*  
1033 *by promoting production and function of cGAMP.* Nat Commun, 2017. **8**: p.  
1034 14391.
- 1035 125. Yoh, S.M., et al., *PQBP1 Is a Proximal Sensor of the cGAS-Dependent Innate*  
1036 *Response to HIV-1.* Cell, 2015. **161**(6): p. 1293-1305.
- 1037 126. Blair, W.S., et al., *HIV capsid is a tractable target for small molecule therapeutic*  
1038 *intervention.* PLoS Pathog, 2010. **6**(12): p. e1001220.
- 1039 127. Sticht, J., et al., *A peptide inhibitor of HIV-1 assembly in vitro.* Nat Struct Mol  
1040 Biol, 2005. **12**(8): p. 671-7.

- 1041 128. Tang, C., et al., *Antiviral inhibition of the HIV-1 capsid protein*. J Mol Biol, 2003.  
1042 **327**(5): p. 1013-20.
- 1043 129. Yant, S.R., et al., *A highly potent long-acting small-molecule HIV-1 capsid*  
1044 *inhibitor with efficacy in a humanized mouse model*. Nat Med, 2019. **25**(9): p.  
1045 1377-1384.
- 1046 130. Shi, J., et al., *Small-molecule inhibition of human immunodeficiency virus type 1*  
1047 *infection by virus capsid destabilization*. J Virol, 2011. **85**(1): p. 542-9.
- 1048 131. Lamorte, L., et al., *Discovery of novel small-molecule HIV-1 replication*  
1049 *inhibitors that stabilize capsid complexes*. Antimicrob Agents Chemother,  
1050 2013. **57**(10): p. 4622-31.
- 1051 132. Thenin-Houssier, S., et al., *Ebselen, a Small-Molecule Capsid Inhibitor of HIV-1*  
1052 *Replication*. Antimicrob Agents Chemother, 2016. **60**(4): p. 2195-208.
- 1053 133. Kortagere, S., et al., *Inhibiting early-stage events in HIV-1 replication by small-*  
1054 *molecule targeting of the HIV-1 capsid*. J Virol, 2012. **86**(16): p. 8472-81.
- 1055 134. Bhattacharya, A., et al., *Structural basis of HIV-1 capsid recognition by PF74*  
1056 *and CPSF6*. Proc Natl Acad Sci U S A, 2014. **111**(52): p. 18625-30.
- 1057 135. Price, A.J., et al., *Host cofactors and pharmacologic ligands share an essential*  
1058 *interface in HIV-1 capsid that is lost upon disassembly*. PLoS Pathog, 2014.  
1059 **10**(10): p. e1004459.
- 1060 136. Fricke, T., et al., *BI-2 destabilizes HIV-1 cores during infection and Prevents*  
1061 *Binding of CPSF6 to the HIV-1 Capsid*. Retrovirology, 2014. **11**: p. 120.
- 1062 137. Rihn, S.J., et al., *Extreme genetic fragility of the HIV-1 capsid*. PLoS Pathog,  
1063 2013. **9**(6): p. e1003461.
- 1064 138. Zennou, V., et al., *APOBEC3G incorporation into human immunodeficiency*  
1065 *virus type 1 particles*. J Virol, 2004. **78**(21): p. 12058-61.
- 1066 139. Cowan, S., et al., *Cellular inhibitors with Fv1-like activity restrict human and*  
1067 *simian immunodeficiency virus tropism*. Proc Natl Acad Sci U S A, 2002.  
1068 **99**(18): p. 11914-9.
- 1069 140. Hatzioannou, T., et al., *Restriction of multiple divergent retroviruses by Lv1*  
1070 *and Ref1*. EMBO J, 2003. **22**(3): p. 385-94.
- 1071 141. Bouyac-Bertoia, M., et al., *HIV-1 infection requires a functional integrase NLS*.  
1072 Mol Cell, 2001. **7**(5): p. 1025-35.
- 1073 142. Pizzato, M., et al., *A one-step SYBR Green I-based product-enhanced reverse*  
1074 *transcriptase assay for the quantitation of retroviruses in cell culture*  
1075 *supernatants*. J Virol Methods, 2009. **156**(1-2): p. 1-7.
- 1076 143. Yoo, S., et al., *Molecular recognition in the HIV-1 capsid/cyclophilin A complex*.  
1077 J Mol Biol, 1997. **269**(5): p. 780-95.
- 1078 144. Gres, A.T., et al., *STRUCTURAL VIROLOGY. X-ray crystal structures of native*  
1079 *HIV-1 capsid protein reveal conformational variability*. Science, 2015.  
1080 **349**(6243): p. 99-103.  
1081

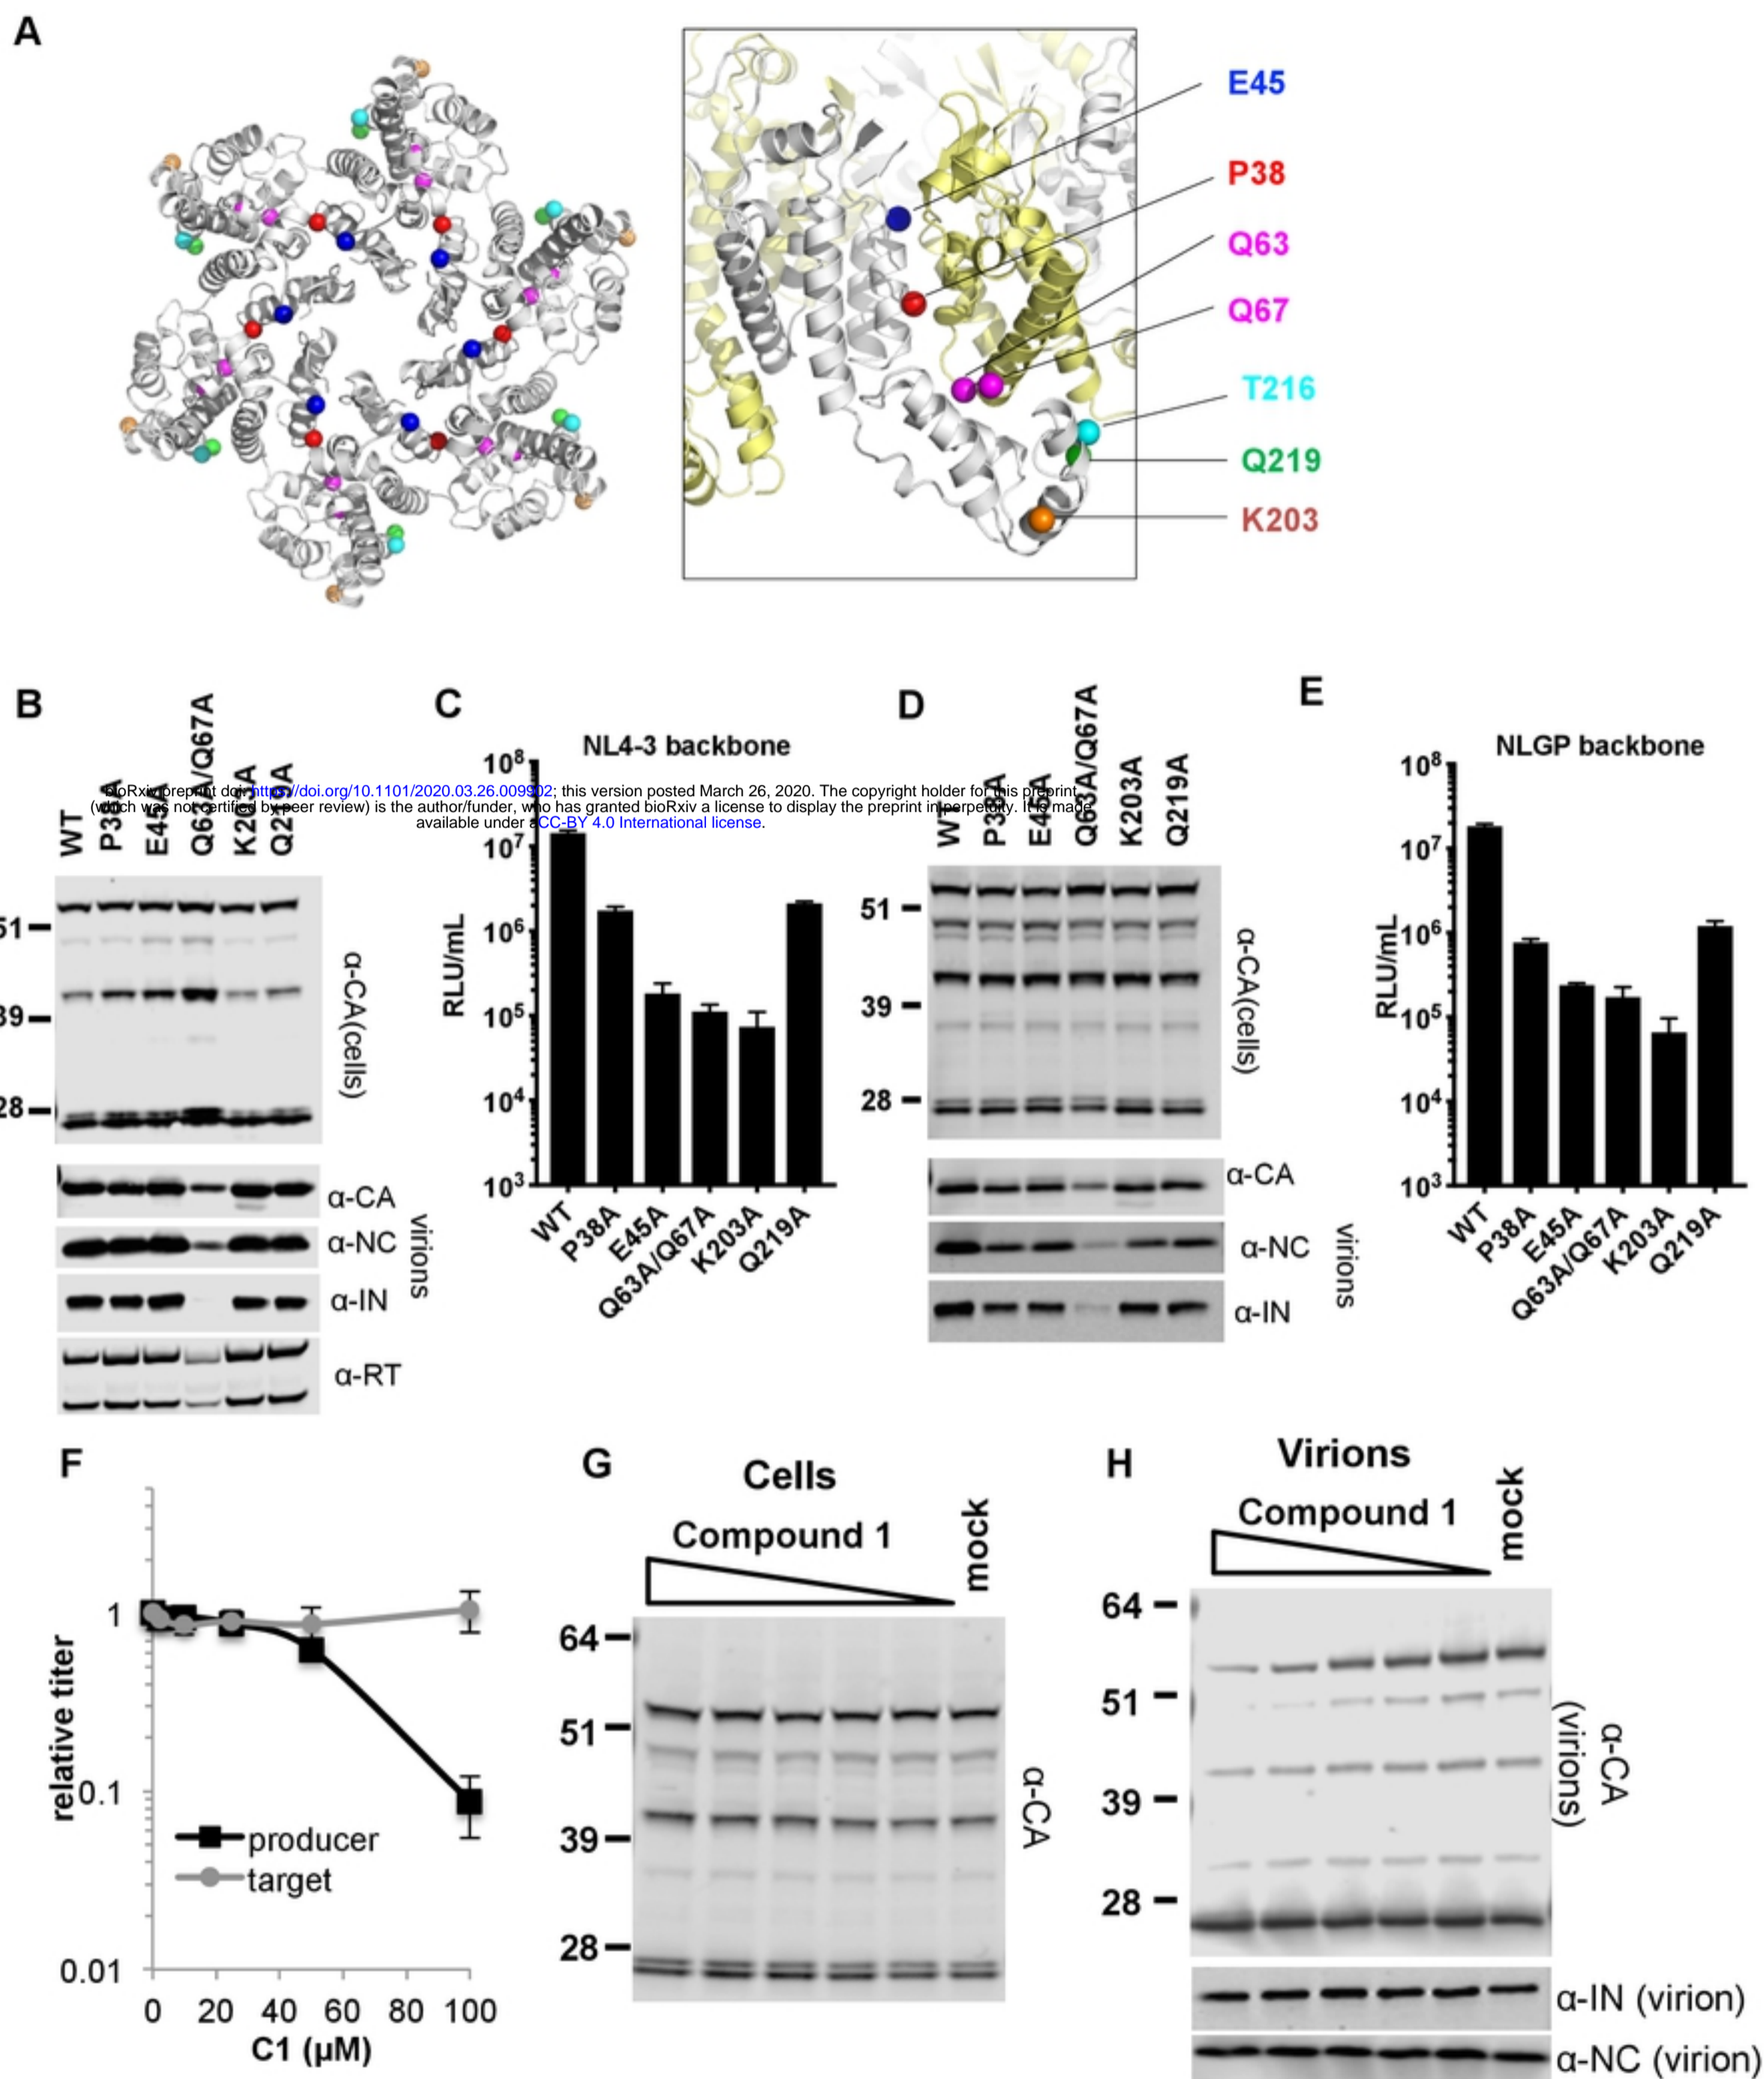

**Figure 1**

**A**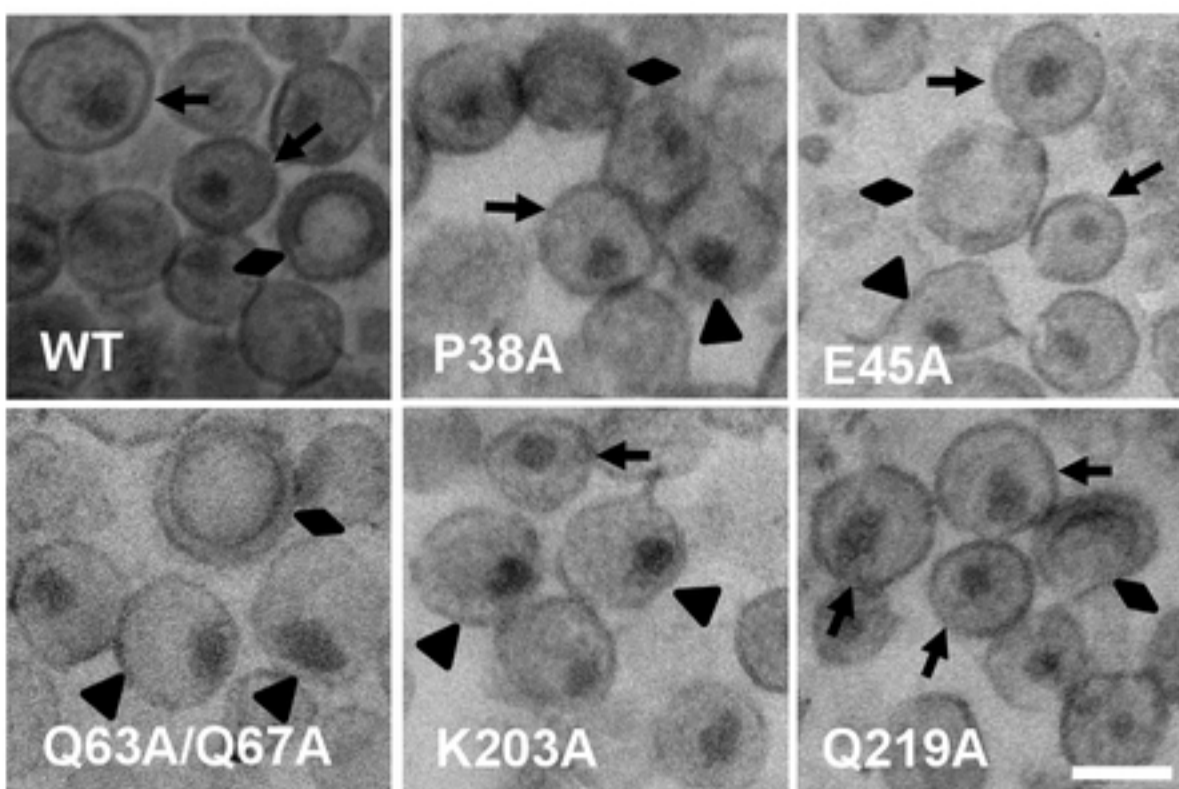**B**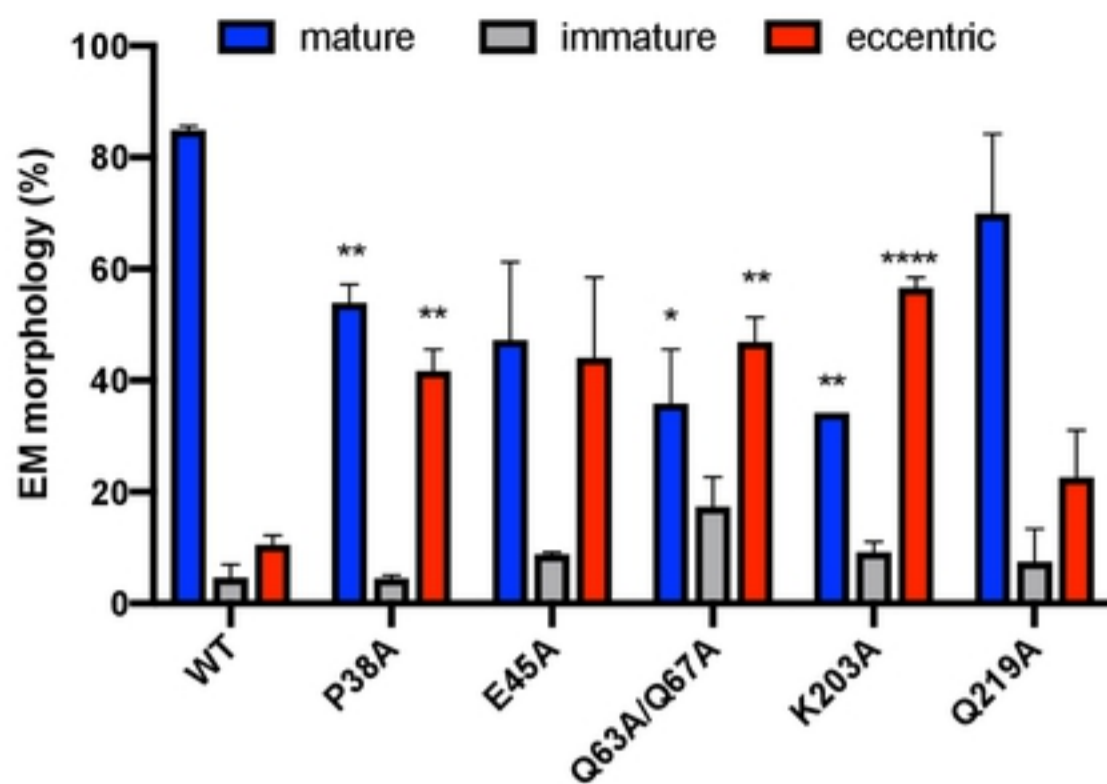

bioRxiv preprint doi: <https://doi.org/10.1101/2020.03.26.009902>; this version posted March 26, 2020. The copyright holder for this preprint (which was not certified by peer review) is the author/funder, who has granted bioRxiv a license to display the preprint in perpetuity. It is made available under aCC-BY 4.0 International license.

**C**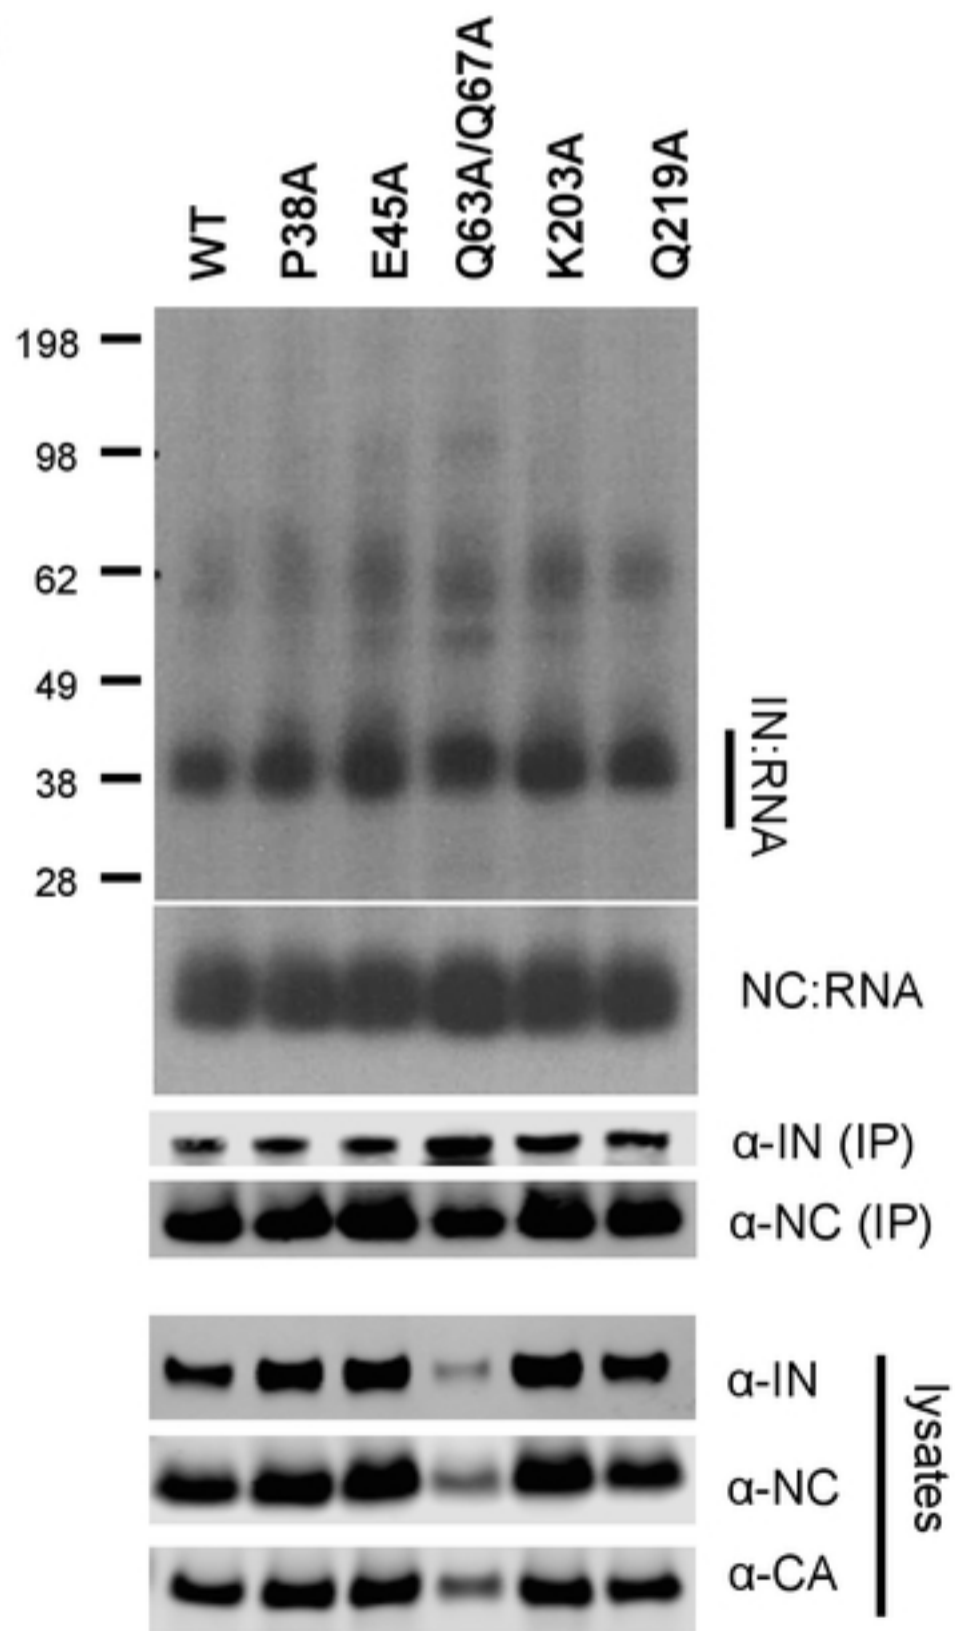**D**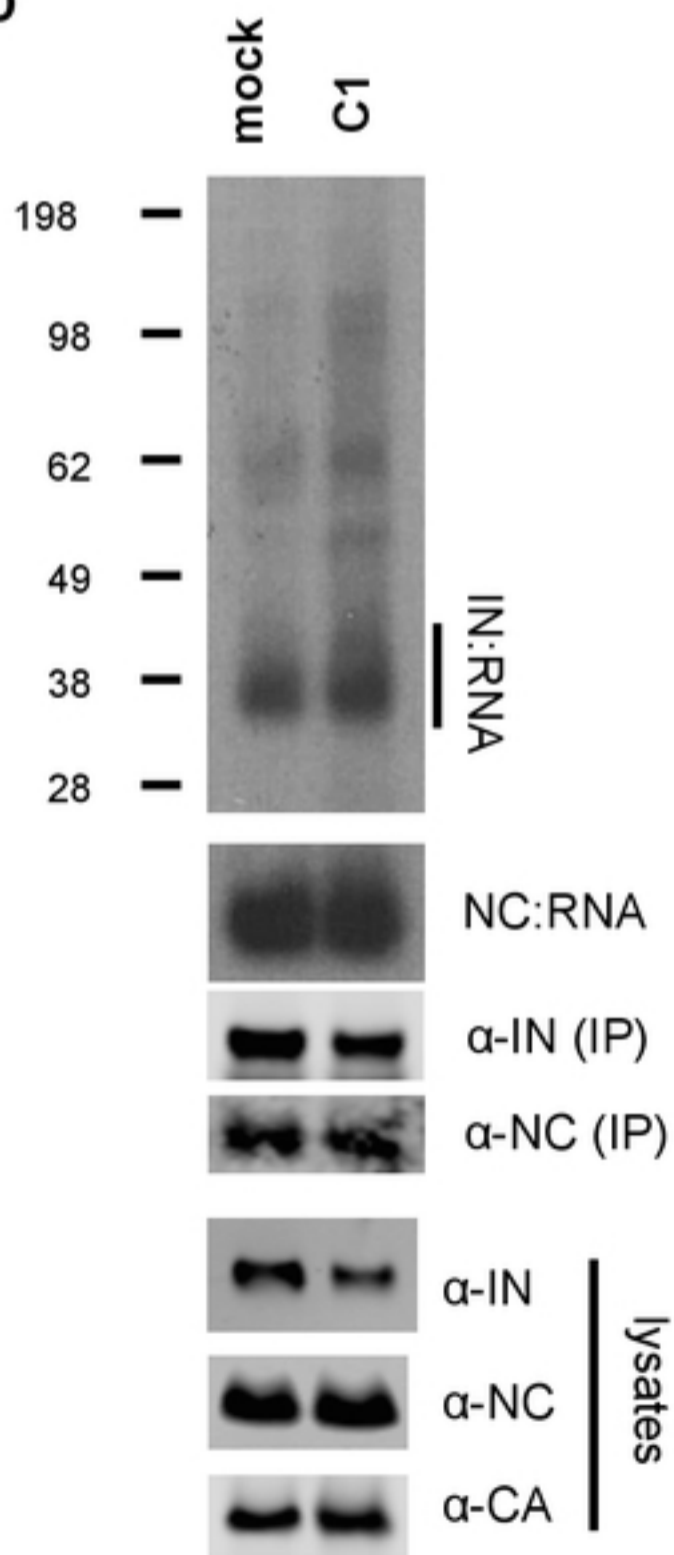

**Figure 2**

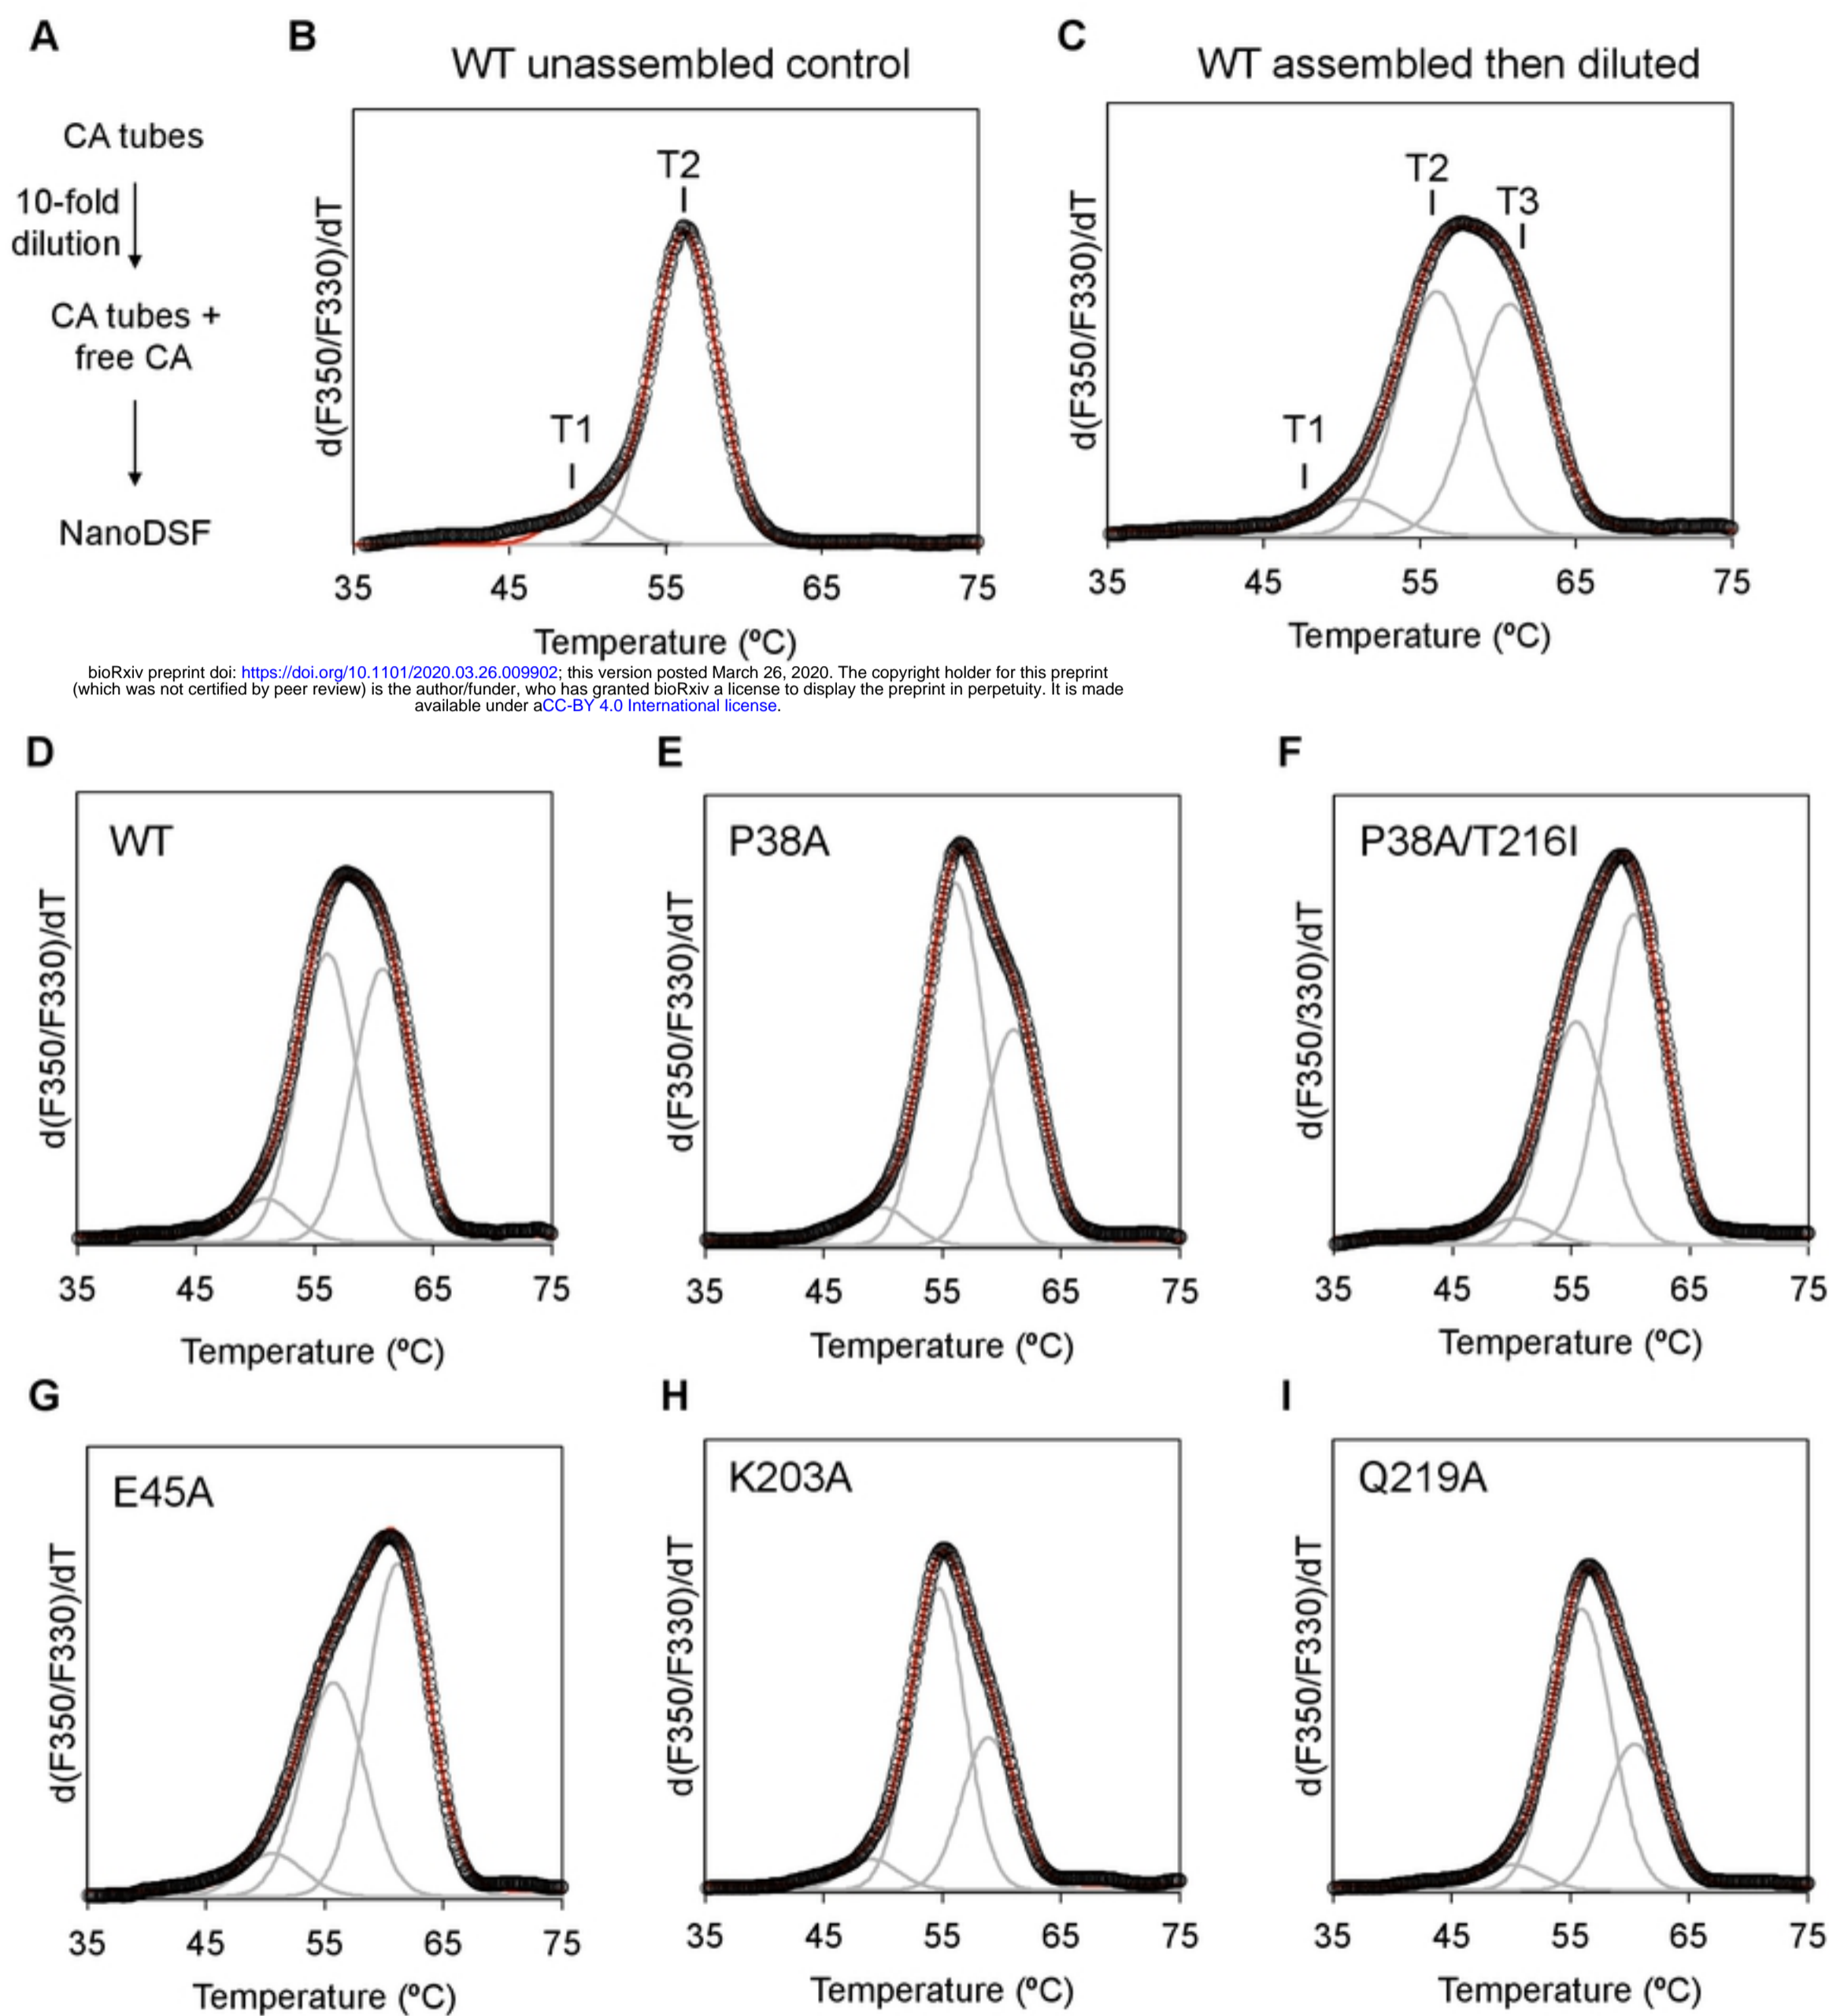

**Figure 3**

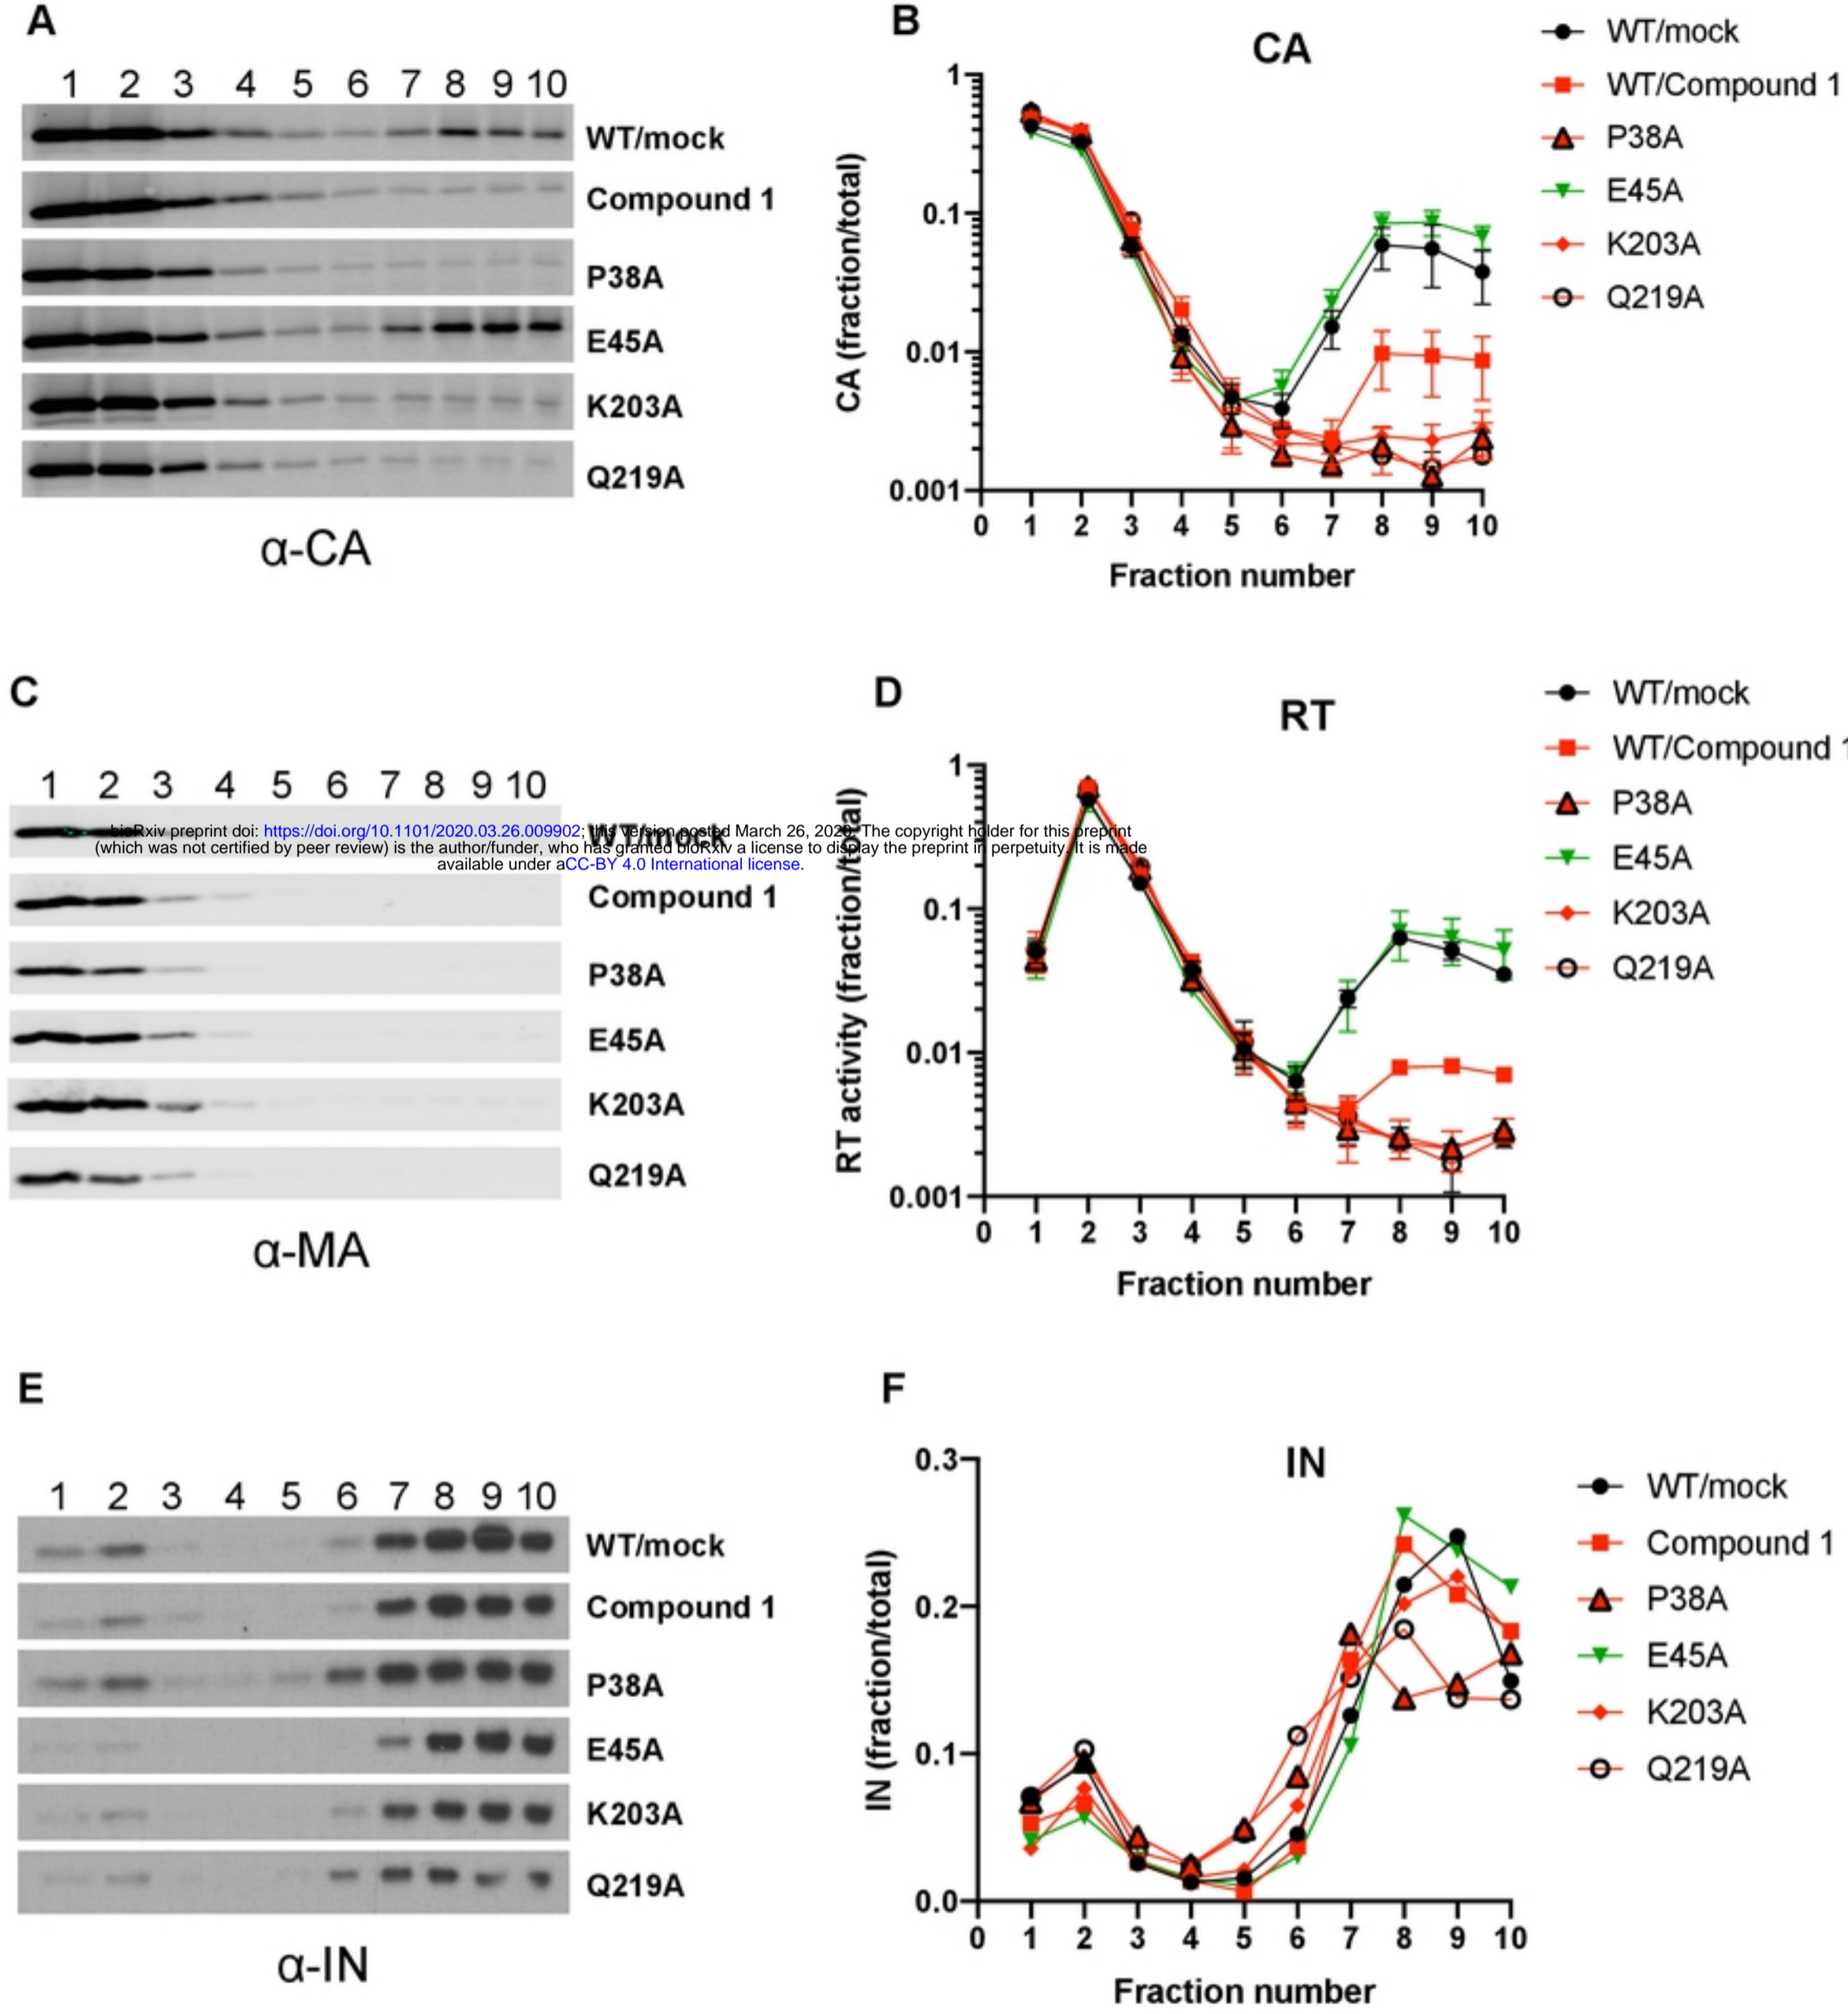

**Figure 4**



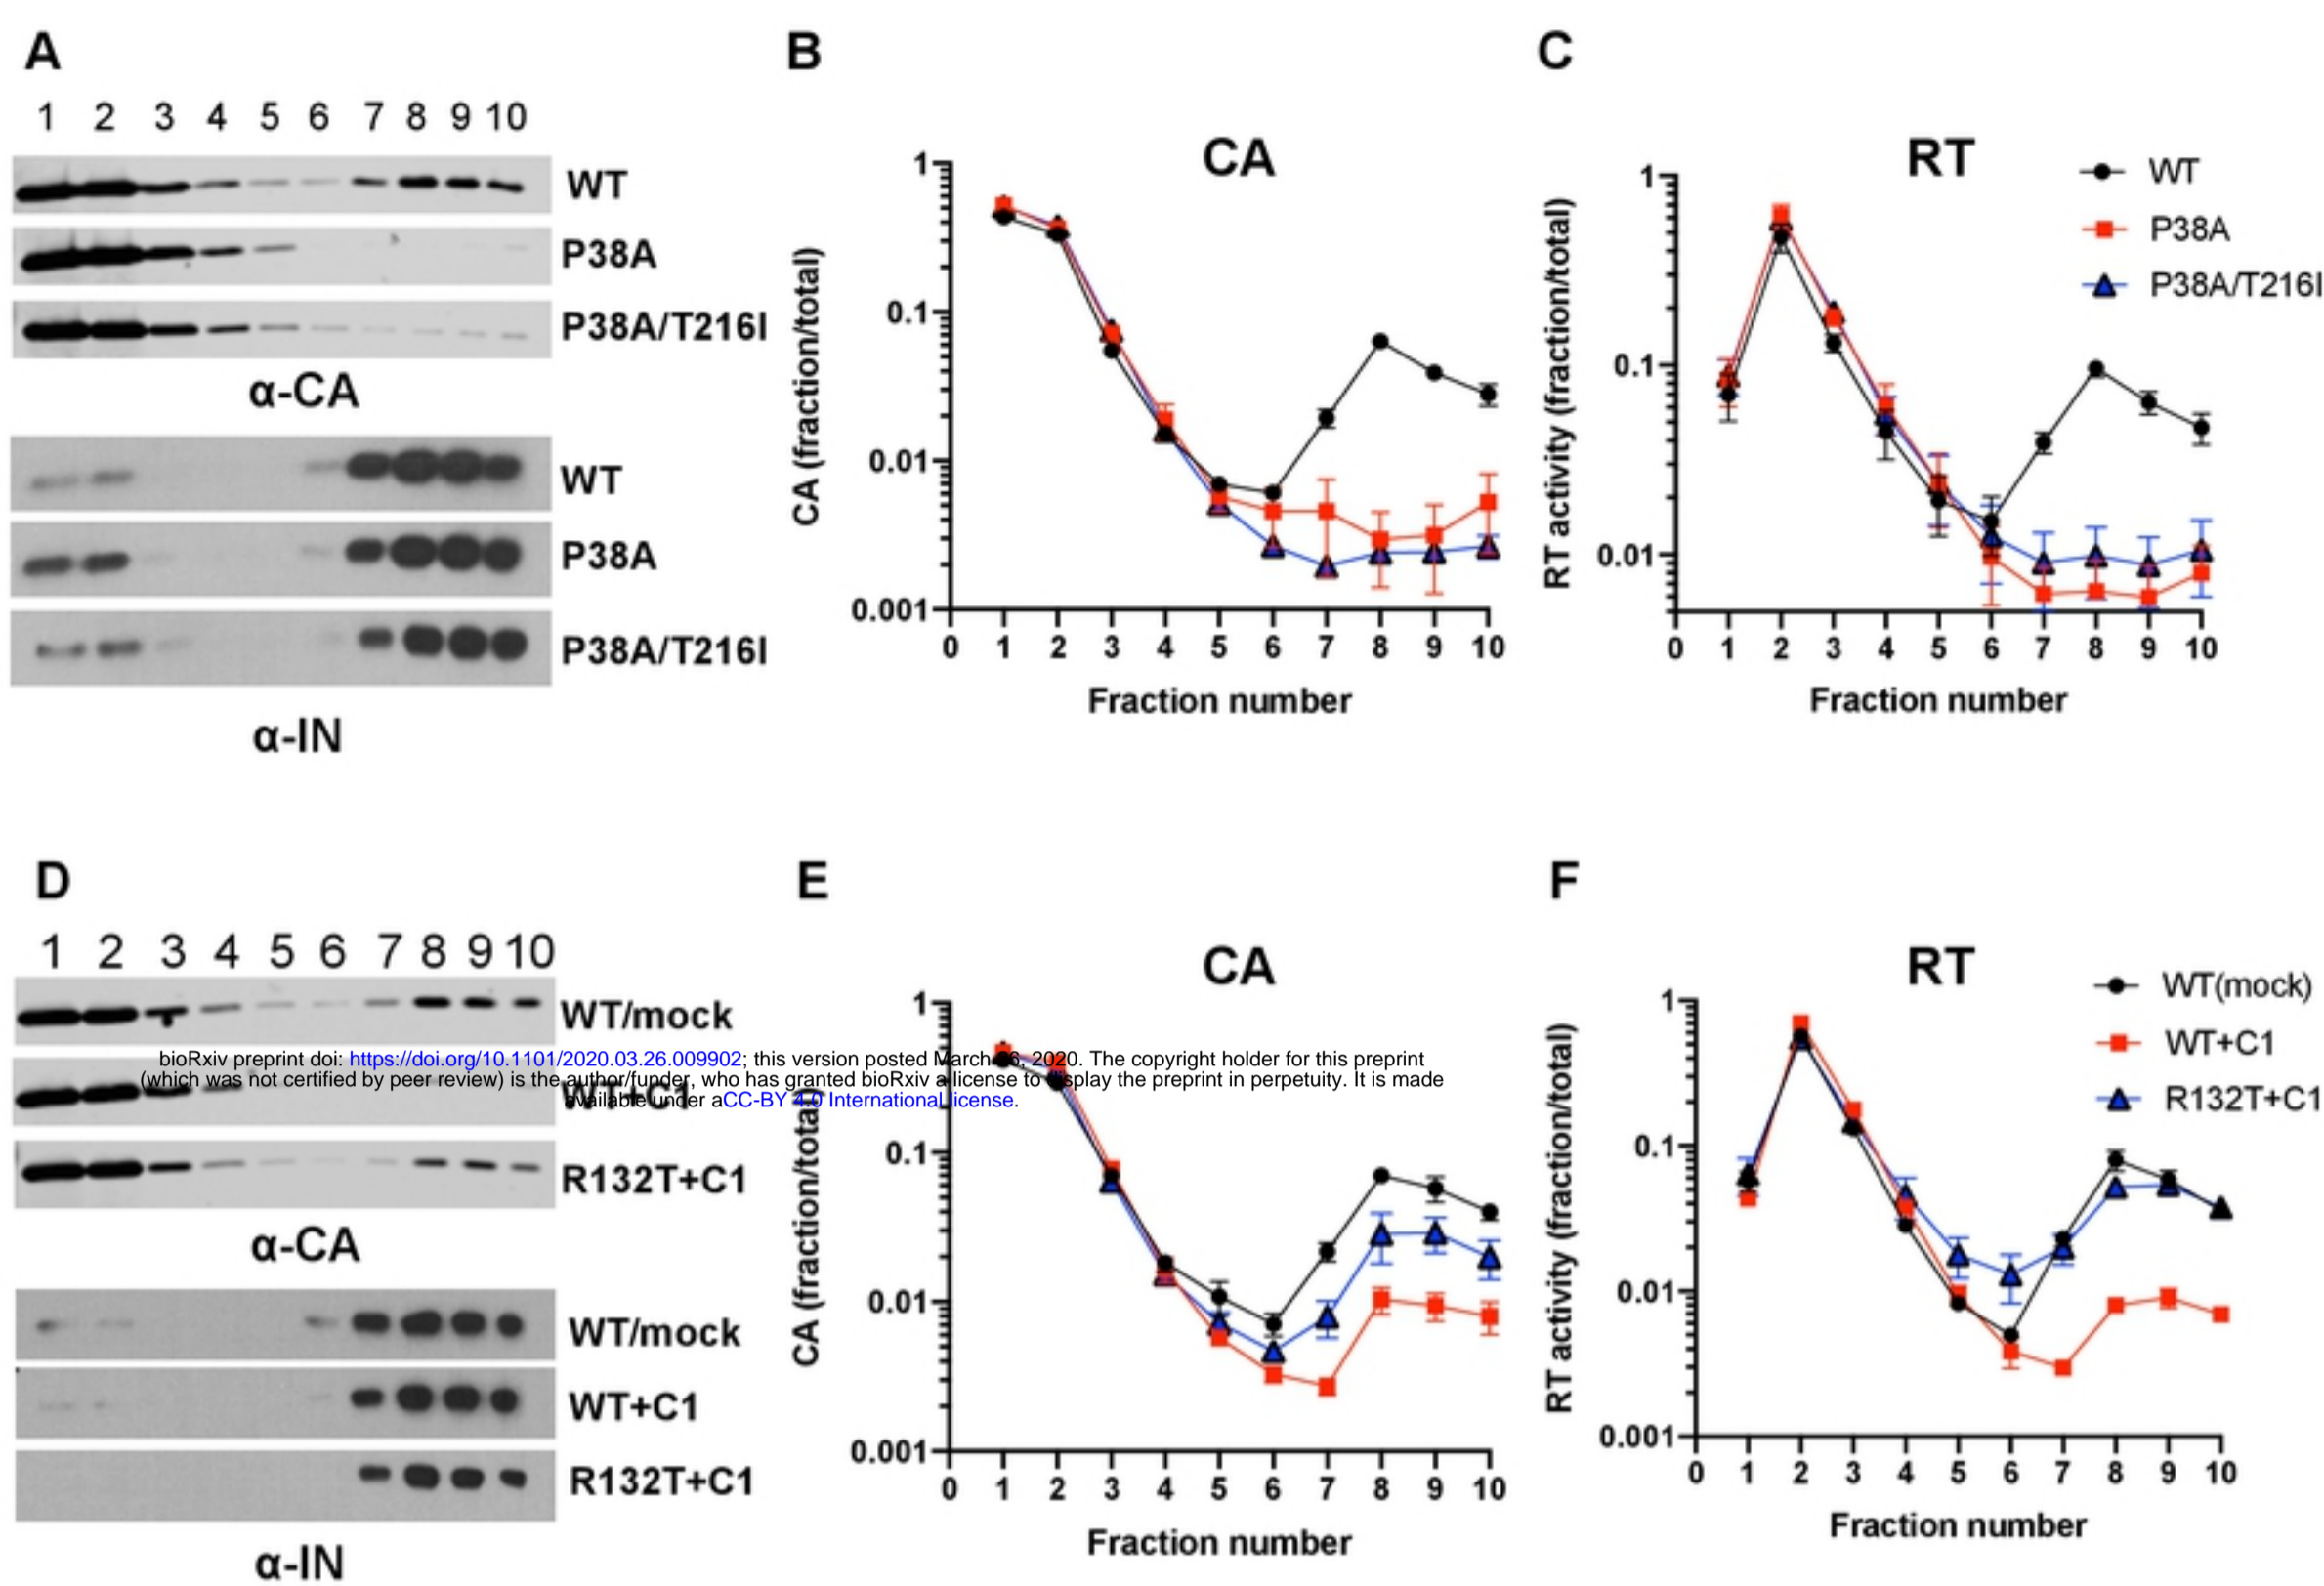

**Figure 5**

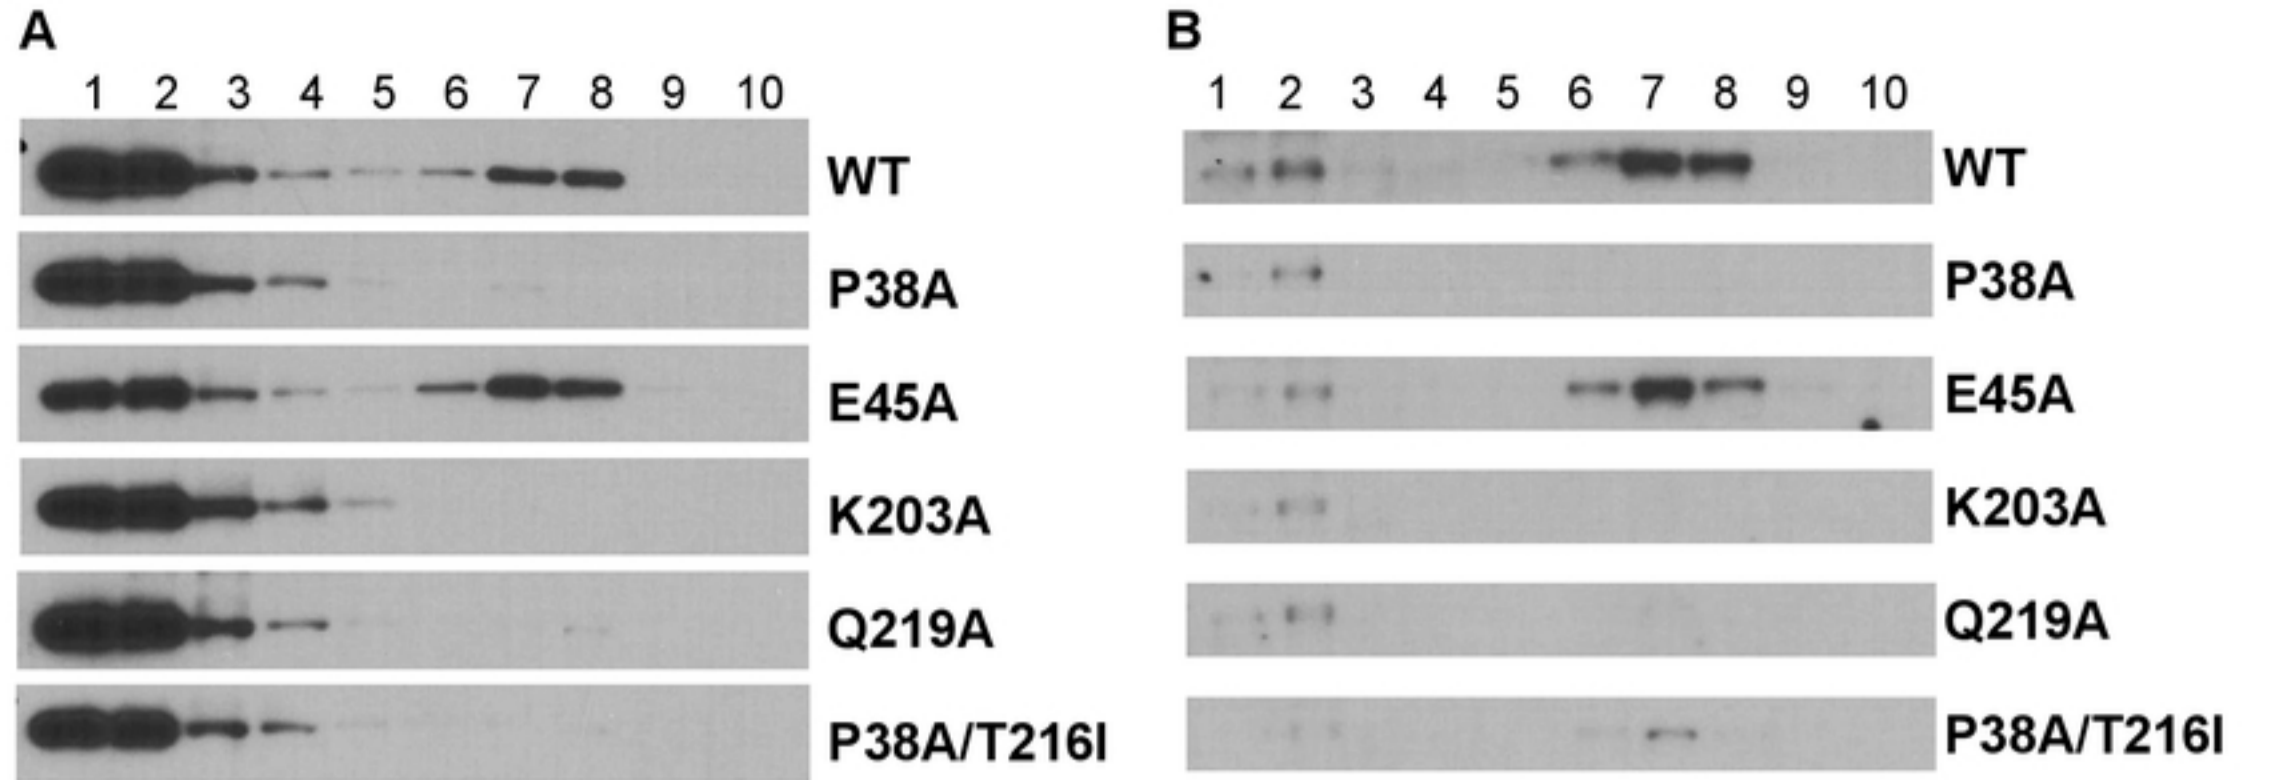

$\alpha$ -CA

$\alpha$ -IN

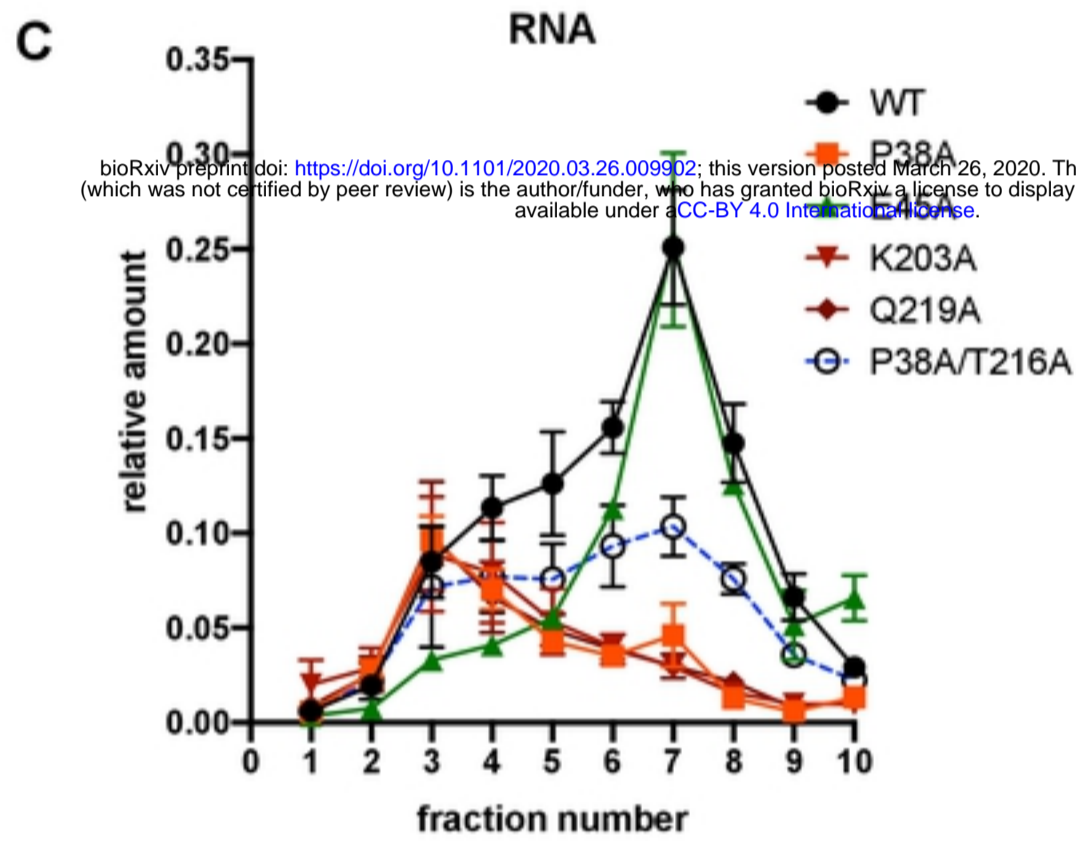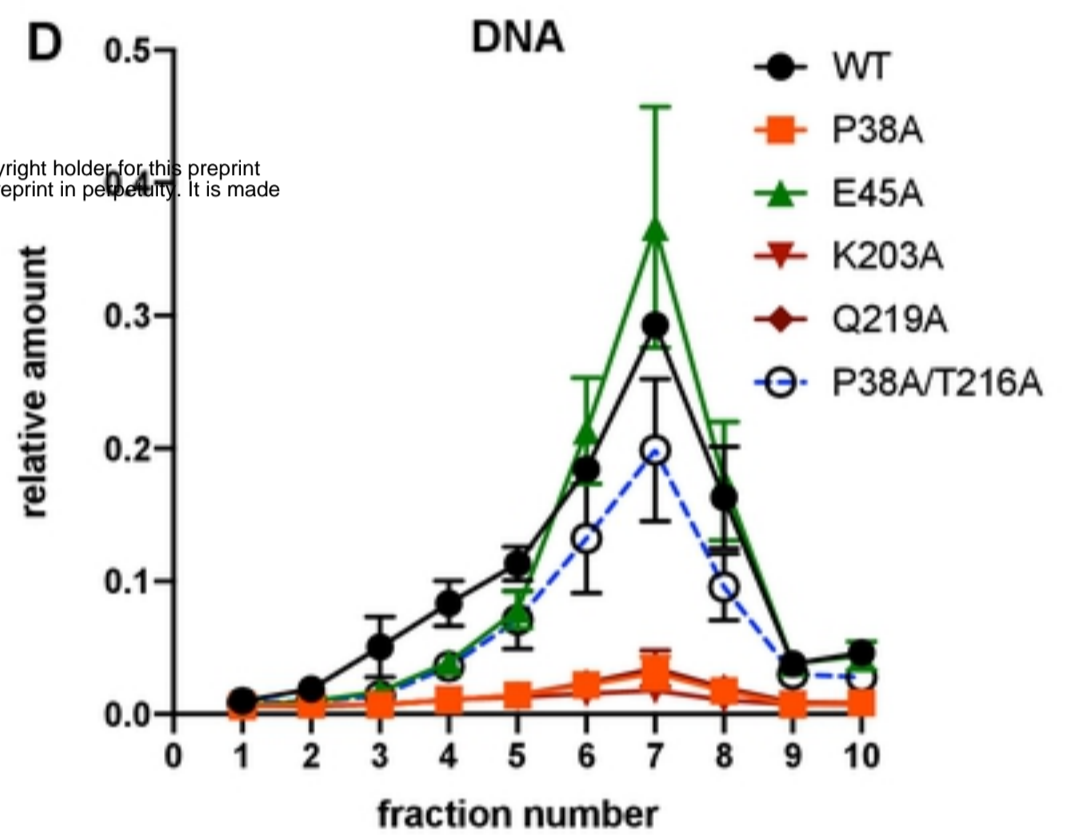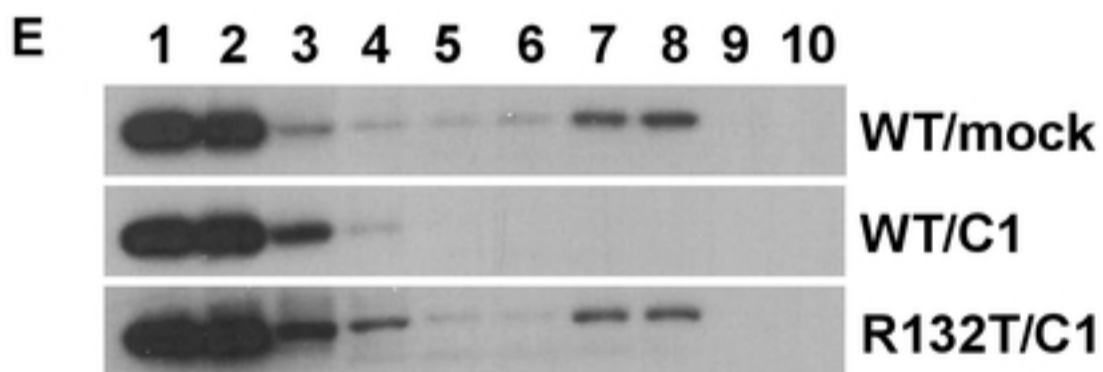

$\alpha$ -CA

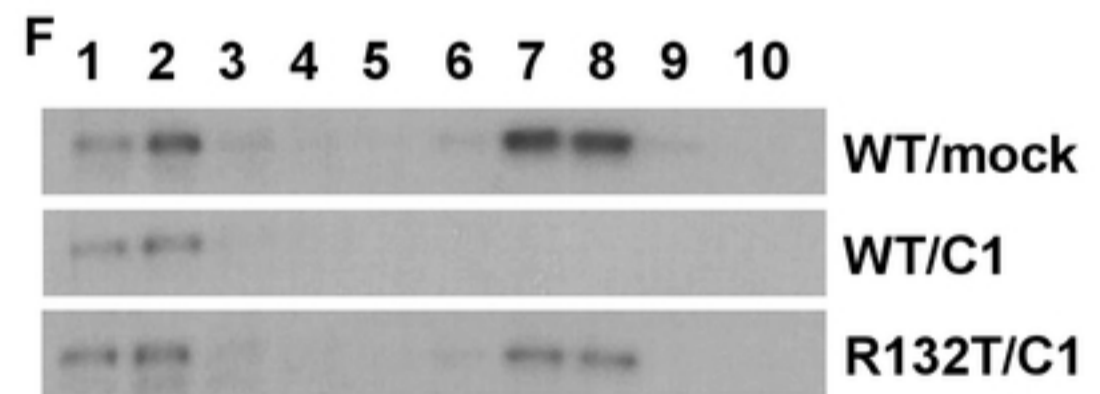

$\alpha$ -IN

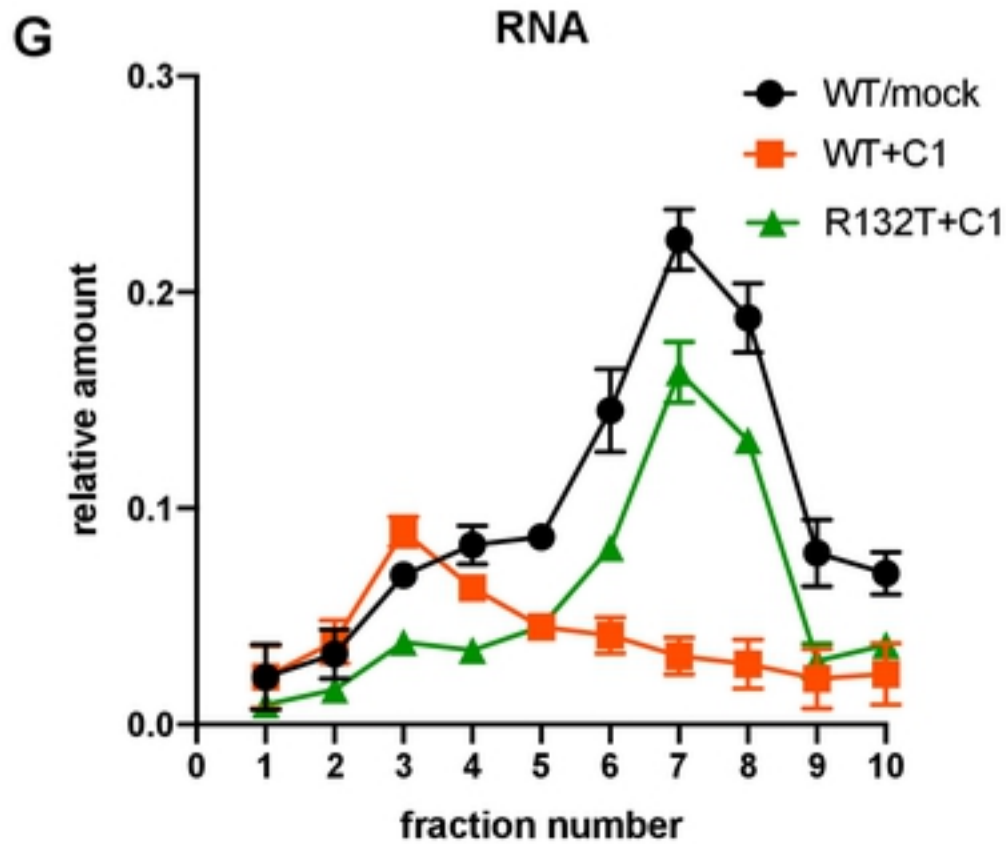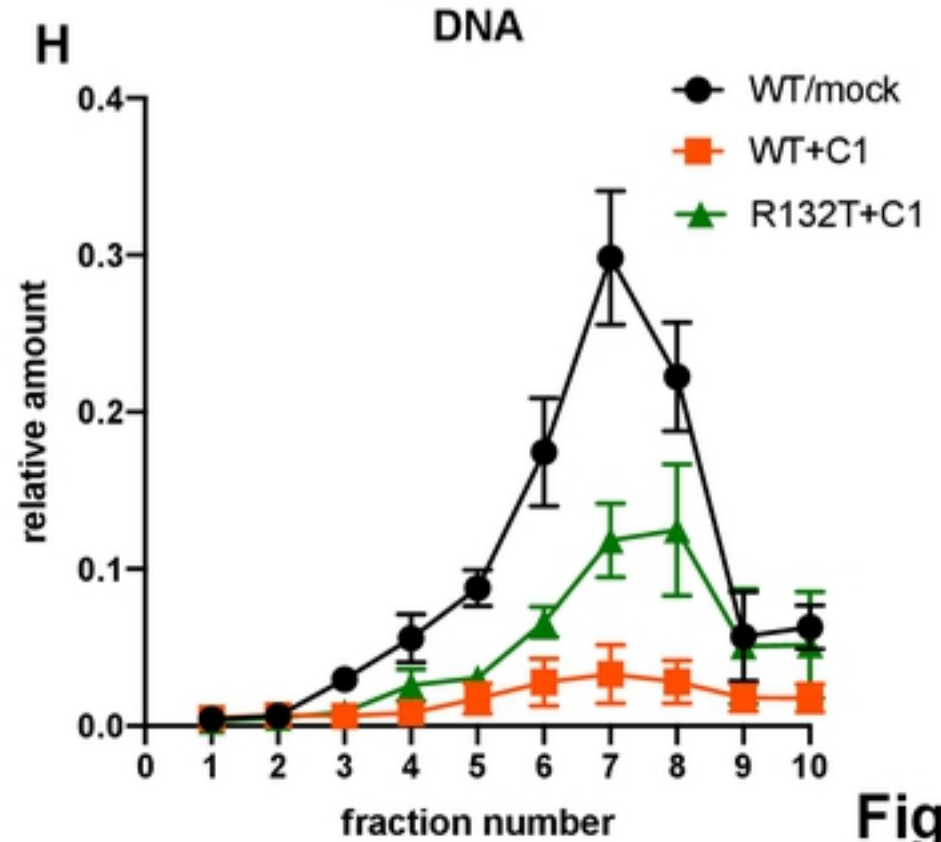

Figure 6

A

(-) NH<sub>4</sub>Cl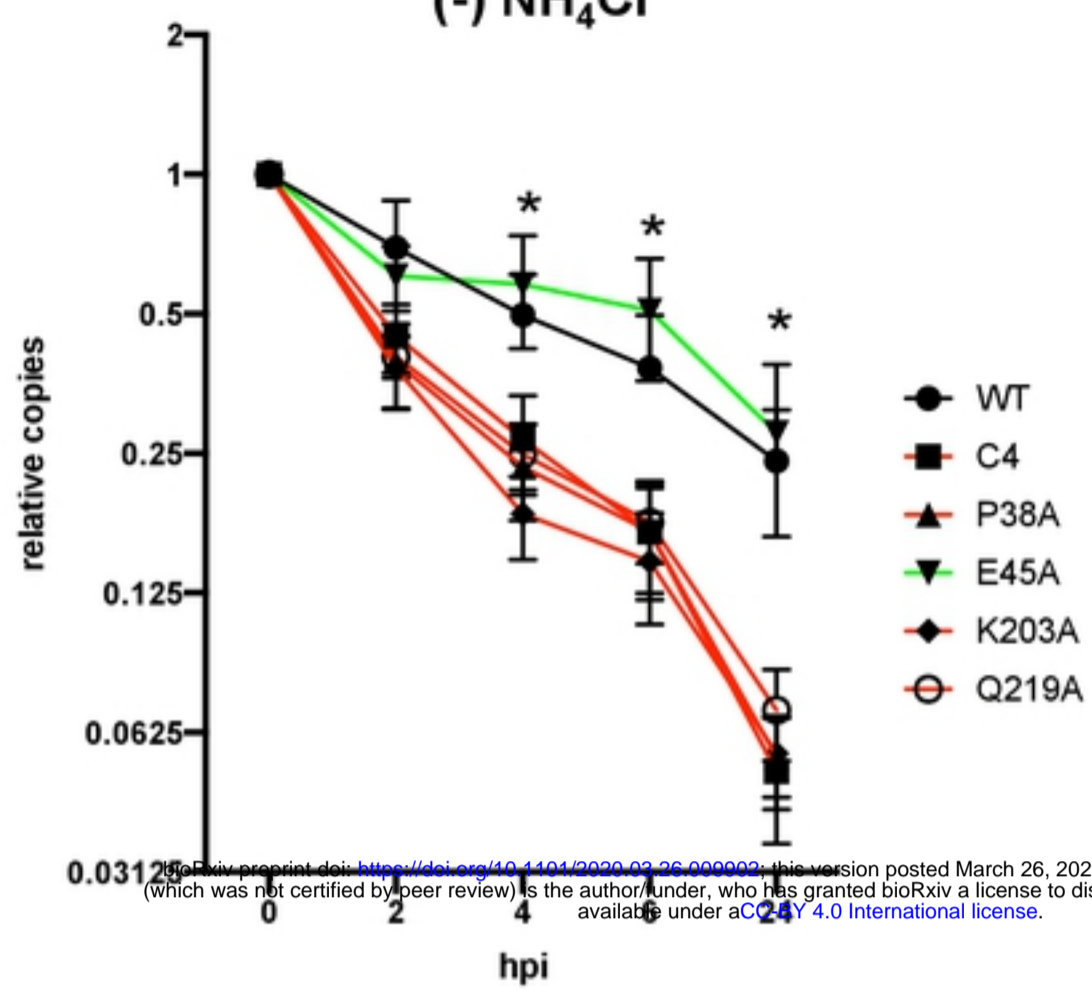

B

(+) NH<sub>4</sub>Cl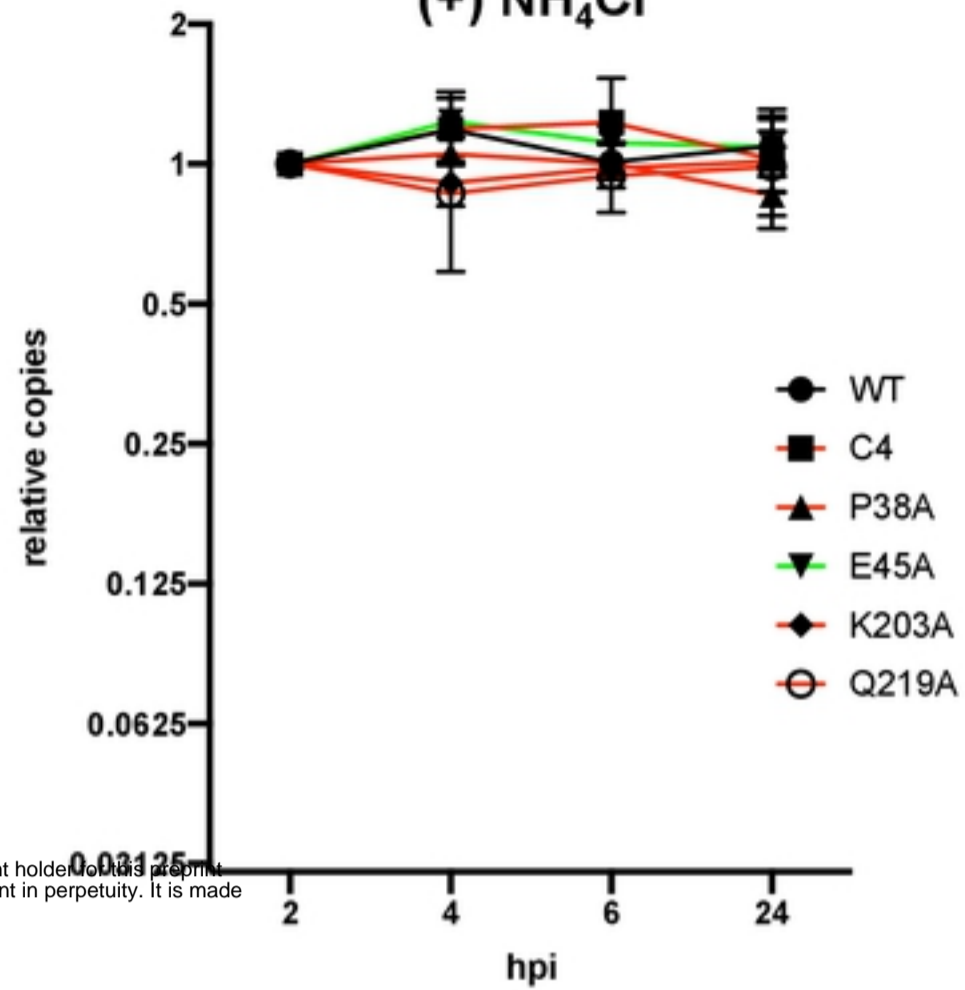

Figure 7

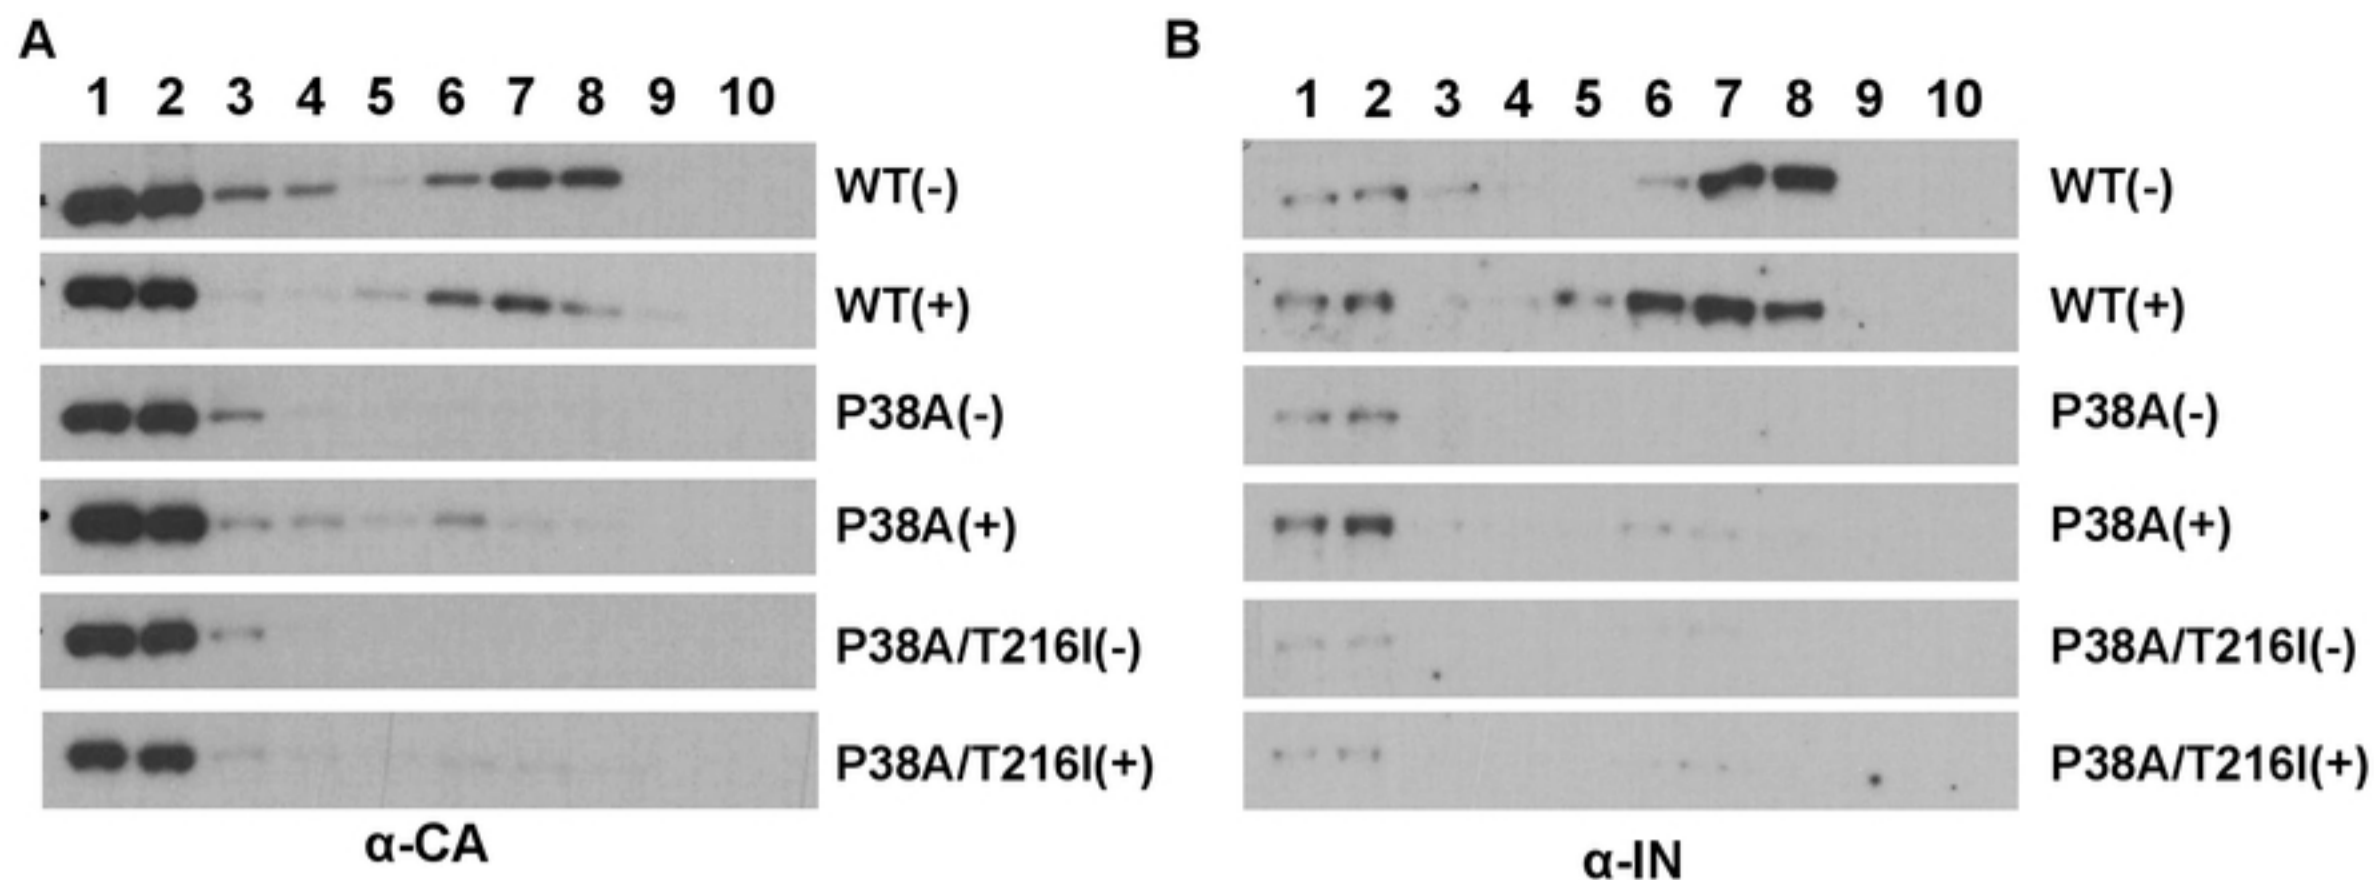

bioRxiv preprint doi: <https://doi.org/10.1101/2020.03.26.009902>; this version posted March 26, 2020. The copyright holder for this preprint (which was not certified by peer review) is the author/funder, who has granted bioRxiv a license to display the preprint in perpetuity. It is made available under aCC-BY 4.0 International license.

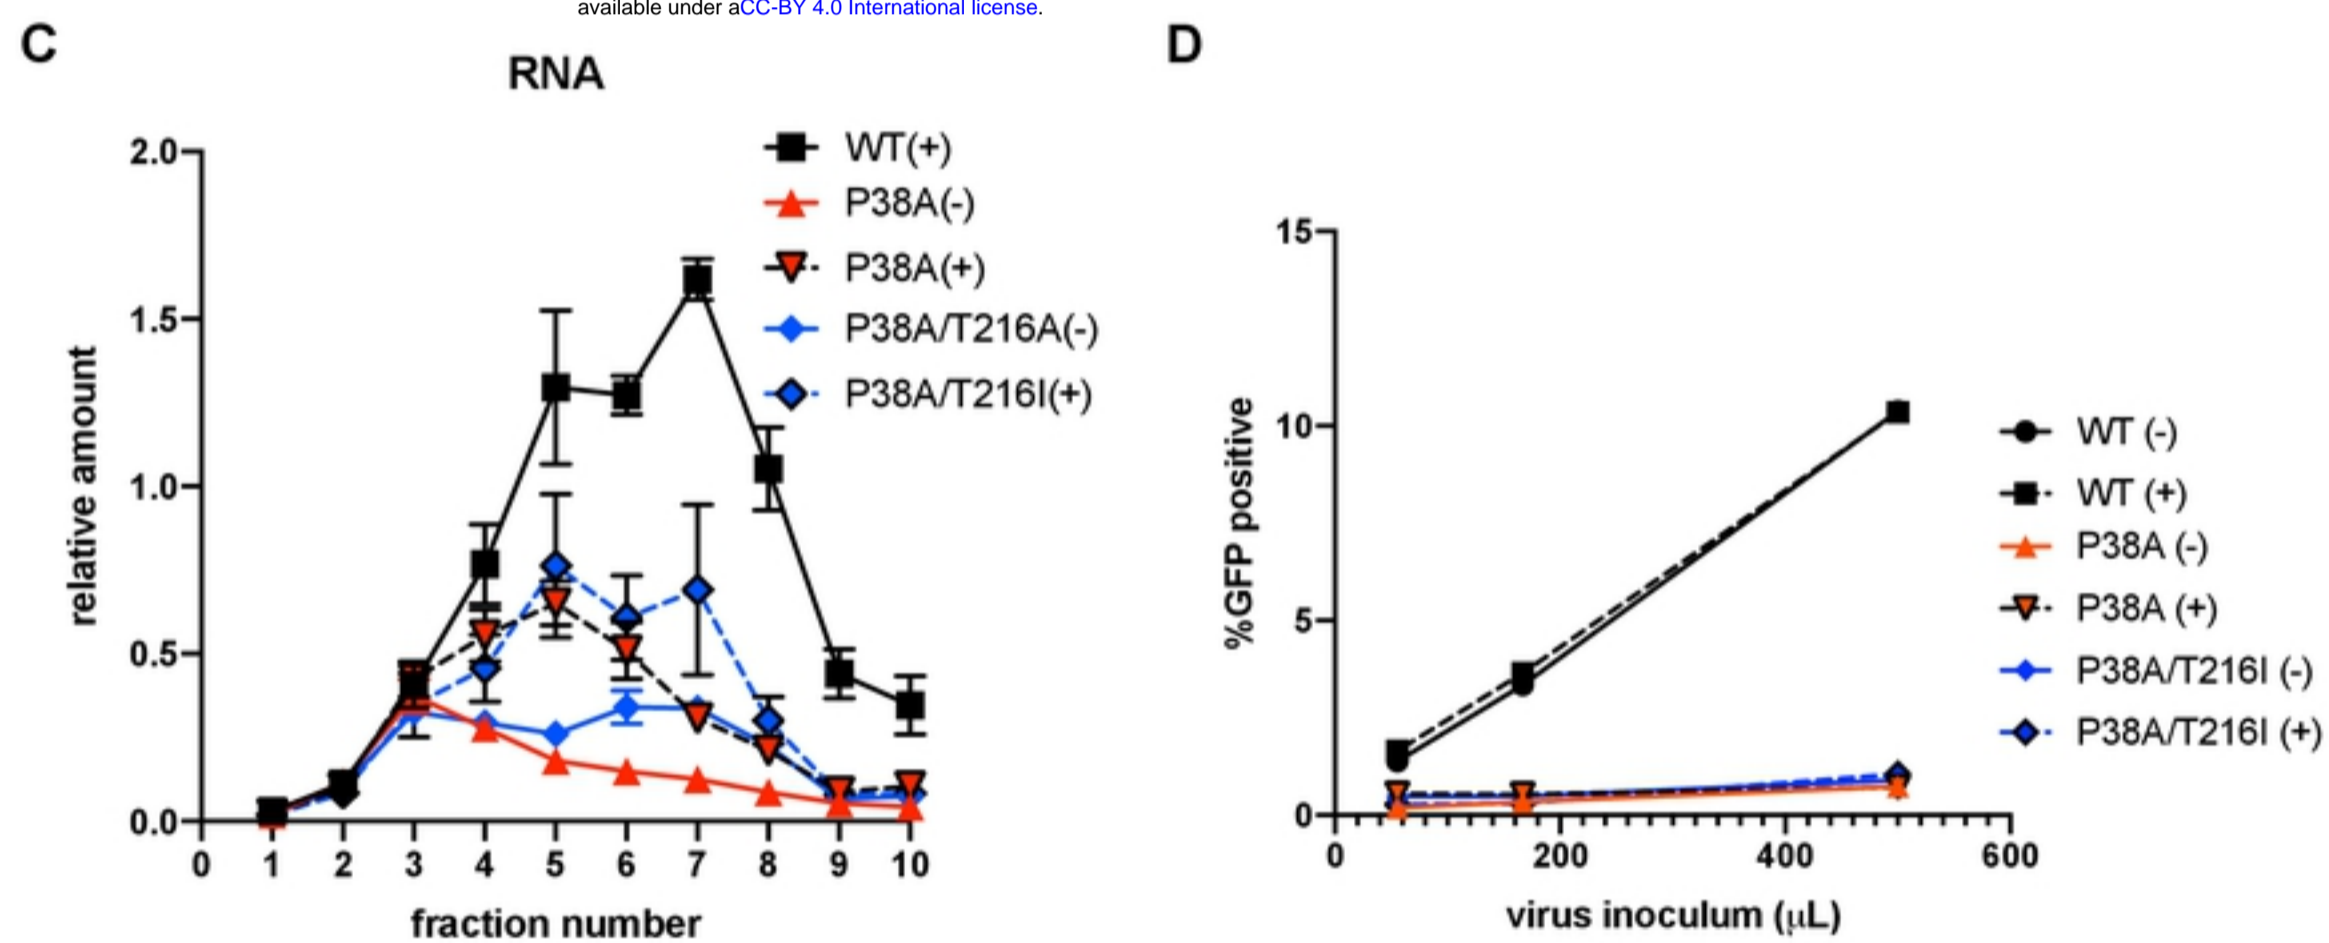

Figure 8

# WT HIV-1

# HIV-1 with unstable core

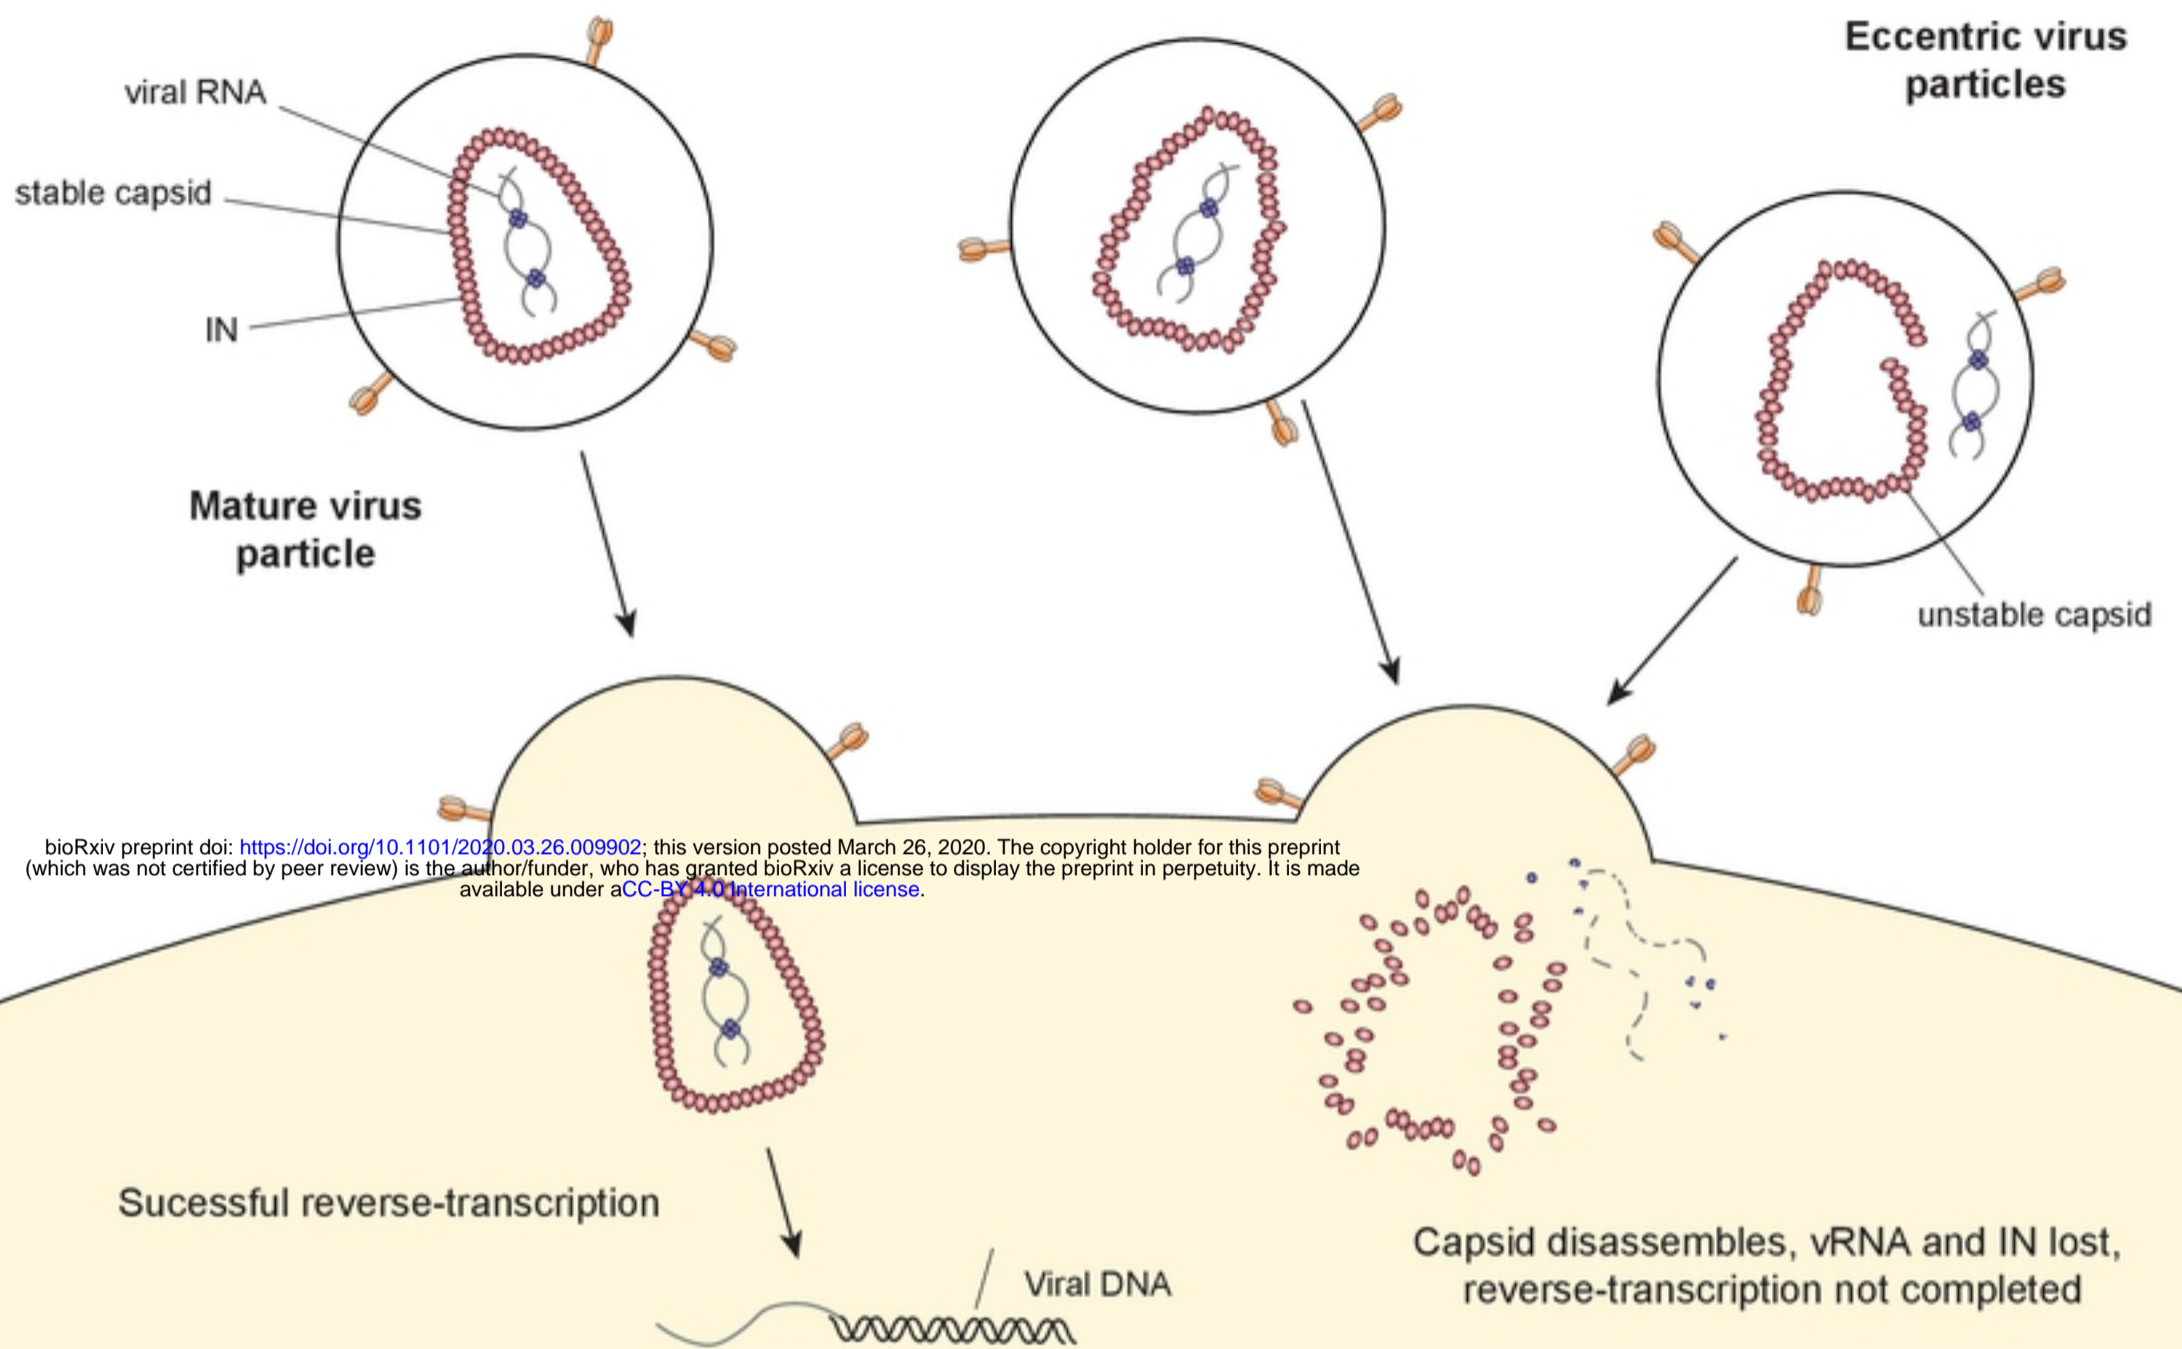

**Figure 9**

**A**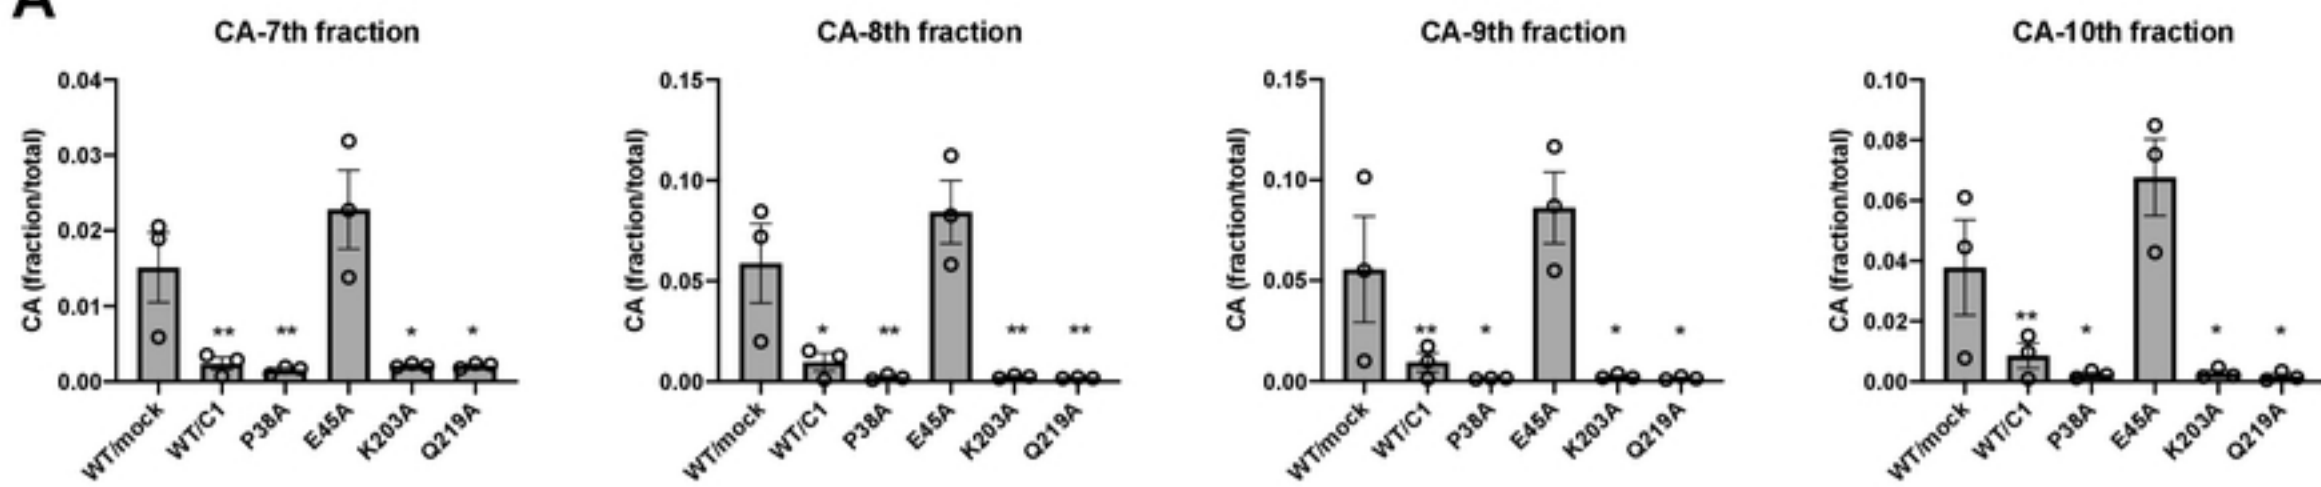**B**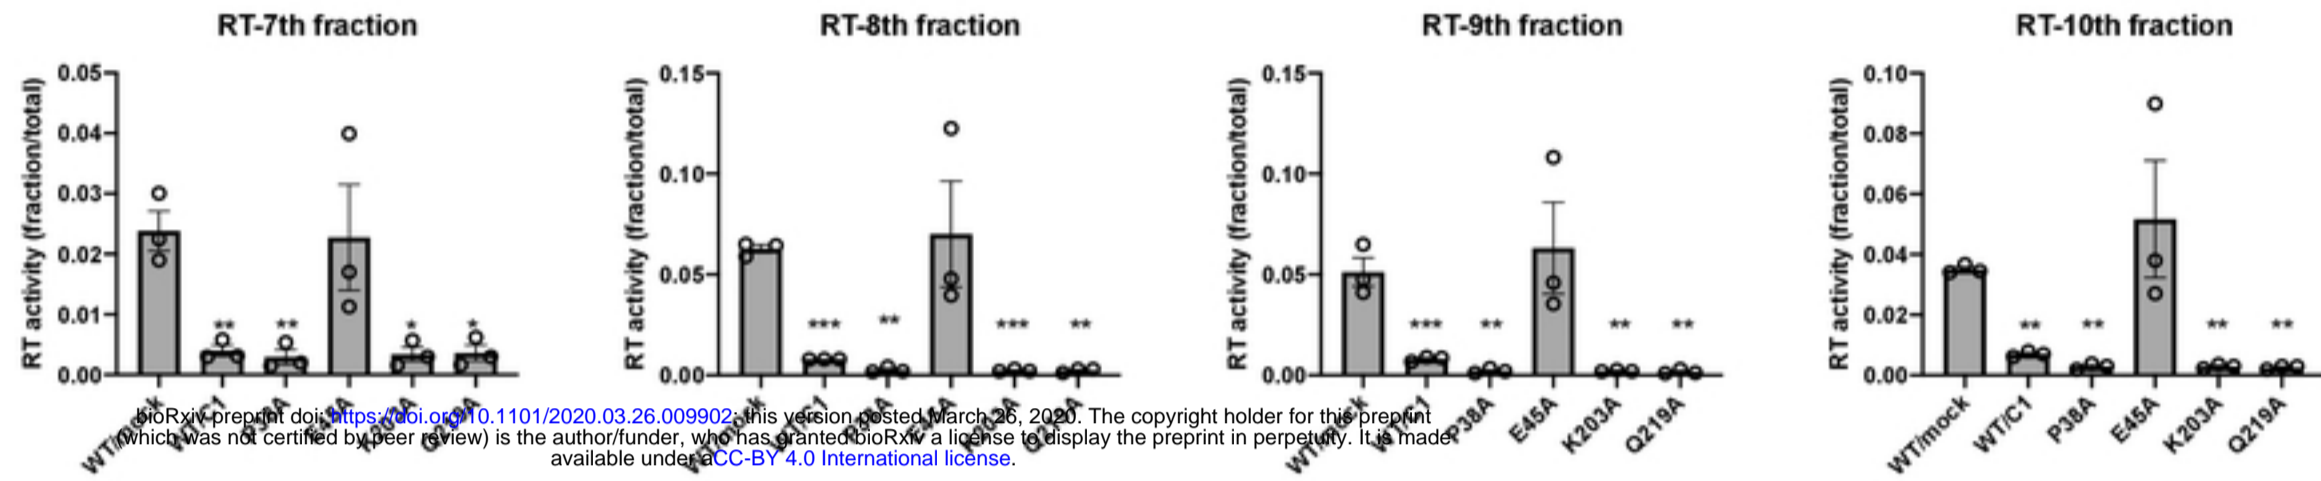

bioRxiv preprint doi: <https://doi.org/10.1101/2020.03.26.009902>; this version posted March 26, 2020. The copyright holder for this preprint (which was not certified by peer review) is the author/funder, who has granted bioRxiv a license to display the preprint in perpetuity. It is made available under aCC-BY 4.0 International license.

**Figure S1-Supplementary to Figure 4**

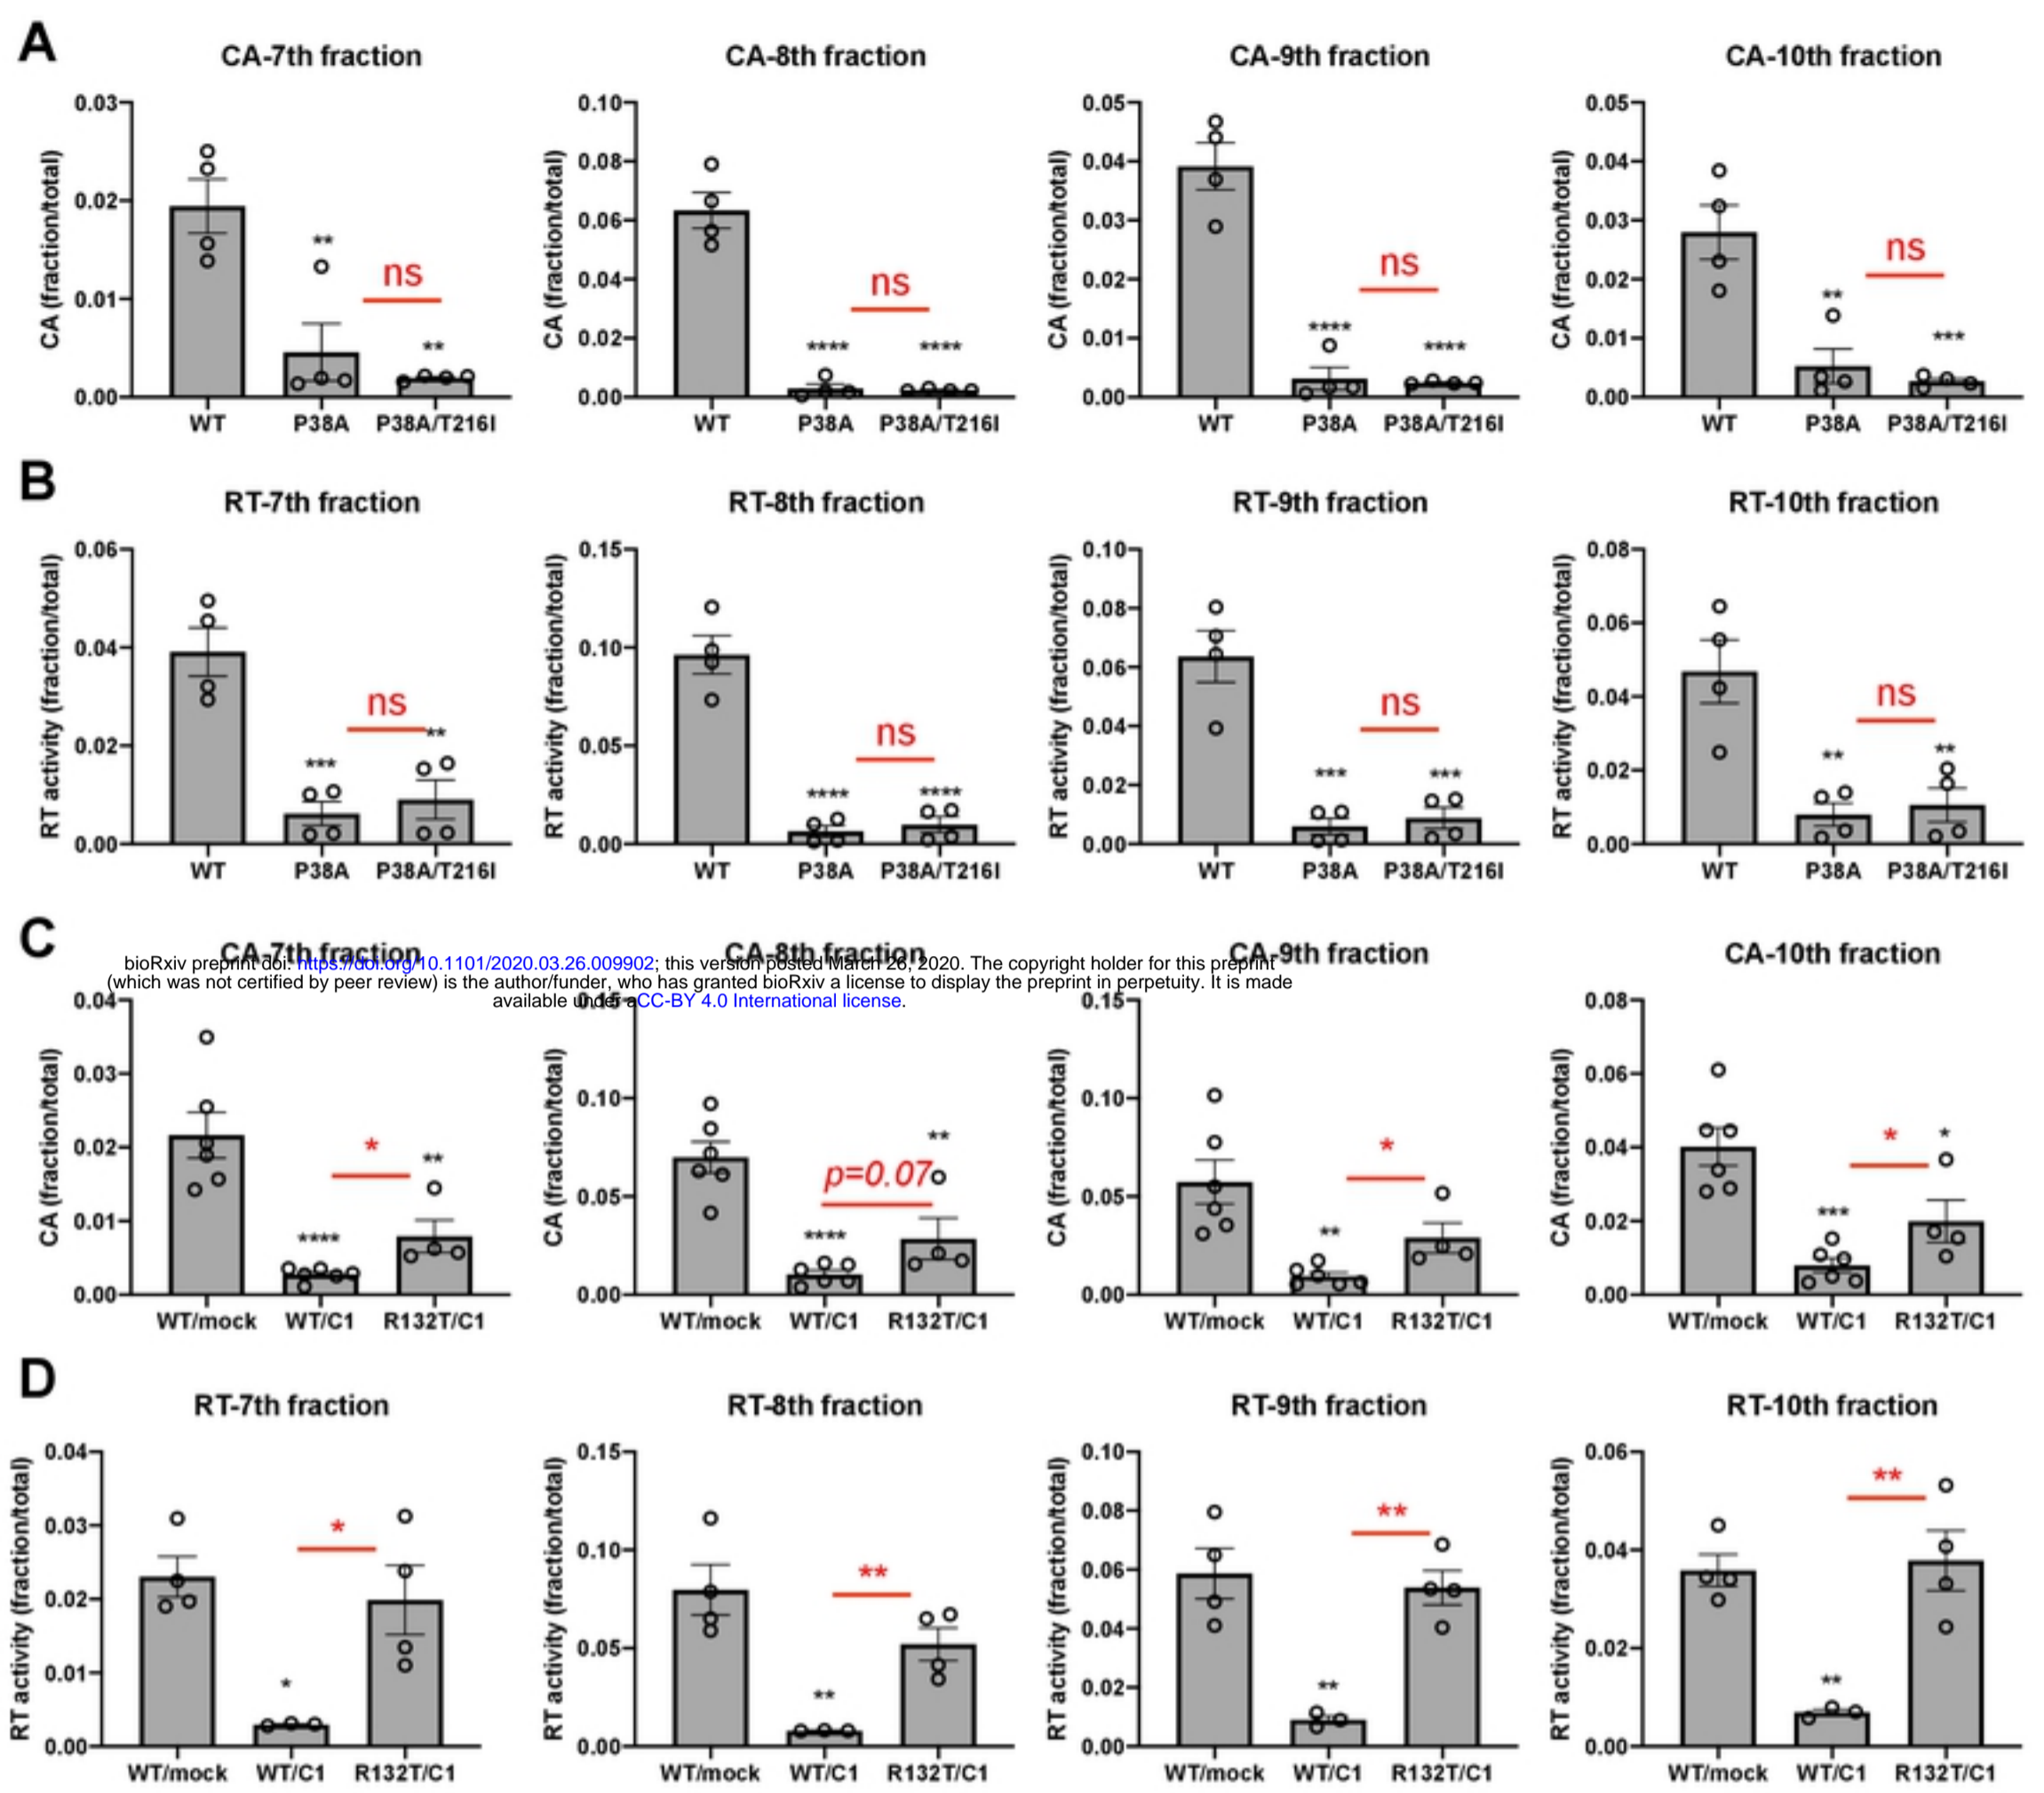

**Figure S2-Supplementary to Figure 5**

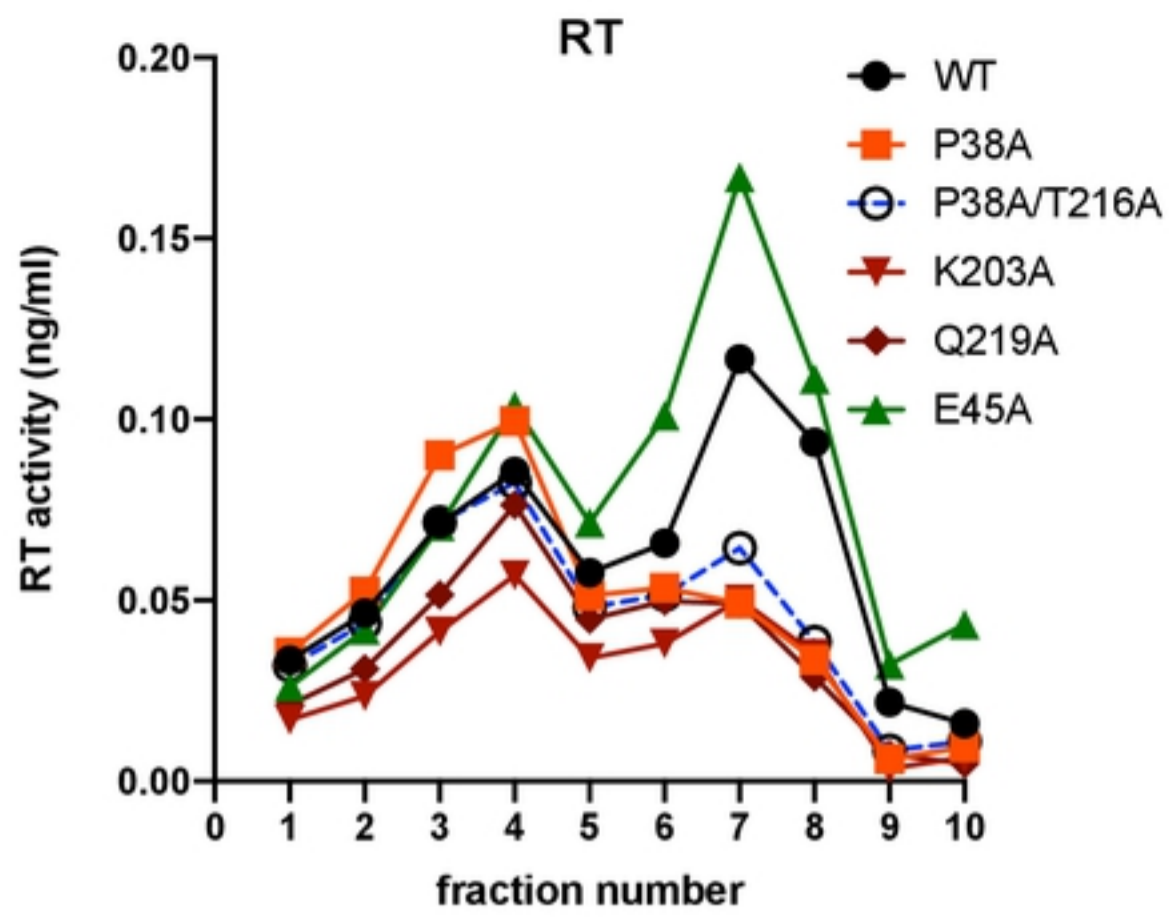

bioRxiv preprint doi: <https://doi.org/10.1101/2020.03.26.009902>; this version posted March 26, 2020. The copyright holder for this preprint (which was not certified by peer review) is the author/funder, who has granted bioRxiv a license to display the preprint in perpetuity. It is made available under aCC-BY 4.0 International license.

**Figure S3-Supplementary to Figure 6**



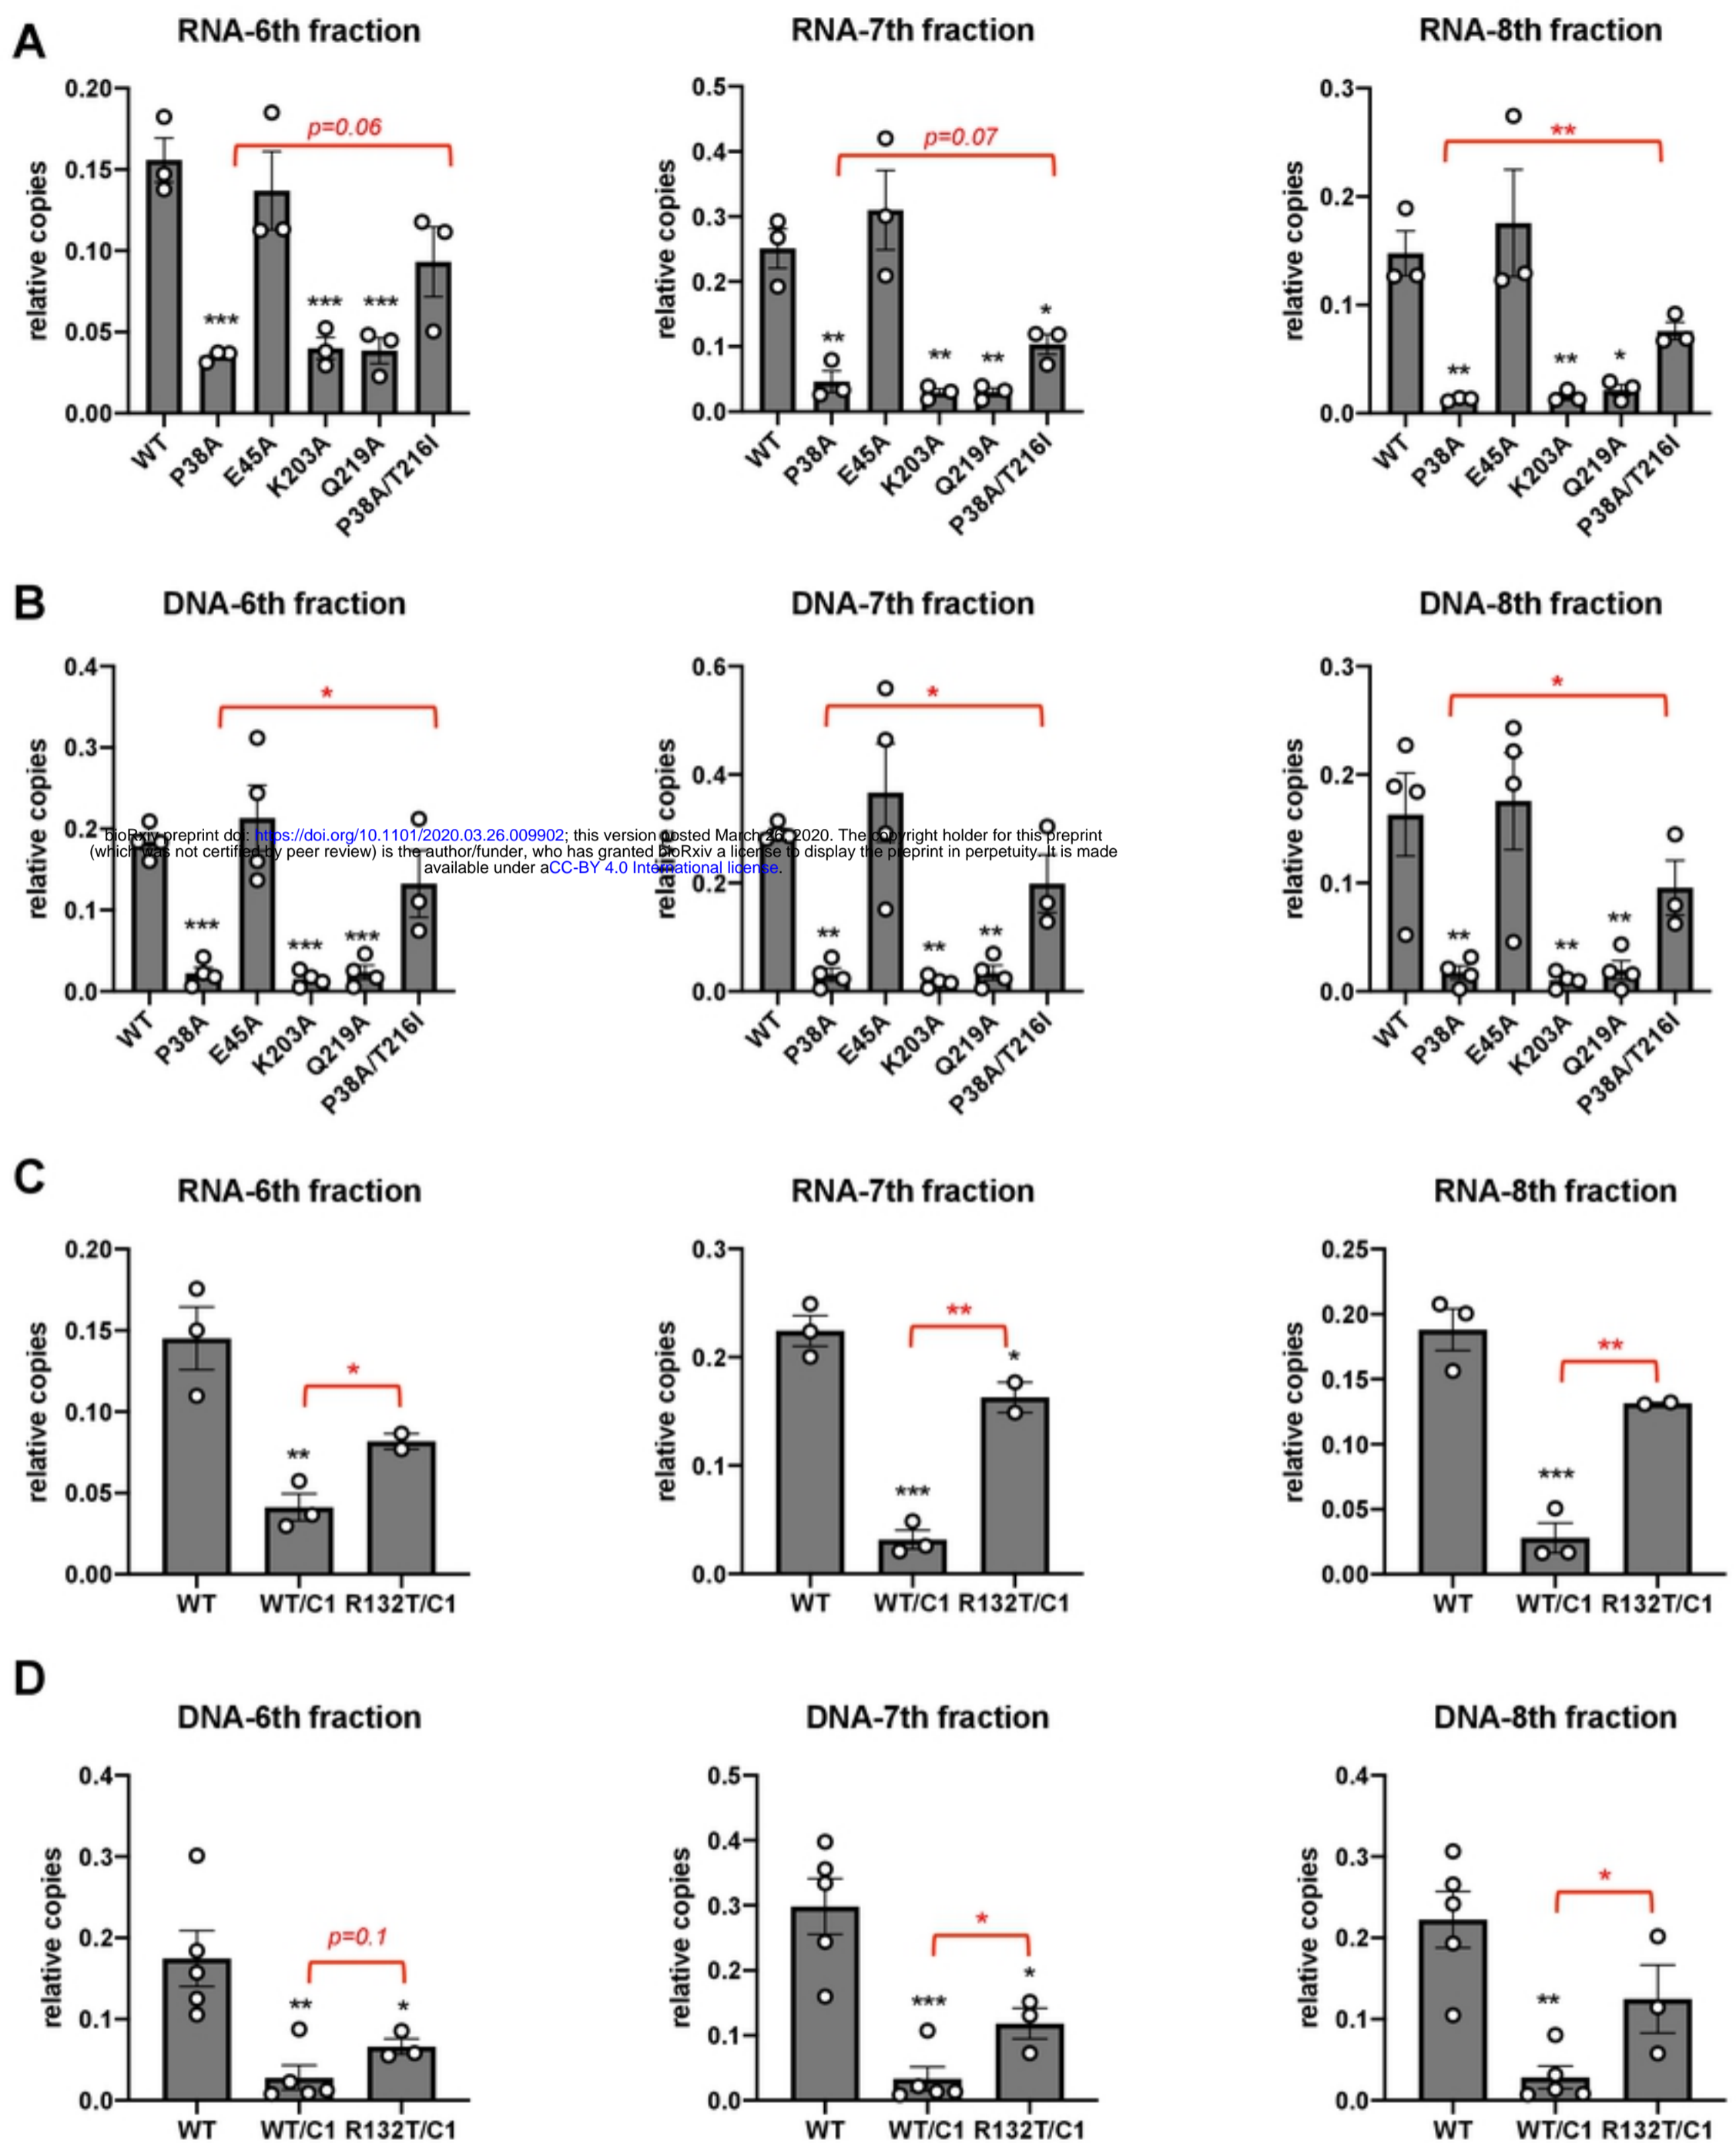

**Figure S4-Supplementary to Figure 6**

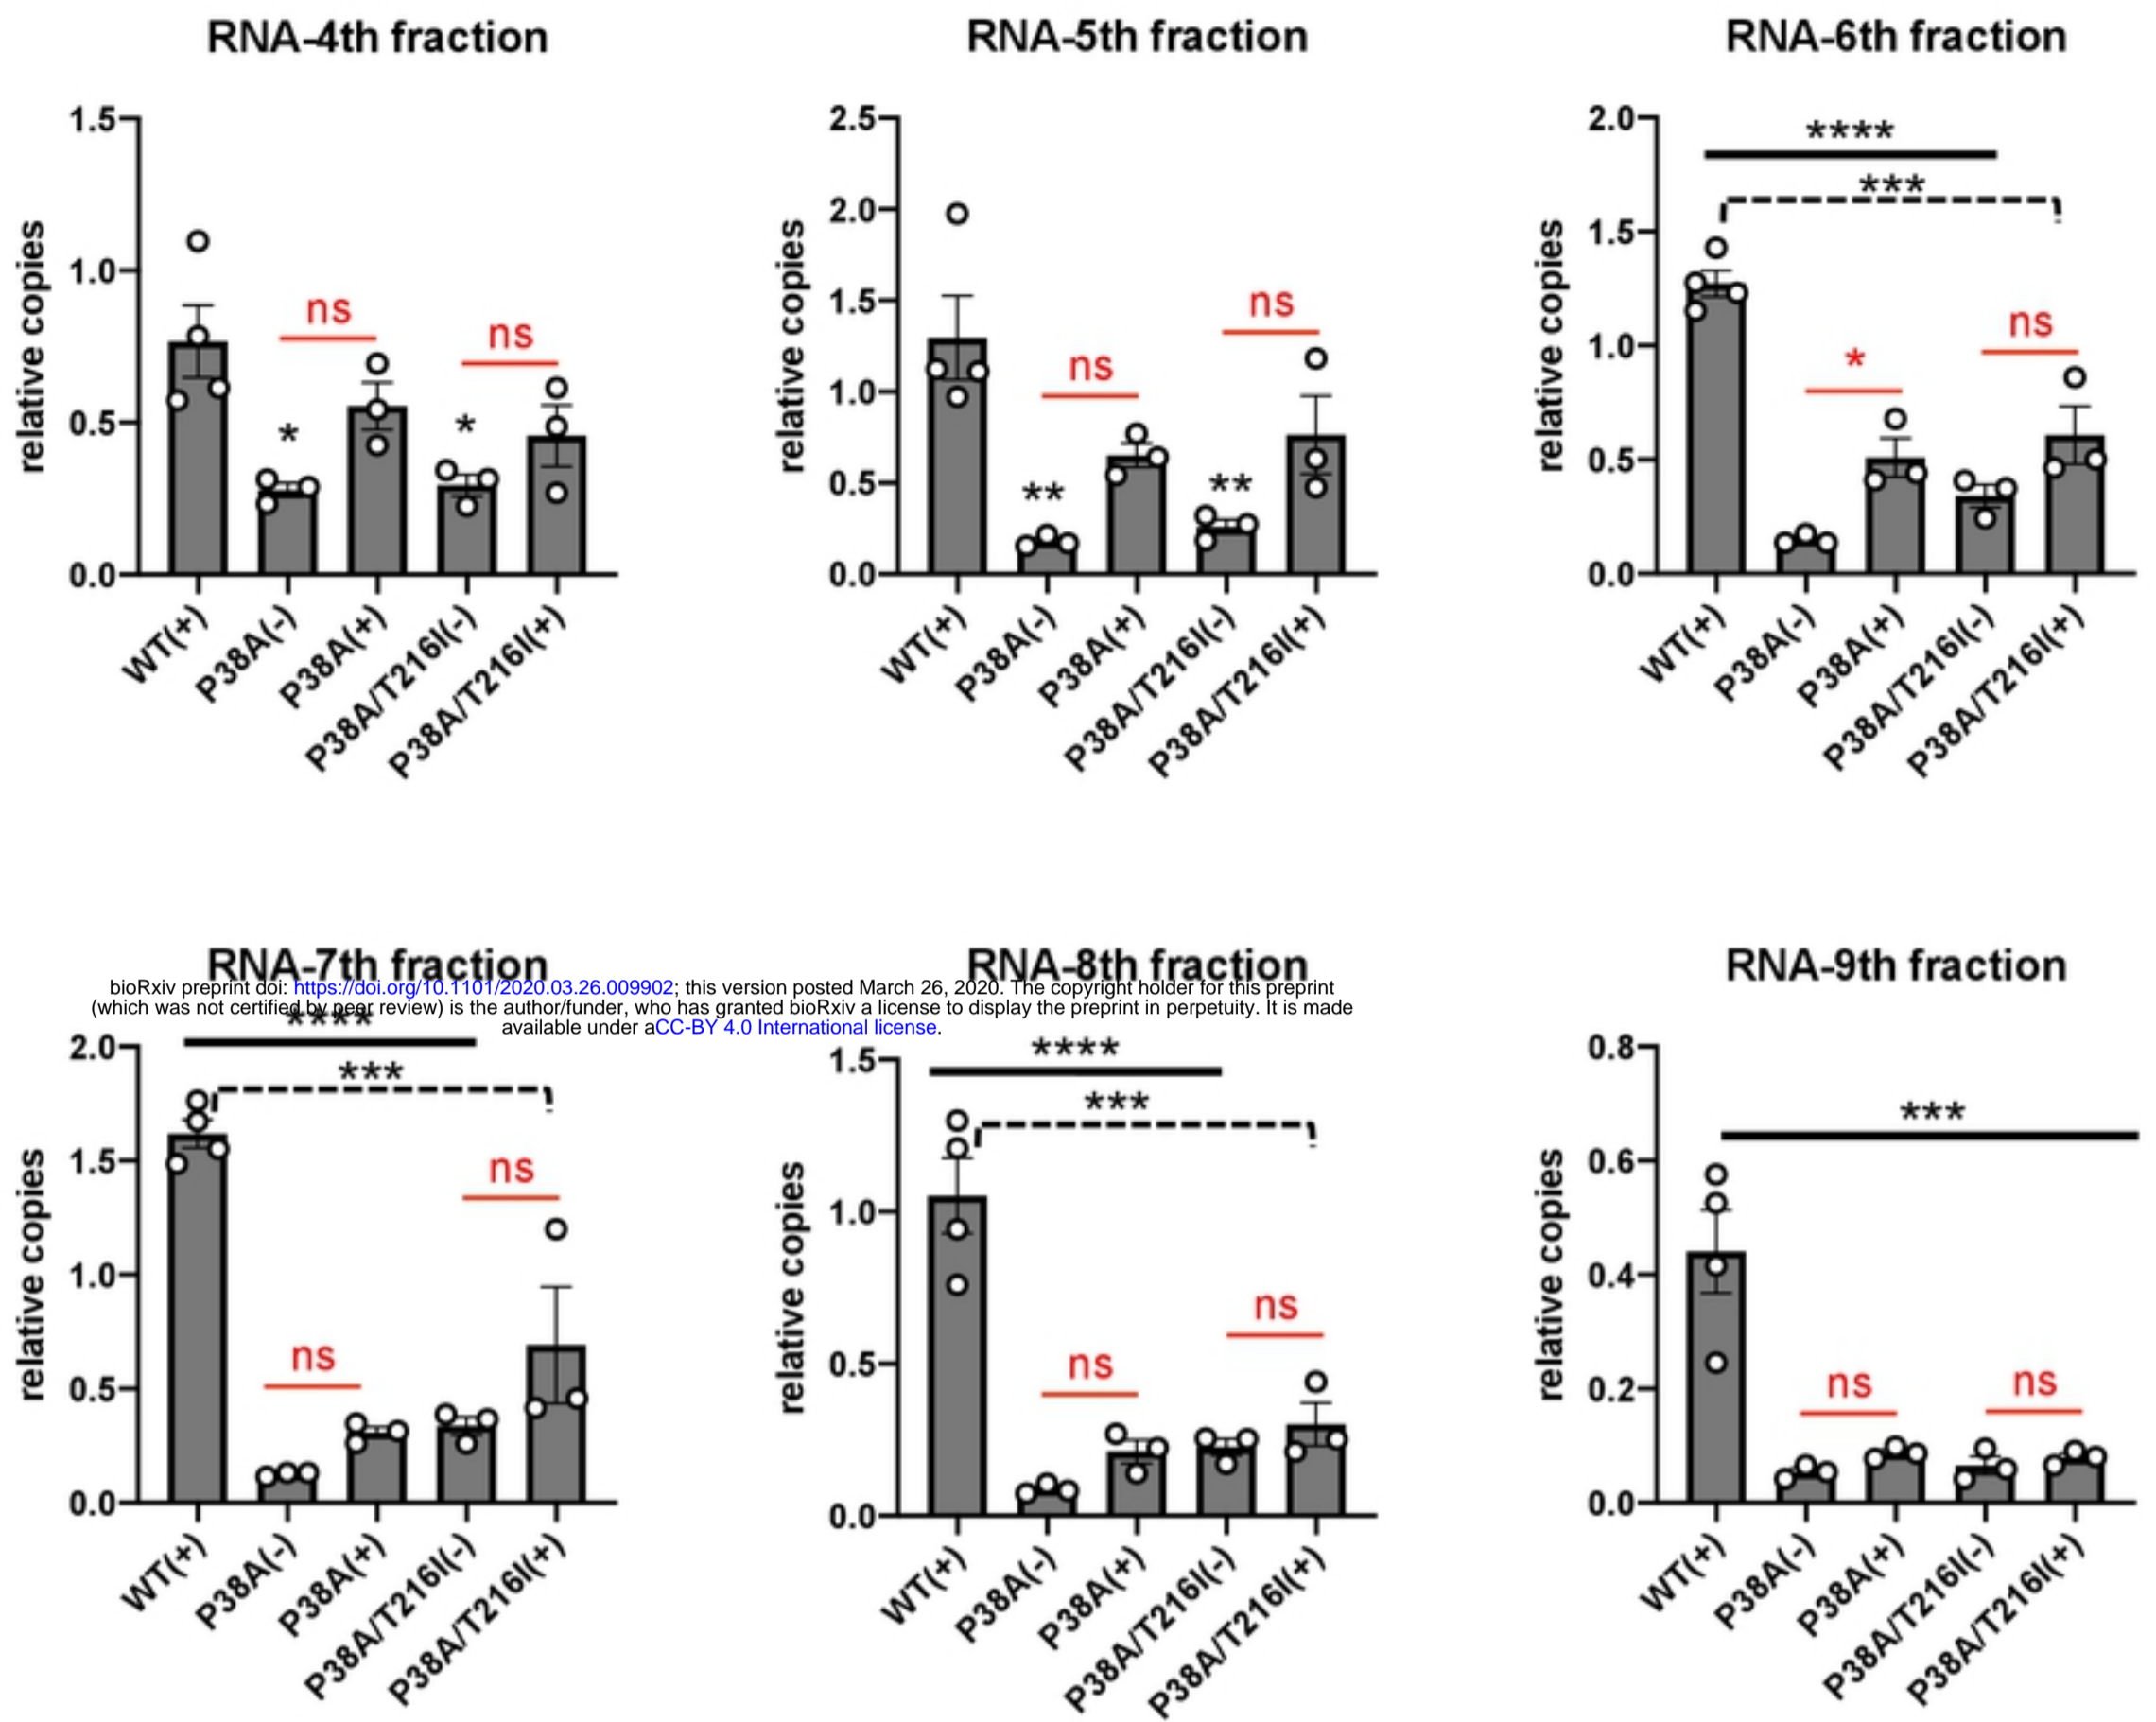

Figure S5-Supplementary to Figure 8

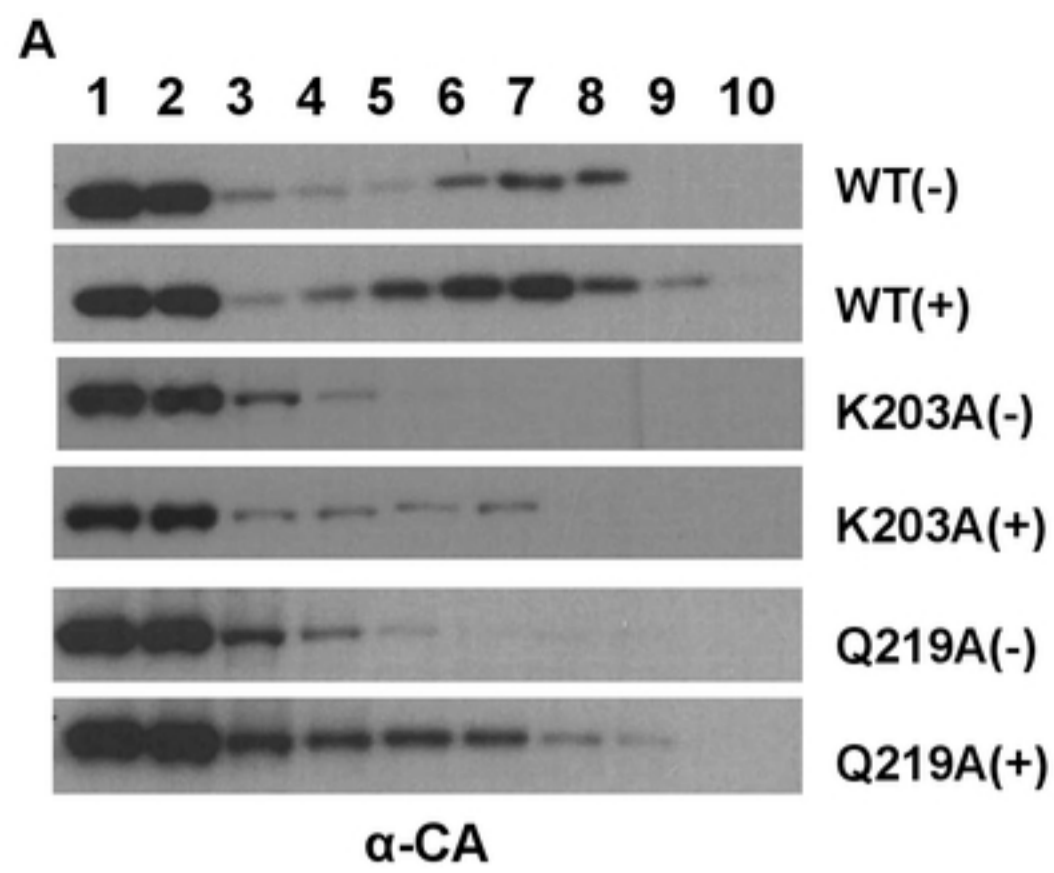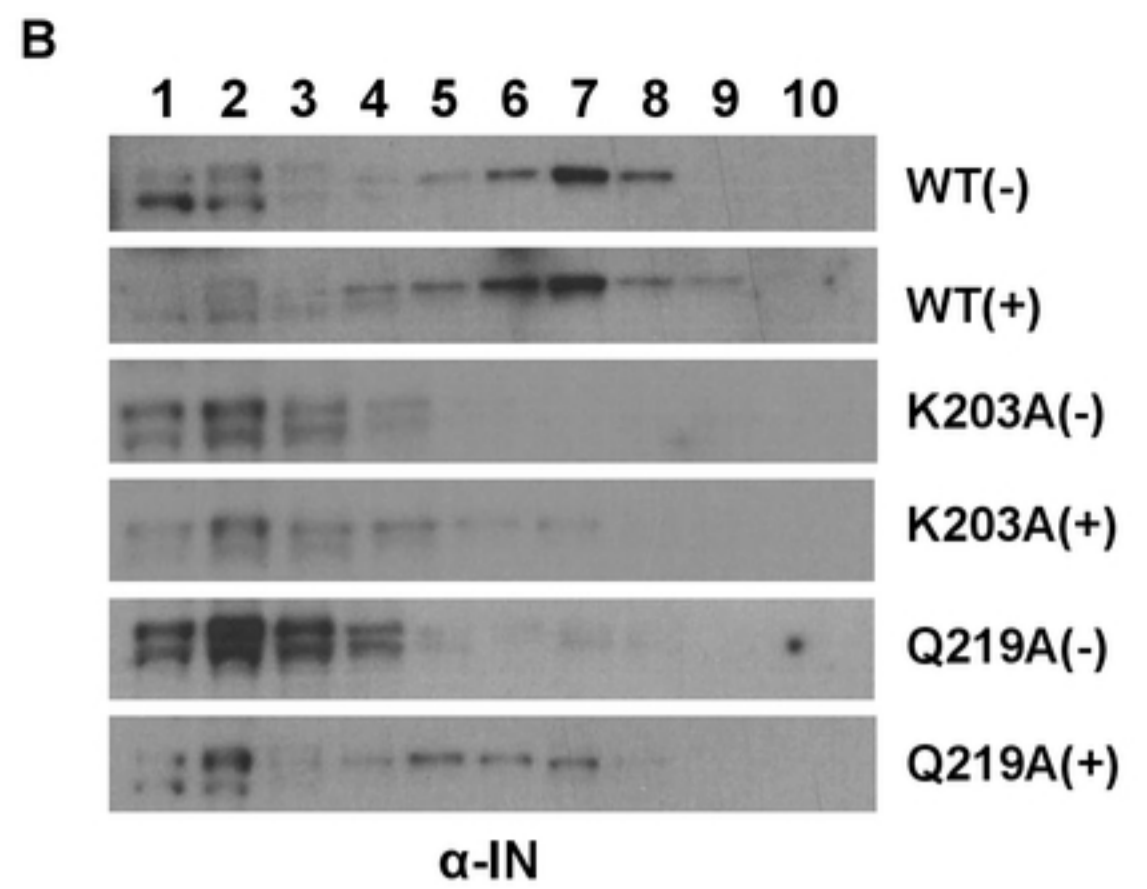

bioRxiv preprint doi: <https://doi.org/10.1101/2020.03.26.009902>; this version posted March 26, 2020. The copyright holder for this preprint (which was not certified by peer review) is the author/funder, who has granted bioRxiv a license to display the preprint in perpetuity. It is made available under aCC-BY 4.0 International license.

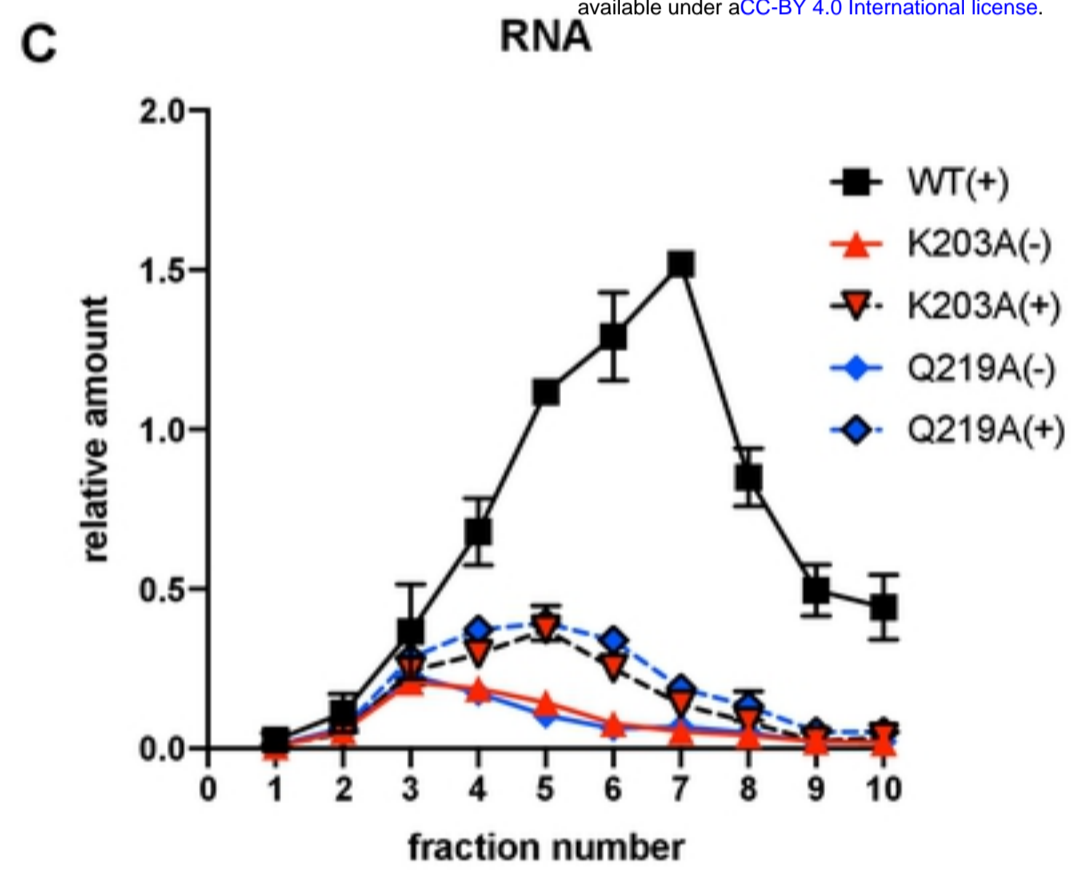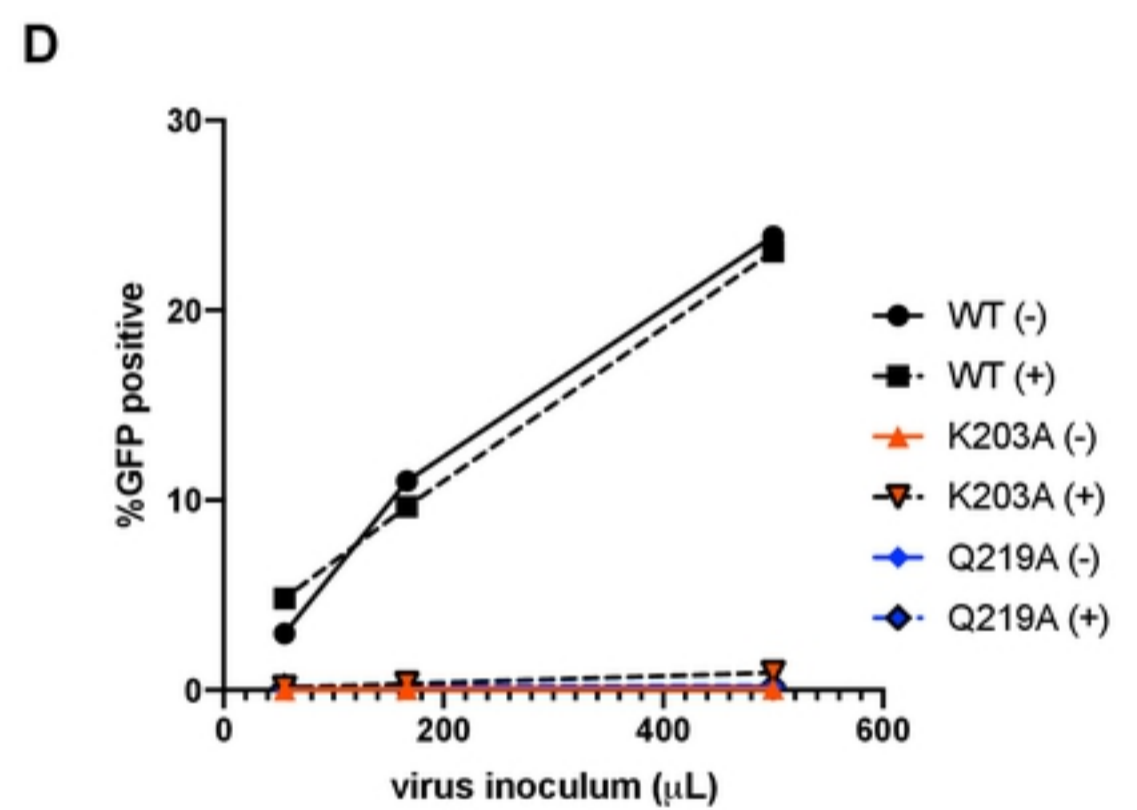

Figure S6-Supplementary to Figure 8

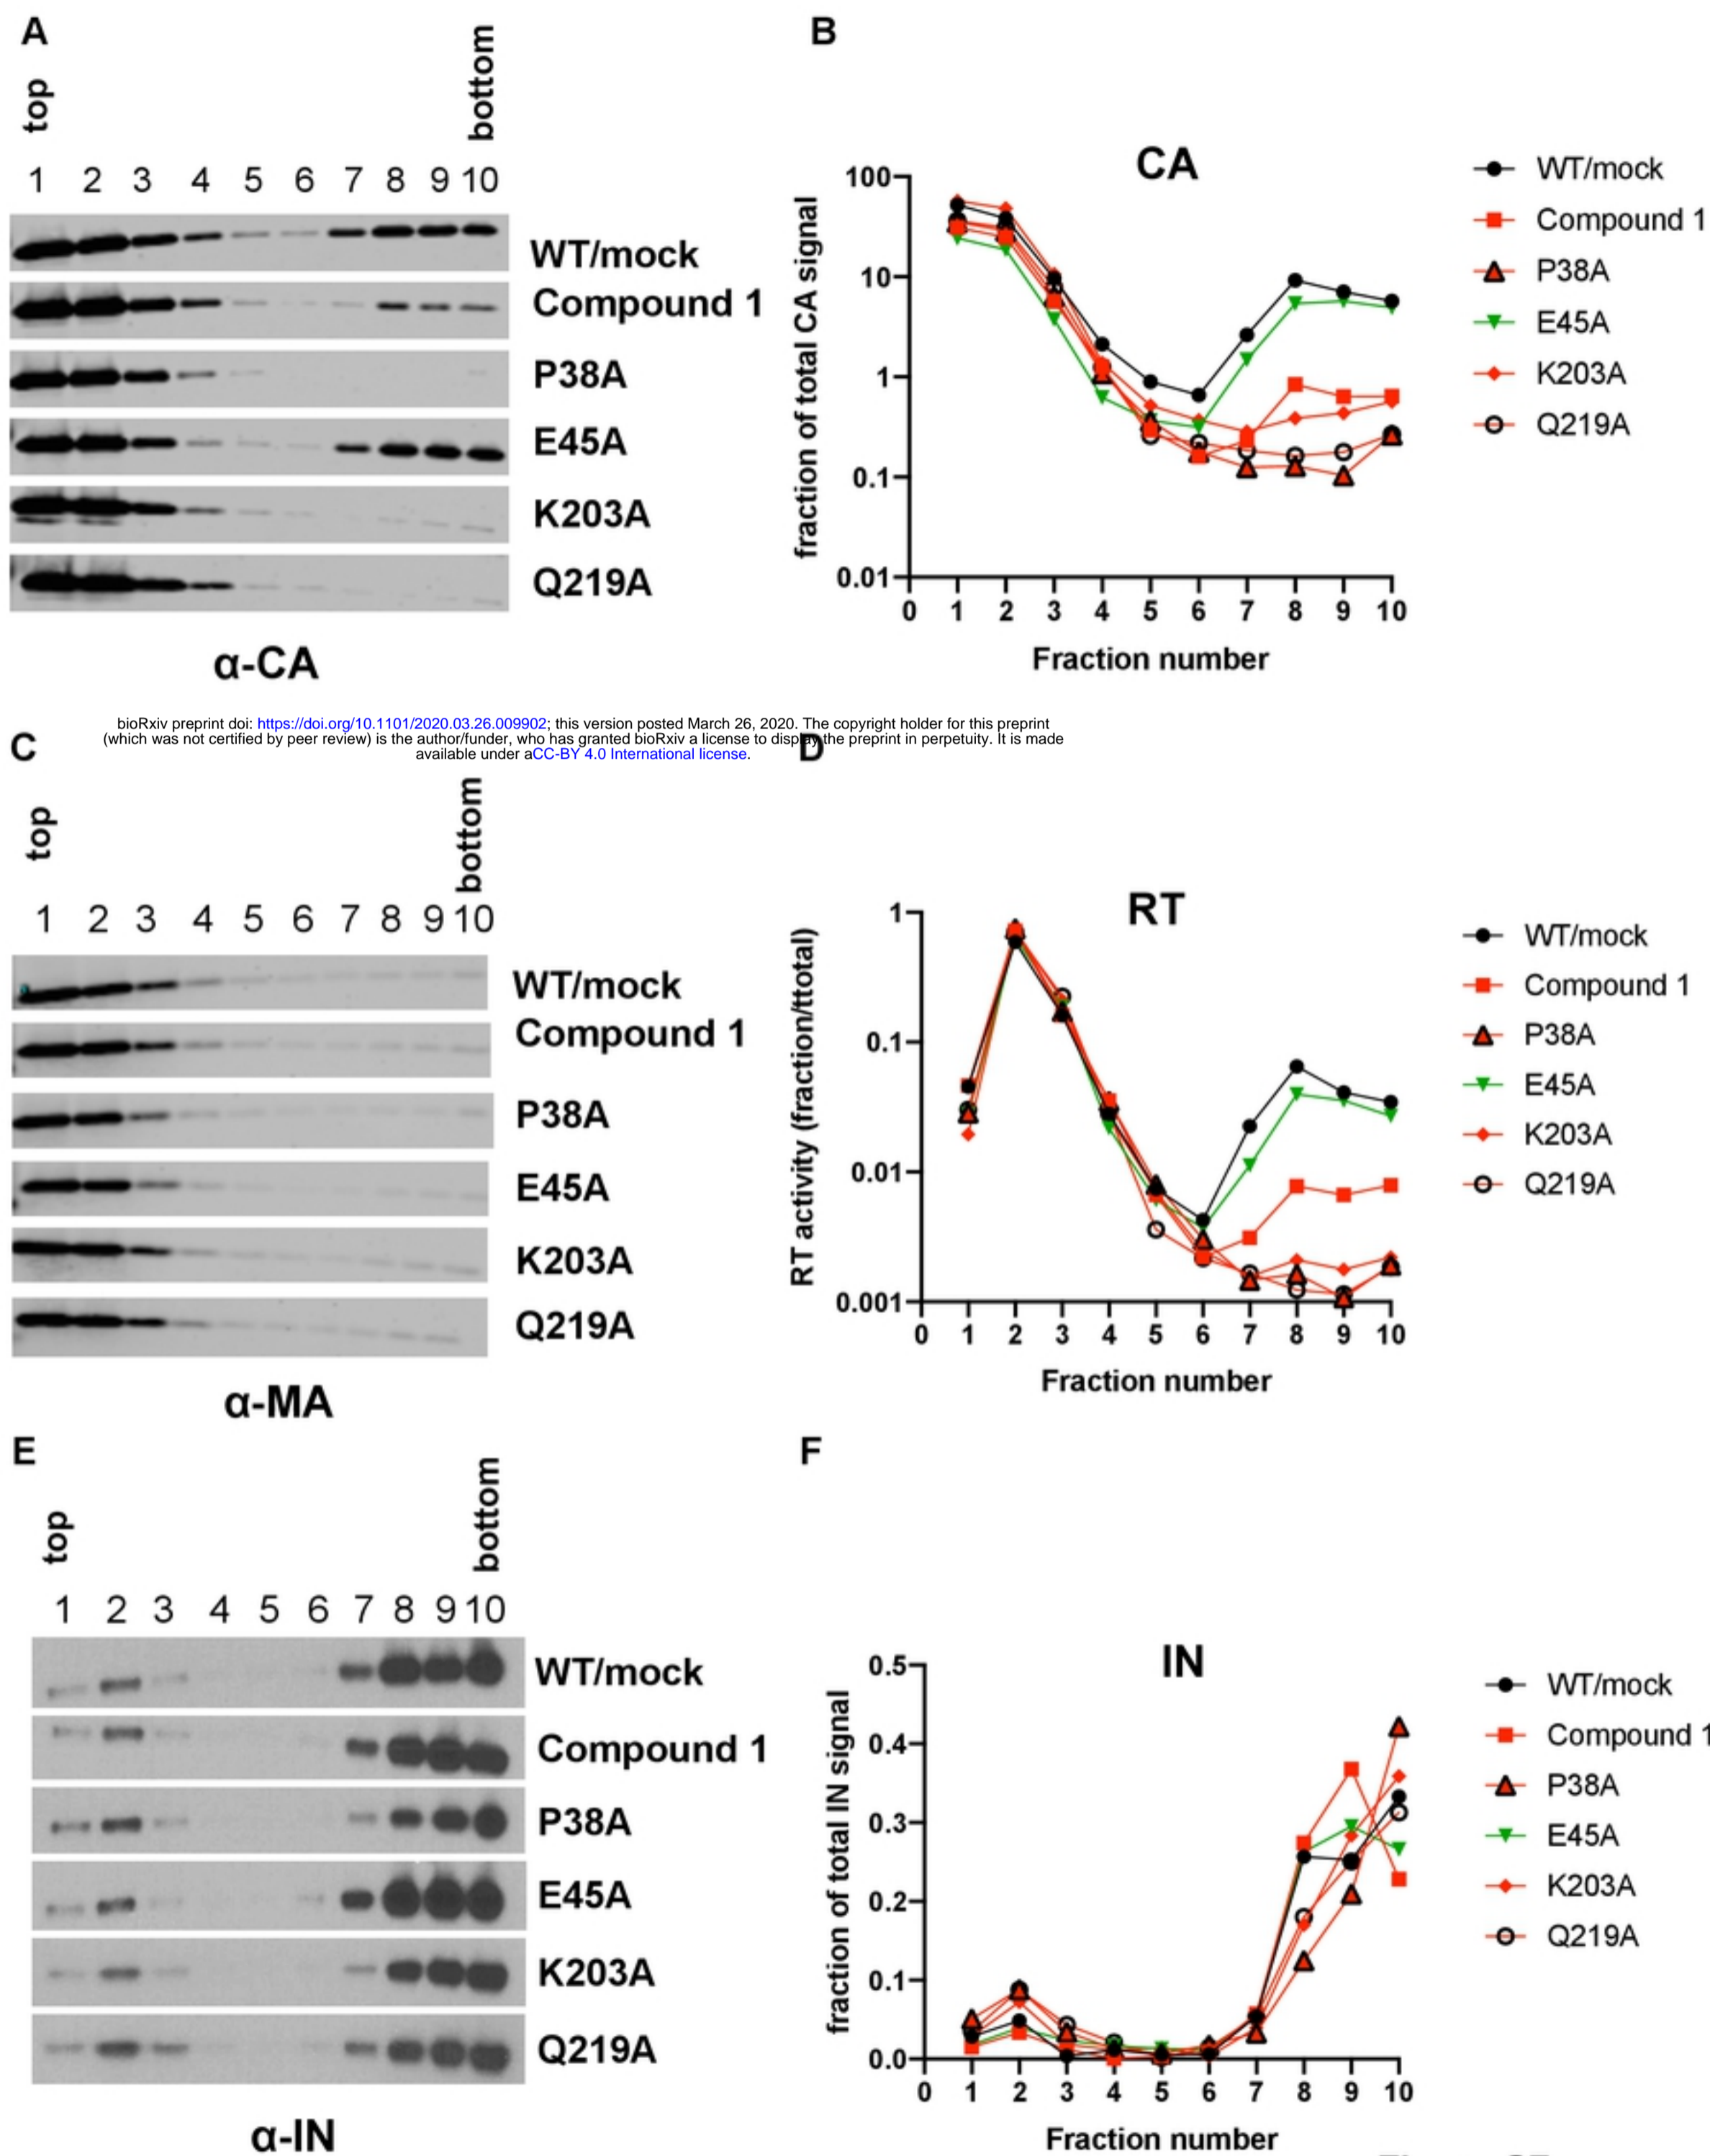

Figure S7
